# Supplementary material for: Proteomics analysis reveals elevated RAB21 in serum-derived extracellular vesicles from patients with follicular thyroid carcinoma
Source: Oncol Lett. 2025 Jul 16;30(3):444. doi: 10.3892/ol.2025.15190 (PMC12308455; doi:10.3892/ol.2025.15190)
Supplement: Supporting Data [file Supplementary_Data2.xlsx]

## Sheet: Table SI
Table SI. Patient characteristics.
No.	Sex	Age, years	Stage	Groupa	Pathologyb	Tgc	TgAbc	EV validationd	Proteomicsf	RAB21 WBg
1	F	60	-	FTA		-	-	○e
2	F	64	-	FTA		-	-	○
3	F	65	-	FTA		-	-	○
4	F	29	-	FTA		12.71	<15			○
5	F	45	-	FTA		61.71	<15		○	○
6	F	33	-	FTA		910.8	<15		○
7	F	56	-	FTA		5.14	50.3		○
8	F	31	-	FTA		181.3	15.7			○
9	F	41	-	FTA		292.3	<15			○
10	M	62	-	FTA		367.2	<15			○
11	M	42	-	FTA		654.7	<15		○
12	F	45	-	FTA		263.3	<15			○
13	F	43	-	FTA		-	20.3			○
14	F	65	-	FTA		54.84	16.3		○	○
15	F	53	pT3Ex0NX	FT-UMP	uncertain malignant potential	4.66	<15	○		○
16	F	45	pT1bEx0(m)NX	FTC	widely invasive, oxyphilic cell variant	<0.04	<15			○
17	F	67	pT2Ex0NX	FTC	minimally invasive	10.68	16.2	○		○
18	F	41	pT3Ex0NX	FTC	minimally invasive, oxyphilic cell variant	<0.04	<15		○
19	M	37	pT2Ex0NX	FTC	encapsulated angioinvasive	44.69	15			○
20	F	51	pT2Ex0NX	FTC	widely invasive	0.57	<15			○
21	M	54	pT3Ex0NX	FTC	encapsulated angioinvasive	5.67	<15		○
22	F	43	pT2Ex0(m)NX	FTC	widely invasive	0.97	<15	○	○
23	F	21	pT3Ex0NX	FTC	encapsulated angioinvasive	22.7	17.3		○
24	M	70	pT2Ex0NX	FTC	encapsulated angioinvasive	103.7	<15		○
25	M	73	pT2Ex0NX	FTC	widely invasive, oxyphilic cell variant	289.3	<15			○
aFTA: follicular thyroid adenoma, FT-UMP: follicular tumours of uncertain malignant potential, FTC: follicular thyroid carcinoma.
bThe pathological diagnosis is based on the WHO classification, 5th edition (1).
cTg: thyroglobulin, TgAb: thyroglobulin autoantibody.
dEV validation: These samples were used to confirm the EV particle size and EV markers shown in Fig. 1.
eCircles (○) indicate the samples used in each experiment.
fProteomics: These samples were used for the proteomic analysis shown in Fig. 2, Table I, and Table SIII.
gRAB21 WB: These samples were used to detect RAB21 protein within purified EVs shown in Fig. 3.
Reference
(1) WHO classification of tumours online, Endocrine and neuroendocrine Tumours (5th ed.). https://tumourclassification.iarc.who.int/chapters/53, 2024 (accessed 18 October 2024).

## Sheet: Table SII
Table SII. Sequences of small interfering RNAs.
Targets	Sequence
Human RAB21	5’- GGG UCA AAG AAU UAC GGA AAA UGT T -3' (sense)
	5’- AAC AUU UUC CGU AAU UCU UUG ACC CAG -3' (antisense)
Negative control DsiRNA	5’- CGU UAA UCG CGU AUA AUA CGC GUA T -3’ (sense)
	5'- AUA CGC GUA UUA UAC GCG AUU AAC GAC -3' (antisense)

## Sheet: Table SIII
Table SIII. Results of proteomic analysis.
This table combines protein identification data from Proteome Discoverer with its quantitative values normalized by NormalyzerDE median-based standardization, which also provided statistical parameters (P-values and log2 fold changes).
Description	Gene symbol	Accession	Sum PEP score	Coverage [%]	# Peptides	# Isoforms	# PSMs	# Unique Peptides	# AAs	MW [kDa]	calc. pI	PValue	log2_FoldChange	FTA_1	FTA_2	FTA_3	FTA_4	FTA_5	FTC_1	FTC_2	FTC_3	FTC_4	FTC_5
Complement C3 OS=Homo sapiens OX=9606 GN=C3 PE=1 SV=2	C3	P01024	1664.99	79	159	178	8790	159	1663	187	6.4	0.320995	0.523389	35.697	35.9533	36.1578	34.6883	35.5756	36.4575	35.3107	35.6904	38.3125	34.9178
Filamin-A OS=Homo sapiens OX=9606 GN=FLNA PE=1 SV=4	FLNA	P21333	1008.47	63	136	136	2825	136	2647	280.6	6.06	0.810923	0.123486	32.9709	31.791	30.0426	33.2597	33.5225	32.7227	32.888	31.888	32.1732	32.5321
Serum albumin OS=Homo sapiens OX=9606 GN=ALB PE=1 SV=2	ALB	P02768	910.215	90	87	95	3213	87	609	69.3	6.28	0.369102	0.657141	32.6942	34.1953	34.958	34.9601	32.8968	32.9424	34.5641	37.849	33.4593	34.1753
Talin-1 OS=Homo sapiens OX=9606 GN=TLN1 PE=1 SV=3	TLN1	Q9Y490	813.825	52	107	108	2084	107	2541	269.6	6.07	0.401829	-0.27694	32.8956	32.3215	31.6335	32.9421	32.8572	32.4664	32.5259	31.7385	31.9575	32.5768
Complement C4-B OS=Homo sapiens OX=9606 GN=C4B PE=1 SV=2	C4B; C4B_2	P0C0L5	688.072	51	79	82	1742	2	1744	192.6	7.27	0.279452	0.698665	31.8927	32.6312	31.7375	30.7396	32.2217	33.6197	32.4225	32.1548	33.9823	30.5367
Complement C4-A OS=Homo sapiens OX=9606 GN=C4A PE=1 SV=2	C4A	P0C0L4	675.75	51	78	81	1730	1	1744	192.7	7.08	0.254184	1.07976	22.9688	23.063		20.9004	23.3098	24.3067			25.216	21.3981
Apolipoprotein B-100 OS=Homo sapiens OX=9606 GN=APOB PE=1 SV=2	APOB	P04114	508.818	25	92	92	1174	92	4563	515.3	7.05	0.885775	0.0583051	30.5357	30.3981	31.5006	30.283	30.856	30.7998	30.9694	30.2163	31.0308	30.8484
Serotransferrin OS=Homo sapiens OX=9606 GN=TF PE=1 SV=3	TF	P02787	375.627	74	53	53	819	53	698	77	7.12	0.464308	0.544219	28.661	30.6994	31.2352	30.1867	28.2752	28.0273	30.208	33.2863	30.31	29.9471
Integrin alpha-IIb OS=Homo sapiens OX=9606 GN=ITGA2B PE=1 SV=3	ITGA2B	P08514	321.139	45	40	41	1511	40	1039	113.3	5.38	0.816611	0.0942488	33.3694	32.3848	30.9706	33.0972	33.2011	33.2488	32.907	32.21	32.4379	32.6907
Complement factor B OS=Homo sapiens OX=9606 GN=CFB PE=1 SV=2	CFB	P00751	316.021	43	44	44	1158	44	764	85.5	7.06	0.494951	0.279459	31.9323	32.149	32.5625	30.9781	31.3893	31.7536	31.402	31.7035	33.6979	31.8515
Integrin beta-3 OS=Homo sapiens OX=9606 GN=ITGB3 PE=1 SV=2	ITGB3	P05106	309.154	47	37	38	1139	37	788	87	5.24	0.945	0.023087	32.4424	31.392	30.8515	32.2712	32.4786	32.2957	31.9304	31.4527	31.6154	32.2569
Immunoglobulin heavy constant mu OS=Homo sapiens OX=9606 GN=IGHM PE=1 SV=4	IGHM	P01871	279.829	66	30	31	1732	30	453	49.4	6.77	0.908777	0.0846994	32.7188	34.8013	33.6238	30.5605	31.9835	33.9167	33.1179	32.6367	33.0557	31.3845
Alpha-actinin-1 OS=Homo sapiens OX=9606 GN=ACTN1 PE=1 SV=2	ACTN1	P12814	254.546	46	37	37	505	23	892	103	5.41	0.670278	0.255292	29.4649	28.6872	26.5425	30.1582	30.5439	29.6671	30.0407	28.4017	29.4104	29.1533
Isoform Alpha-6X1X2A of Integrin alpha-6 OS=Homo sapiens OX=9606 GN=ITGA6	ITGA6	P23229-6	224.486	38	35	35	657	35	1112	124	6.61	0.720879	0.156504	30.4695	29.1909	28.2041	30.4415	30.9038	30.6256	30.3609	29.4149	29.5538	30.0372
Actin, cytoplasmic 1 OS=Homo sapiens OX=9606 GN=ACTB PE=1 SV=1	ACTB	P60709	223.187	69	26	33	1204	9	375	41.7	5.48	0.821238	-0.103083	33.8958	32.9019	31.6047	34.1782	34.2609	33.5219	33.652	32.7806	32.8306	33.5409
Alpha-2-macroglobulin OS=Homo sapiens OX=9606 GN=A2M PE=1 SV=3	A2M	P01023	220.84	40	45	45	119	45	1474	163.2	6.46	0.285787	0.939019	25.3315	27.1674	27.5181	25.3878	25.2567	25.0595	26.4295	31.5291	26.2304	26.108
WD repeat-containing protein 1 OS=Homo sapiens OX=9606 GN=WDR1 PE=1 SV=4	WDR1	O75083	210.687	68	30	30	456	30	606	66.2	6.65	0.874285	-0.0843493	29.9942	28.7237	26.8581	30.1037	30.1201	29.2648	29.6163	28.4271	28.6394	29.4305
Keratin, type II cytoskeletal 1 OS=Homo sapiens OX=9606 GN=KRT1 PE=1 SV=6	KRT1	P04264	207.762	55	37	39	382	32	644	66	8.12	0.723453	0.411732	28.552	30.6311	30.0219	27.4804	29.2062	28.1343	31.0587	28.0214	30.3179	30.418
Clusterin OS=Homo sapiens OX=9606 GN=CLU PE=1 SV=1	CLU	P10909	207.107	41	27	28	1002	27	449	52.5	6.27	0.487022	-0.272819	33.5165	33.3216	34.4423	32.336	32.9735	32.9968	32.6498	32.6406	33.1888	33.7498
Keratin, type I cytoskeletal 10 OS=Homo sapiens OX=9606 GN=KRT10 PE=1 SV=6	KRT10	P13645	196.965	52	30	32	353	24	584	58.8	5.21	0.589641	0.711412	27.3805	29.6548	30.2809	25.6497	28.2852	25.9172	30.1349	28.2489	30.6134	29.8938
Fermitin family homolog 3 OS=Homo sapiens OX=9606 GN=FERMT3 PE=1 SV=1	FERMT3	Q86UX7	193.184	51	26	26	602	26	667	75.9	6.98	0.621487	-0.192216	31.167	30.1062	29.0667	30.969	30.8263	30.4882	30.6368	29.9185	29.5249	30.6057
Immunoglobulin heavy constant gamma 2 OS=Homo sapiens OX=9606 GN=IGHG2 PE=1 SV=2	IGHG2	P01859	185.482	60	17	19	711	8	326	35.9	7.59	0.572281	0.730853	30.4471	33.449	30.4809	29.2735	28.1402	32.3952	30.0761	34.9713	28.9484	29.0539
Keratin, type II cytoskeletal 2 epidermal OS=Homo sapiens OX=9606 GN=KRT2 PE=1 SV=2	KRT2	P35908	183.048	57	37	38	240	28	639	65.4	8	0.721399	0.54452	25.3099	28.085	28.6822	25.8046	27.595	24.0943	29.1946	27.1779	29.0828	28.6498
Vinculin OS=Homo sapiens OX=9606 GN=VCL PE=1 SV=4	VCL	P18206	179.846	33	36	36	499	36	1134	123.7	5.66	0.606971	-0.216052	29.9883	29.4451	27.6061	29.8336	30.2249	29.4173	29.2802	28.5814	29.1456	29.5933
Properdin OS=Homo sapiens OX=9606 GN=CFP PE=1 SV=2	CFP	P27918	179.216	34	16	16	808	16	469	51.2	7.9	0.873819	0.0549518	31.8595	32.4758	33.3452	31.8011	31.9001	32.7844	31.6756	31.8162	33.0927	32.2876
Ankyrin-1 OS=Homo sapiens OX=9606 GN=ANK1 PE=1 SV=3	ANK1	P16157	172.454	26	37	37	204	37	1881	206.1	6.01	0.894872	-0.107514	24.0466	27.1759	27.7367	28.2078	25.668	25.727	27.5928	26.0247	25.6925	27.2604
Coagulation factor V OS=Homo sapiens OX=9606 GN=F5 PE=1 SV=4	F5	P12259	172.426	19	36	36	367	36	2224	251.5	6.05	0.360809	-0.34272	28.9997	29.4989	28.9346	28.3162	28.8211	27.7576	28.47	28.8666	28.2973	29.4653
Immunoglobulin heavy constant gamma 1 OS=Homo sapiens OX=9606 GN=IGHG1 PE=1 SV=1	IGHG1	P01857	171.864	65	17	17	503	7	330	36.1	8.19	0.44096	0.695941	28.8915	30.6325	29.313	29.6079	28.0568	30.5647	30.1682	33.0267	28.4836	27.7383
Keratin, type I cytoskeletal 9 OS=Homo sapiens OX=9606 GN=KRT9 PE=1 SV=3	KRT9	P35527	168.76	51	23	24	207	22	623	62	5.24	0.804964	-0.329988	27.2533	28.9801	28.5659	26.3241	28.4127	24.8885	30.1205	25.3171	28.21	29.3499
Spectrin alpha chain, erythrocytic 1 OS=Homo sapiens OX=9606 GN=SPTA1 PE=1 SV=5	SPTA1	P02549	164.724	25	43	43	157	43	2419	279.8	5.05	0.831364	-0.250446	21.5985	26.7967	27.2357	27.9051	24.6531	24.5695	26.9424	25.1665	23.6542	26.6045
Pleckstrin OS=Homo sapiens OX=9606 GN=PLEK PE=1 SV=3	PLEK	P08567	156.293	44	14	14	226	14	350	40.1	8.28	0.880872	0.113805	29.4901	28.5608	25.0235	29.4599	29.4906	29.4353	29.5612	28.0707	27.4641	28.0626
Spectrin beta chain, erythrocytic OS=Homo sapiens OX=9606 GN=SPTB PE=1 SV=5	SPTB	P11277	154.363	22	36	36	145	36	2137	246.3	5.27	0.845974	0.239455	26.9426	30.8444	27.7561	28.2846	25.9235	28.3394	27.6229	32.1719	25.9552	26.8591
Apolipoprotein A-I OS=Homo sapiens OX=9606 GN=APOA1 PE=1 SV=1	APOA1	P02647	152.083	49	24	26	692	24	267	30.8	5.76	0.975037	-0.0123222	31.7109	32.828	33.0858	31.0726	31.2412	31.7028	31.6816	32.1393	32.1702	32.183
Apolipoprotein A-IV OS=Homo sapiens OX=9606 GN=APOA4 PE=1 SV=3	APOA4	P06727	150.481	52	27	27	537	27	396	45.4	5.38	0.775243	0.132329	29.5761	30.0855	32.0334	29.1911	30	30.2113	29.9113	29.9004	30.5396	30.9851
Apolipoprotein E OS=Homo sapiens OX=9606 GN=APOE PE=1 SV=1	APOE	P02649	149.743	63	25	26	638	25	317	36.1	5.73	0.629054	-0.216131	31.6442	31.2678	33.2442	31.2346	31.6998	30.9553	31.6558	30.7472	32.278	32.3736
Tropomyosin alpha-4 chain OS=Homo sapiens OX=9606 GN=TPM4 PE=1 SV=3	TPM4	P67936	149.501	69	26	26	327	8	248	28.5	4.69	0.569137	0.294926	29.5906	28.7332	27.9621	30.2234	30.4235	29.4983	29.6261	30.9704	28.9164	29.3964
Gelsolin OS=Homo sapiens OX=9606 GN=GSN PE=1 SV=1	GSN	P06396	144.427	39	24	24	403	24	782	85.6	6.28	0.904738	0.0471026	29.4858	28.9635	27.3748	29.5549	29.9084	28.9921	29.4553	28.9597	28.8575	29.2584
Myosin-9 OS=Homo sapiens OX=9606 GN=MYH9 PE=1 SV=4	MYH9	P35579	143.785	20	32	32	208	32	1960	226.4	5.6	0.361191	-0.591681	28.5378	31.7526	28.6408	28.3011	28.2808	28.6012	28.2243	28.7312	29.0048	27.9932
Immunoglobulin kappa light chain OS=Homo sapiens OX=9606 PE=1 SV=1	IGK	P0DOX7	139.429	48	11	11	532	3	214	23.4	7.17	0.69657	0.359734	29.5061	32.7343	29.5939	27.5367	27.8053	29.1844	29.3072	31.0645	30.6323	28.7866
Immunoglobulin kappa constant OS=Homo sapiens OX=9606 GN=IGKC PE=1 SV=2	IGKC	P01834	137.265	86	11	11	592	3	107	11.8	6.52	0.9485	0.061751	28.4414	32.0805	29.4342	26.6825	26.8932	28.5505	28.1683	30.0309	29.6295	27.4614
Band 3 anion transport protein OS=Homo sapiens OX=9606 GN=SLC4A1 PE=1 SV=3	SLC4A1	P02730	135.984	30	18	18	363	18	911	101.7	5.19	0.738488	0.215503	27.0969	29.0644	29.7733	29.8893	28.2538	28.5244	29.7978	28.3298	28.7636	29.7397
Complement C5 OS=Homo sapiens OX=9606 GN=C5 PE=1 SV=4	C5	P01031	134.819	25	28	28	245	28	1676	188.2	6.52	0.315142	0.610482	28.6454	28.2362	28.7184	26.8032	27.2392	29.306	27.907	28.2293	30.1909	27.0618
Transferrin receptor protein 1 OS=Homo sapiens OX=9606 GN=TFRC PE=1 SV=2	TFRC	P02786	131.402	28	23	23	355	23	760	84.8	6.61	0.898893	-0.128397	28.3868	30.5921	30.8038	28.4043	27.2584	26.0694	29.72	29.3884	30.371	29.2546
Ras-related protein Rap-1b OS=Homo sapiens OX=9606 GN=RAP1B PE=1 SV=1	RAP1B	P61224	124.906	61	15	15	509	1	184	20.8	5.78	0.742145	-0.12543	31.1087	30.1791	29.1339	31.0039	31.1271	30.7719	30.777	29.8369	30.1565	30.3833
Ras-related protein Rap-1A OS=Homo sapiens OX=9606 GN=RAP1A PE=1 SV=1	RAP1A	P62834	123.48	61	15	15	476	1	184	21	6.67	0.619185	0.193285	21.7398	20.4745	21.6252	21.6294	21.9322	21.4106	21.7265	20.6928	21.9157	22.6219
14-3-3 protein zeta/delta OS=Homo sapiens OX=9606 GN=YWHAZ PE=1 SV=1	YWHAZ	P63104	123.064	61	16	16	318	14	245	27.7	4.79	0.850262	-0.0714124	30.5708	29.7827	28.7398	30.7532	31.0077	30.291	30.344	29.5591	29.9938	30.3091
Coagulation factor XIII A chain OS=Homo sapiens OX=9606 GN=F13A1 PE=1 SV=4	F13A1	P00488	122.739	31	19	19	281	19	732	83.2	6.09	0.892482	-0.0743827	28.8524	28.3366	25.6367	28.9062	29.1002	28.6005	28.3954	27.5676	27.5764	28.3202
Cofilin-1 OS=Homo sapiens OX=9606 GN=CFL1 PE=1 SV=3	CFL1	P23528	119.243	63	11	11	389	11	166	18.5	8.09	0.975241	-0.0175757	30.6841	29.4433	27.4301	30.5995	30.4718	30.0628	30.519	29.1275	29.1108	29.7209
Pyruvate kinase PKM OS=Homo sapiens OX=9606 GN=PKM PE=1 SV=4	PKM	P14618	116.019	44	18	18	239	18	531	57.9	7.84	0.875521	-0.0790568	28.9577	28.2546	26.1886	29.1935	29.0837	28.5625	28.5752	27.3134	28.2644	28.5672
Platelet endothelial cell adhesion molecule OS=Homo sapiens OX=9606 GN=PECAM1 PE=1 SV=2	PECAM1	P16284	114.96	29	18	18	280	18	738	82.5	6.99	0.733929	0.148524	28.6587	27.4122	27.1866	28.8403	29.1363	29.1414	28.7855	27.4812	27.9491	28.6196
Actin, alpha skeletal muscle OS=Homo sapiens OX=9606 GN=ACTA1 PE=1 SV=1	ACTA1	P68133	108.791	32	15	20	893	2	377	42	5.39	0.802853	0.12692	26.3169	25.6024	26.9301	26.9285	27.6055	26.4339	27.3295	25.6519	28.4092	26.1933
Complement component C9 OS=Homo sapiens OX=9606 GN=C9 PE=1 SV=2	C9	P02748	108.417	31	18	18	218	18	559	63.1	5.59	0.291383	0.687209	29.2703	28.9823	29.5007	27.2787	27.7826	30.14	28.7165	29.0363	30.875	27.4829
Immunoglobulin heavy constant gamma 3 OS=Homo sapiens OX=9606 GN=IGHG3 PE=1 SV=2	IGHG3	P01860	107.591	49	16	17	450	5	377	41.3	7.9	0.837747	0.275672	22.475	27.8198	24.6525	23.3105	28.2987	28.1645	25.301	28.4881	22.7192	23.262
CD5 antigen-like OS=Homo sapiens OX=9606 GN=CD5L PE=1 SV=1	CD5L	O43866	105.45	60	17	17	294	17	347	38.1	5.47	0.639049	0.320276	29.0842	30.8196	29.8866	26.9744	27.7847	30.0193	29.3883	29.0757	29.7907	27.8769
C-reactive protein OS=Homo sapiens OX=9606 GN=CRP PE=1 SV=1	CRP	P02741	105.034	36	14	14	760	14	224	25	5.63	0.384551	0.7616	32.4831	32.1805	34.3364	31.8539	34.8136	32.726	34.481	32.2424	36.9019	33.1242
Alpha-enolase OS=Homo sapiens OX=9606 GN=ENO1 PE=1 SV=2	ENO1	P06733	104.568	47	14	14	185	14	434	47.1	7.39	0.22879	-0.504079	28.2753	27.7294	26.2976	28.5373	28.428	27.643	27.6387	26.5375	27.1976	27.7305
LIM and senescent cell antigen-like-containing domain protein 1 OS=Homo sapiens OX=9606 GN=LIMS1 PE=1 SV=4	LIMS1	P48059	102.942	42	10	10	275	10	325	37.2	8.05	0.580571	-0.25041	29.3443	28.4144	26.5505	29.0393	29.14	28.5385	28.6305	27.8677	27.6398	28.5599
Immunoglobulin lambda-1 light chain OS=Homo sapiens OX=9606 PE=1 SV=1	IGLC1	P0DOX8	101.478	52	10	10	441	6	216	22.8	6.76	0.651356	0.64113	29.4626	31.3687	29.562	28.2497	28.275	32.0322	29.8003	34.4493	27.113	26.7288
Isoform 2 of Tropomyosin alpha-4 chain OS=Homo sapiens OX=9606 GN=TPM4	TPM4	P67936-2	100.483	54	19	19	215	1	284	32.7	4.73	0.087016	-1.21953	21.21			20.5387	22.8165	21.2098	19.7915			19.9054
Serum amyloid P-component OS=Homo sapiens OX=9606 GN=APCS PE=1 SV=2	APCS	P02743	97.575	50	15	15	696	15	223	25.4	6.54	0.559957	0.260451	32.5958	32.6716	33.8372	32.786	32.4874	32.7195	33.5055	31.6603	33.5857	34.2092
Immunoglobulin heavy constant alpha 1 OS=Homo sapiens OX=9606 GN=IGHA1 PE=1 SV=2	IGHA1	P01876	96.519	55	14	14	373	9	353	37.6	6.51	0.261522	-0.745826	29.6106	32.3521	30.1236	29.5465	29.0849	29.0356	29.417	31.4895	28.1937	28.8529
Alpha-actinin-4 OS=Homo sapiens OX=9606 GN=ACTN4 PE=1 SV=2	ACTN4	O43707	96.463	25	20	20	192	6	911	104.8	5.44	0.298401	-0.835925	23.8356	22.5797	20.6285	24.6882	24.9537	23.402	23.2869	21.2873	21.4678	23.062
Disintegrin and metalloproteinase domain-containing protein 10 OS=Homo sapiens OX=9606 GN=ADAM10 PE=1 SV=1	ADAM10	O14672	94.726	22	12	12	235	12	748	84.1	7.77	0.438851	0.313498	28.6799	27.1384	28.3509	28.6933	29.3141	29.5119	28.5095	28.3461	28.4235	28.953
Immunoglobulin lambda constant 2 OS=Homo sapiens OX=9606 GN=IGLC2 PE=1 SV=1	IGLC2	P0DOY2	94.057	86	8	8	457	4	106	11.3	7.24	0.981128	-0.0255091	27.3597	29.6227	28.2067	25.7751	26.4885	30.3998	27.8142	28.9416	25.3492	24.8203
Integrin beta-1 OS=Homo sapiens OX=9606 GN=ITGB1 PE=1 SV=2	ITGB1	P05556	93.694	26	19	19	333	19	798	88.4	5.39	0.846363	0.0771109	29.5872	28.0604	27.6549	29.376	29.7689	29.5066	29.1816	28.4886	28.5002	29.1559
Isoform 2 of Tropomyosin alpha-3 chain OS=Homo sapiens OX=9606 GN=TPM3	TPM3	P06753-2	93.482	48	18	18	191	10	248	29	4.78	0.796101	-0.157092	26.2726	26.1835	23.0239	27.0494	27.351	26.1123	25.9888	24.897	25.7914	26.3055
Complement factor H OS=Homo sapiens OX=9606 GN=CFH PE=1 SV=4	CFH	P08603	92.407	19	18	18	181	18	1231	139	6.61	0.401461	0.318177	27.5753	27.711	28.2455	27.0203	26.8063	28.4357	27.3385	27.4126	28.4201	27.3425
Tubulin alpha-4A chain OS=Homo sapiens OX=9606 GN=TUBA4A PE=1 SV=1	TUBA4A	P68366	92.131	38	12	13	254	5	448	49.9	5.06	0.71338	-0.221696	30.09	29.229	26.1858	29.6636	29.206	28.8895	28.7747	28.0855	28.1123	29.4038
Guanine nucleotide-binding protein G(i) subunit alpha-2 OS=Homo sapiens OX=9606 GN=GNAI2 PE=1 SV=3	GNAI2	P04899	90.426	59	15	15	222	11	355	40.4	5.54	0.456206	0.304338	28.8222	28.2741	28.9739	28.948	28.468	27.9947	28.7408	30.7112	28.6243	28.9369
Receptor-type tyrosine-protein phosphatase eta OS=Homo sapiens OX=9606 GN=PTPRJ PE=1 SV=3	PTPRJ	Q12913	90.097	22	20	20	140	20	1337	145.9	5.58	0.963099	0.0168128	28.8944	28.2006	29.3893	28.8294	28.7215	28.7848	29.1728	27.9775	28.4459	29.7383
Prothrombin OS=Homo sapiens OX=9606 GN=F2 PE=1 SV=2	F2	P00734	88.928	33	15	15	161	15	622	70	5.9	0.256807	0.480786	27.0743	27.9968	28.2603	27.2828	27.5527	27.55	29.2999	28.3744	27.7976	27.5489
Inter-alpha-trypsin inhibitor heavy chain H4 OS=Homo sapiens OX=9606 GN=ITIH4 PE=1 SV=4	ITIH4	Q14624	88.591	20	16	16	240	16	930	103.3	6.98	0.512714	0.359197	29.5554	27.3235	28.0698	28.7156	30.7651	30.1731	29.1498	28.9082	28.7133	29.281
Tubulin alpha-1A chain OS=Homo sapiens OX=9606 GN=TUBA1A PE=1 SV=1	TUBA1A	Q71U36	86.38	37	11	12	240	3	451	50.1	5.06	0.493042	-0.412433	28.8312	27.9067	24.9043	28.6766	27.6123	27.3925	27.5229	26.6296	26.6347	27.6891
Immunoglobulin heavy variable 3-72 OS=Homo sapiens OX=9606 GN=IGHV3-72 PE=3 SV=1	IGHV3-72	A0A0B4J1Y9	84.089	66	13	14	178	9	119	13.2	7.85	0.325316	1.32952	27.333	29.244	27.8747	25.2211	26.0275	28.3837	28.1448	33.1962	24.8756	27.7477
Haptoglobin OS=Homo sapiens OX=9606 GN=HP PE=1 SV=1	HP	P00738	82.665	60	20	20	112	12	406	45.2	6.58	0.753791	0.144468	28.5881	28.7938	29.062	29.1073	28.9422	28.4918	29.3772	31.1074	27.8654	28.3739
Keratin, type II cuticular Hb6 OS=Homo sapiens OX=9606 GN=KRT86 PE=1 SV=1	KRT86	O43790	81.545	53	21	22	25	3	486	53.5	5.66	0.905833	-0.124997	22.3914	20.8831	22.1877	23.5799	23.1279	21.9631	23.3618	20.8505	22.5439	22.8257
Tubulin beta-1 chain OS=Homo sapiens OX=9606 GN=TUBB1 PE=1 SV=1	TUBB1	Q9H4B7	81.285	43	14	14	223	14	451	50.3	5.17	0.575184	-0.308905	29.8589	29.0579	26.3519	29.612	29.0869	28.726	28.6882	27.8687	28.1514	28.9888
Tubulin beta chain OS=Homo sapiens OX=9606 GN=TUBB PE=1 SV=2	TUBB	P07437	81.121	42	12	12	168	4	444	49.6	4.89	0.930174	-0.054734	29.2574	28.2674	25.0113	28.8355	28.2162	27.8228	28.1886	27.4037	27.4098	28.4892
Profilin-1 OS=Homo sapiens OX=9606 GN=PFN1 PE=1 SV=2	PFN1	P07737	78.874	75	13	14	313	13	140	15	8.27	0.562084	-0.23348	30.7346	29.8983	28.5462	30.647	30.6521	30.1639	30.0819	29.2831	29.6465	30.1356
Hemoglobin subunit beta OS=Homo sapiens OX=9606 GN=HBB PE=1 SV=2	HBB	P68871	76.194	55	8	9	339	4	147	16	7.28	0.521788	0.326705	28.6134	30.7289	31.2604	31.3933	29.5939	30.0177	31.0877	30.0858	30.5788	31.4536
Isoform 2 of HLA class I histocompatibility antigen, A alpha chain OS=Homo sapiens OX=9606 GN=HLA-A	HLA-A	P04439-2	75.807	47	13	13	168	10	371	41.4	6.3	0.667657	0.15537	28.8205	27.8894	27.626	27.7791	28.0479	28.5747	28.6602	27.7306	28.0154	27.9588
Intelectin-1 OS=Homo sapiens OX=9606 GN=ITLN1 PE=1 SV=1	ITLN1	Q8WWA0	75.704	54	12	12	227	9	313	34.9	6.01	0.998747	-0.00109692	29.5675	31.4533	29.493	26.1339	28.0092	29.4852	29.2429	29.3976	28.2883	28.2376
Hemoglobin subunit alpha OS=Homo sapiens OX=9606 GN=HBA1 PE=1 SV=2	HBA1; HBA2	P69905	75.47	58	7	8	333	7	142	15.2	8.68	0.817138	0.119352	29.7107	31.2904	32.3207	32.1809	30.5816	30.6673	31.6945	30.8136	31.1309	32.3747
Platelet glycoprotein 4 OS=Homo sapiens OX=9606 GN=CD36 PE=1 SV=2	CD36	P16671	74.735	24	12	12	166	12	472	53	7.96	0.493268	-0.737248	27.2157	27.3245	27.339	29.0515	28.7867	28.3553	28.8047	27.2198	28.0417	23.6096
Complement component C7 OS=Homo sapiens OX=9606 GN=C7 PE=1 SV=2	C7	P10643	74.078	30	15	15	94	15	843	93.5	6.48	0.266984	0.665774	27.3338	26.1581	27.5799	25.6912	26.1603	28.2535	26.0771	27.076	28.7426	26.103
HLA class I histocompatibility antigen, B alpha chain OS=Homo sapiens OX=9606 GN=HLA-B PE=1 SV=3	HLA-B	P01889	73.166	47	15	15	189	10	362	40.4	5.85	0.36253	0.458682	28.5765	27.1556	27.8372	28.5767	27.961	28.2341	28.0621	27.2916	28.9165	29.896
Annexin A11 OS=Homo sapiens OX=9606 GN=ANXA11 PE=1 SV=1	ANXA11	P50995	72.207	28	13	13	150	13	505	54.4	7.65	0.435852	0.381415	27.9095	27.0506	25.9136	28.2243	29.1502	29.0608	27.7675	27.6814	28.063	27.5825
Immunoglobulin heavy constant gamma 4 OS=Homo sapiens OX=9606 GN=IGHG4 PE=1 SV=1	IGHG4	P01861	72.116	39	9	9	263	2	327	35.9	7.36	0.607704	-0.678718		24.1	22.4038	26.54	22.9854	21.6313	23.3207	26.2879		22.0745
Annexin A3 OS=Homo sapiens OX=9606 GN=ANXA3 PE=1 SV=3	ANXA3	P12429	70.896	44	13	13	174	13	323	36.4	5.92	0.765699	0.123708	27.4905	27.3567	27.8089	27.5059	28.4346	28.6119	27.6053	27.3082	28.4954	27.1943
Hemopexin OS=Homo sapiens OX=9606 GN=HPX PE=1 SV=2	HPX	P02790	70.271	37	12	12	49	12	462	51.6	7.02	0.524852	0.581537	24.1108	25.8487	25.8118	26.3118	24.4049	24.4732	26.0629	29.6469	23.7568	25.4559
Heat shock cognate 71 kDa protein OS=Homo sapiens OX=9606 GN=HSPA8 PE=1 SV=1	HSPA8	P11142	69.414	25	13	13	230	9	646	70.9	5.52	0.691829	-0.115221	28.802	28.6291	29.5003	28.8297	28.9194	28.3831	28.8444	28.5476	28.9922	29.3371
Moesin OS=Homo sapiens OX=9606 GN=MSN PE=1 SV=3	MSN	P26038	69.174	33	21	21	264	21	577	67.8	6.4	0.229165	-0.340303	28.7243	28.31	28.0021	28.6107	28.6641	28.1491	28.3742	27.5464	28.2003	28.3398
Apolipoprotein C-III OS=Homo sapiens OX=9606 GN=APOC3 PE=1 SV=1	APOC3	P02656	68.636	41	4	4	481	4	99	10.8	5.41	0.842598	0.0812508	33.4809	33.5562	35.3469	33.3777	33.3229	33.718	33.3735	33.1814	34.6646	34.5533
Lactadherin OS=Homo sapiens OX=9606 GN=MFGE8 PE=1 SV=3	MFGE8	Q08431	67.488	43	12	12	134	12	387	43.1	8.15	0.914645	0.0500595	27.5823	27.7328	29.6013	27.1956	27.7873	27.7507	27.9532	27.5485	28.4053	28.4919
CD9 antigen OS=Homo sapiens OX=9606 GN=CD9 PE=1 SV=4	CD9	P21926	66.025	20	5	5	205	5	228	25.4	7.15	0.415145	0.332006	30.6866	29.374	28.7373	30.4077	30.9217	31.1146	30.8045	29.6828	30.067	30.1184
Erythrocyte band 7 integral membrane protein OS=Homo sapiens OX=9606 GN=STOM PE=1 SV=3	STOM	P27105	65.819	50	13	14	195	13	288	31.7	7.88	0.173655	0.35163	27.9533	27.6934	27.8309	27.7926	28.2273	28.3203	28.1862	27.8874	28.4094	28.4522
Immunoglobulin J chain OS=Homo sapiens OX=9606 GN=JCHAIN PE=1 SV=4	JCHAIN	P01591	65.373	52	9	9	194	9	159	18.1	5.24	0.922811	0.0708282	28.5463	30.4396	29.5209	26.2406	26.9484	29.308	28.5151	28.562	28.3583	27.3066
Adenylyl cyclase-associated protein 1 OS=Homo sapiens OX=9606 GN=CAP1 PE=1 SV=5	CAP1	Q01518	64.708	32	16	16	118	16	475	51.9	8.06	0.7427	-0.170162	27.6875	27.0756	24.3995	27.794	27.5983	27.0657	27.117	26.0749	26.5627	26.8837
Keratin, type II cytoskeletal 6A OS=Homo sapiens OX=9606 GN=KRT6A PE=1 SV=3	KRT6A	P02538	64.538	27	17	17	92	6	564	60	8	0.884775	0.147199	22.4033	23.8057	24.8694	23.1841	22.771	21.7288	27.055	22.3739	22.5847	24.0271
Integrin alpha-2 OS=Homo sapiens OX=9606 GN=ITGA2 PE=1 SV=1	ITGA2	P17301	64.38	18	15	15	100	15	1181	129.2	5.31	0.784197	0.132958	27.3388	25.8631	24.2256	26.6708	25.9737	26.4166	25.9642	25.7747	25.8945	26.6868
Keratin, type II cuticular Hb1 OS=Homo sapiens OX=9606 GN=KRT81 PE=1 SV=3	KRT81	Q14533	63.881	40	18	19	21	1	505	54.9	5.47	0.218769	1.6317				19.4022			21.0339
Tubulin beta-4B chain OS=Homo sapiens OX=9606 GN=TUBB4B PE=1 SV=1	TUBB4B	P68371	63.208	35	10	10	108	2	445	49.8	4.89	0.354156	-0.606421	24.6106	22.6653	20.5285	24.2892	23.6747	22.7294	22.8611	21.956	21.8506	23.3392
Vitamin K-dependent protein S OS=Homo sapiens OX=9606 GN=PROS1 PE=1 SV=1	PROS1	P07225	62.197	25	12	12	113	12	676	75.1	5.67	0.838935	-0.0708479	27.1243	26.9551	26.3144	26.3876	27.0642	26.2437	27.6335	26.3305	26.1338	27.1499
Complement component C8 beta chain OS=Homo sapiens OX=9606 GN=C8B PE=1 SV=3	C8B	P07358	61.463	24	10	10	97	10	591	67	8.13	0.276304	0.851277	27.0854	26.1834	26.2449	24.8187	25.3473	28.1179	26.2426	26.4451	28.4331	24.6975
Alpha-2-HS-glycoprotein OS=Homo sapiens OX=9606 GN=AHSG PE=1 SV=2	AHSG	P02765	61.323	46	11	12	126	11	367	39.3	5.72	0.228579	0.677125	26.4965	27.7827	27.5779	27.0642	25.7857	26.5968	27.6873	29.5294	27.3229	26.9563
Guanine nucleotide-binding protein G(I)/G(S)/G(T) subunit beta-1 OS=Homo sapiens OX=9606 GN=GNB1 PE=1 SV=3	GNB1	P62873	61.057	40	11	11	144	7	340	37.4	6	0.28183	-0.321676	28.2381	27.6124	27.7695	28.0261	28.1349	27.6065	27.9691	26.9212	27.7354	27.9404
Fructose-bisphosphate aldolase A OS=Homo sapiens OX=9606 GN=ALDOA PE=1 SV=2	ALDOA	P04075	59.62	48	14	14	175	12	364	39.4	8.09	0.580665	-0.258719	29.4456	28.4002	26.7779	29.2721	29.646	29.1398	28.651	27.9158	28.0499	28.4918
Keratin, type I cuticular Ha1 OS=Homo sapiens OX=9606 GN=KRT31 PE=1 SV=3	KRT31	Q15323	57.419	39	14	14	29	6	416	47.2	4.88	0.912895	0.112077	21.2958	23.5045	21.2097	22.5573	21.4331	21.7452	22.2657	23.2434	21.1287	22.1778
Proto-oncogene tyrosine-protein kinase Src OS=Homo sapiens OX=9606 GN=SRC PE=1 SV=3	SRC	P12931	57.173	27	11	11	138	11	536	59.8	7.42	0.526268	-0.237355	28.2682	27.0603	26.4067	28.152	28.0447	27.7113	27.5208	27.0366	26.7995	27.6767
Immunoglobulin kappa variable 1-17 OS=Homo sapiens OX=9606 GN=IGKV1-17 PE=1 SV=2	IGKV1-17	P01599	56	32	6	6	50	3	117	12.8	8.68	0.436966	-2.18107	19.7764	32.7435	25.5983	21.0895		21.4203	19.7381	25.6363	23.6887
Glyceraldehyde-3-phosphate dehydrogenase OS=Homo sapiens OX=9606 GN=GAPDH PE=1 SV=3	GAPDH	P04406	55.848	34	9	9	176	9	335	36	8.46	0.689074	-0.118526	28.5371	28.3851	27.5572	28.7922	28.998	28.3787	28.3056	27.9123	28.4017	28.6787
Vitamin D-binding protein OS=Homo sapiens OX=9606 GN=GC PE=1 SV=2	GC	P02774	55.843	41	15	15	52	15	474	52.9	5.45	0.743943	0.299087	23.4629	23.6985	25.5328	25.7037	24.0155	22.4042	24.8004	28.6078	23.6261	24.4704
Immunoglobulin alpha-2 heavy chain OS=Homo sapiens OX=9606 PE=1 SV=2	IGHA2	P0DOX2	55.442	26	9	9	161	3	455	48.9	6.67	0.377725	1.07036	24.9346	25.8082	26.7827	22.5975	24.006	24.8622	24.9004	27.0017	29.4882	23.2283
Isoform 5 of Tropomyosin alpha-1 chain OS=Homo sapiens OX=9606 GN=TPM1	TPM1	P09493-5	54.866	25	9	9	114	1	245	28.4	4.77	0.877909	0.0807176	22.7435	22.0893	20.9855	23.6268	24.0262	23.183	22.6084	21.9894	23.4352	22.6589
Syntaxin-binding protein 2 OS=Homo sapiens OX=9606 GN=STXBP2 PE=1 SV=2	STXBP2	Q15833	54.359	26	12	12	89	12	593	66.4	6.55	0.860657	-0.0737081	26.5528	25.5944	24.966	26.7801	27.1607	26.3142	26.732	25.453	25.79	26.3962
Isoform 8 of Tropomyosin alpha-1 chain OS=Homo sapiens OX=9606 GN=TPM1	TPM1	P09493-8	54.196	25	10	10	105	2	284	32.8	4.75	0.405642	-0.370157	23.4459	22.3428	22.3335	24.0658	24.5992	23.5004	22.2455	22.9392	22.8219	23.4295
Keratin, type II cytoskeletal 5 OS=Homo sapiens OX=9606 GN=KRT5 PE=1 SV=3	KRT5	P13647	54.039	22	16	16	100	7	590	62.3	7.74	0.738208	0.292779	24.4009	22.9612	27.218	24.0414	24.6269	23.9434	25.6739	23.5532	25.4354	26.1063
Syntenin-1 OS=Homo sapiens OX=9606 GN=SDCBP PE=1 SV=1	SDCBP	O00560	53.947	42	8	8	97	8	298	32.4	7.53	0.136492	0.595794	27.1749	25.4824	26.2404	25.9504	26.3002	27.1212	26.995	26.5594	25.9308	27.5209
Haptoglobin-related protein OS=Homo sapiens OX=9606 GN=HPR PE=2 SV=2	HPR	P00739	53.607	42	13	13	88	5	348	39	7.09	0.982301	0.0132827	25.1421	26.6971	26.4577	24.355	23.3699	25.5353	26.0416	25.7323	24.1316	24.6474
Keratin, type I cuticular Ha3-II OS=Homo sapiens OX=9606 GN=KRT33B PE=1 SV=3	KRT33B	Q14525	52.476	38	13	13	29	4	404	46.2	4.84	0.42875	-1.19467			21.4082			20.2165	20.5642		19.8598
Keratin, type I cytoskeletal 14 OS=Homo sapiens OX=9606 GN=KRT14 PE=1 SV=4	KRT14	P02533	52.076	38	15	15	72	6	472	51.5	5.16	0.277701	1.36055	22.3174	25.5222	26.9058	22.3783	24.2404	23.386	26.9837	26.635	24.8689	26.2933
Complement C1r subcomponent OS=Homo sapiens OX=9606 GN=C1R PE=1 SV=2	C1R	P00736	51.932	23	9	9	32	9	705	80.1	6.21	0.517064	1.0442	23.3083	23.8539	20.3483		25.9629	24.6119	23.0463	25.8932	28.713	19.7984
Complement component C8 alpha chain OS=Homo sapiens OX=9606 GN=C8A PE=1 SV=2	C8A	P07357	51.834	28	9	9	64	9	584	65.1	6.47	0.352281	0.697418	26.6001	25.3664	26.6432	24.1281	24.7577	27.3992	25.404	25.6532	27.836	24.6902
Actin-related protein 2/3 complex subunit 1B OS=Homo sapiens OX=9606 GN=ARPC1B PE=1 SV=3	ARPC1B	O15143	51.459	46	12	12	68	12	372	40.9	8.35	0.552871	0.400394	27.0683	26.1524	23.0858	27.5802	27.7695	26.9011	27.3155	26.5599	26.1759	26.7057
Beta-actin-like protein 2 OS=Homo sapiens OX=9606 GN=ACTBL2 PE=1 SV=2	ACTBL2	Q562R1	51.32	24	11	14	318	2	376	42	5.59	0.0378965	-1.44733	21.6435			22.08	22.3484	21.3691	19.8441	19.9675	20.5781	21.1245
HLA class I histocompatibility antigen, C alpha chain OS=Homo sapiens OX=9606 GN=HLA-C PE=1 SV=3	HLA-C	P10321	51.149	38	10	10	125	4	366	40.6	6.04	0.209196	-1.45103	25.5241	21.8281	25.3434		25.4389	24.3079	21.5159	21.1628	23.1649	25.2615
Actin-related protein 3 OS=Homo sapiens OX=9606 GN=ACTR3 PE=1 SV=3	ACTR3	P61158	48.97	49	15	15	131	15	418	47.3	5.88	0.703915	0.244383	27.3175	25.8353	23.5664	27.6653	27.8296	27.0371	27.1206	26.2001	26.0828	26.9954
Coronin-1C OS=Homo sapiens OX=9606 GN=CORO1C PE=1 SV=1	CORO1C	Q9ULV4	48.327	30	11	11	88	11	474	53.2	7.08	0.837054	0.139895	27.1809	26.0448	23.3288	27.723	28.0721	27.3156	27.331	25.9999	25.7343	26.6684
Coagulation factor X OS=Homo sapiens OX=9606 GN=F10 PE=1 SV=2	F10	P00742	48.072	22	8	8	66	8	488	54.7	5.94	0.419469	-0.371533	26.5718	27.7755	26.9111	25.9448	26.3104	25.1795	26.0577	26.7415	26.4023	27.2751
C4b-binding protein alpha chain OS=Homo sapiens OX=9606 GN=C4BPA PE=1 SV=2	C4BPA	P04003	47.883	17	8	8	107	8	597	67	7.3	0.398987	0.419375	26.5124	27.6452	27.0813	24.7488	26.4117	26.9311	26.8132	27.2309	27.5474	25.9737
Vitronectin OS=Homo sapiens OX=9606 GN=VTN PE=1 SV=1	VTN	P04004	47.693	23	8	8	226	8	478	54.3	5.8	0.0867813	0.65104	27.8147	28.3391	28.5151	27.1197	27.0901	28.2014	28.5103	28.4668	28.9341	28.0213
Peptidyl-prolyl cis-trans isomerase A OS=Homo sapiens OX=9606 GN=PPIA PE=1 SV=2	PPIA	P62937	47.549	56	9	9	173	9	165	18	7.81	0.700391	-0.193506	29.4757	28.6418	27.0653	29.6509	29.9307	29.1777	29.6178	28.2258	28.1192	28.6561
Ras-related protein Rab-14 OS=Homo sapiens OX=9606 GN=RAB14 PE=1 SV=4	RAB14	P61106	47.069	63	12	12	76	10	215	23.9	6.21	0.953631	0.0236312	27.1674	27.2267	27.4439	27.3464	27.7217	27.1033	27.9817	26.5125	27.5332	27.8935
Ceruloplasmin OS=Homo sapiens OX=9606 GN=CP PE=1 SV=1	CP	P00450	47.056	18	15	15	43	15	1065	122.1	5.72	0.436696	0.611763	24.1496	22.9389	26.3154	24.8487	23.7559	23.4421	24.9291	28.3161	23.7498	24.6302
Cell division control protein 42 homolog OS=Homo sapiens OX=9606 GN=CDC42 PE=1 SV=2	CDC42	P60953	46.895	59	9	9	167	8	191	21.2	6.55	0.802588	0.073223	28.2683	27.7609	27.7046	27.7695	27.7982	28.4944	28.0429	27.0447	28.2003	27.8853
Keratin, type II cuticular Hb3 OS=Homo sapiens OX=9606 GN=KRT83 PE=1 SV=2	KRT83	P78385	46.55	29	14	14	15	2	493	54.2	5.64
Keratin, type II cuticular Hb5 OS=Homo sapiens OX=9606 GN=KRT85 PE=1 SV=1	KRT85	P78386	46.376	30	14	15	15	5	507	55.8	6.55	0.929456	0.14708	17.8864			22.9025	21.5818			19.861		22.0137
Complement component C6 OS=Homo sapiens OX=9606 GN=C6 PE=1 SV=3	C6	P13671	46.182	19	14	14	106	14	934	104.7	6.76	0.266061	0.623521	27.4082	26.4679	27.5521	25.7187	26.5116	28.121	26.7706	27.1019	28.7739	26.0087
Annexin A4 OS=Homo sapiens OX=9606 GN=ANXA4 PE=1 SV=4	ANXA4	P09525	45.818	34	8	8	87	8	319	35.9	6.13	0.719157	0.309162	26.2769	24.5641	24.1081	26.4941	27.5249	27.6116	27.3549	22.9576	26.5951	25.9947
Complement component C8 gamma chain OS=Homo sapiens OX=9606 GN=C8G PE=1 SV=3	C8G	P07360	44.19	46	7	7	77	7	202	22.3	8.31	0.303307	0.67007	27.5032	26.8416	27.0205	25.5481	25.9192	28.2243	26.8584	26.8191	28.654	25.627
Coronin-1A OS=Homo sapiens OX=9606 GN=CORO1A PE=1 SV=4	CORO1A	P31146	43.983	40	11	11	91	11	461	51	6.68	0.981938	-0.00990885	27.2625	25.9855	24.6737	26.9502	27.2854	26.7098	26.7275	26.1701	26.1067	26.3936
Keratin, type I cuticular Ha4 OS=Homo sapiens OX=9606 GN=KRT34 PE=1 SV=2	KRT34	O76011	43.248	23	8	8	12	2	436	49.4	5.06			21.8016		20.9853	18.9487
Protein tweety homolog 3 OS=Homo sapiens OX=9606 GN=TTYH3 PE=1 SV=3	TTYH3	Q9C0H2	42.236	19	8	8	106	8	523	57.5	5.39	0.3036	0.631092	27.1731	24.2466	26.8074	26.066	26.7829	27.7157	26.1574	26.7446	25.8474	27.7663
Ras-related protein Rab-7a OS=Homo sapiens OX=9606 GN=RAB7A PE=1 SV=1	RAB7A	P51149	42.104	48	8	8	112	8	207	23.5	6.7	0.545129	-0.187387	27.6556	26.7825	26.8942	27.6004	27.7651	27.2764	27.4144	26.5788	26.8918	27.5995
Isoform LMW of Kininogen-1 OS=Homo sapiens OX=9606 GN=KNG1	KNG1	P01042-2	40.388	30	8	8	49	8	427	47.9	6.65	0.0803193	1.11823	24.2366	25.5446	26.446	25.529	23.839	25.4494	26.4523	28.5648	24.9355	25.7842
Hemoglobin subunit delta OS=Homo sapiens OX=9606 GN=HBD PE=1 SV=2	HBD	P02042	40.213	36	5	5	145	1	147	16	8.05	0.106772	0.969162	22.0912			24.2888	22.8887	23.6458	23.9197		24.1682	24.5012
Platelet basic protein OS=Homo sapiens OX=9606 GN=PPBP PE=1 SV=3	PPBP	P02775	40.078	41	6	6	132	6	128	13.9	8.79	0.465465	0.277183	27.6117	27.7694	27.8888	27.1992	27.7837	27.1945	27.6302	27.9799	28.9477	27.8864
14-3-3 protein eta OS=Homo sapiens OX=9606 GN=YWHAH PE=1 SV=4	YWHAH	Q04917	39.551	32	9	9	111	7	246	28.2	4.84	0.726132	-0.145964	27.1059	26.3548	25.2016	27.4007	27.5499	26.825	26.6664	25.8125	26.5633	27.0158
Metalloreductase STEAP3 OS=Homo sapiens OX=9606 GN=STEAP3 PE=1 SV=2	STEAP3	Q658P3	39.461	17	7	7	54	7	488	54.6	8.6	0.162192	0.830424	24.5185	25.673	27.5704	26.3866	24.9556	25.2862	26.5247	27.0055	26.7224	27.7173
Peroxiredoxin-2 OS=Homo sapiens OX=9606 GN=PRDX2 PE=1 SV=5	PRDX2	P32119	39.282	47	8	8	92	7	198	21.9	5.97	0.470347	-0.500815	23.4032	26.322	26.427	27.9375	25.0577	24.8798	26.4053	24.6983	24.1957	26.4643
Immunoglobulin kappa variable 1-6 OS=Homo sapiens OX=9606 GN=IGKV1-6 PE=3 SV=1	IGKV1-6	A0A0C4DH72	39.027	32	4	4	37	1	117	12.7	8.29	0.252393	-2.05403		25.9281	24.9581			20.6322		26.1459
Apolipoprotein A-II OS=Homo sapiens OX=9606 GN=APOA2 PE=1 SV=1	APOA2	P02652	38.949	61	6	7	133	6	100	11.2	6.62	0.971226	0.0117301	28.412	28.1789	29.1545	27.3043	27.8977	28.6319	27.7902	27.9396	28.0984	28.546
Junctional adhesion molecule A OS=Homo sapiens OX=9606 GN=F11R PE=1 SV=1	F11R	Q9Y624	38.064	31	10	10	127	10	299	32.6	7.9	0.901406	0.0355692	28.2297	27.6529	27.0464	28.1433	28.1188	28.0385	27.9732	28.0178	27.6302	27.7092
Phosphoglycerate kinase 1 OS=Homo sapiens OX=9606 GN=PGK1 PE=1 SV=3	PGK1	P00558	38.06	23	7	7	67	7	417	44.6	8.1	0.981025	0.00883714	27.1129	26.4773	26.6903	26.7697	27.1899	27.5213	25.7985	26.4705	27.9956	26.4983
Heat shock 70 kDa protein 1B OS=Homo sapiens OX=9606 GN=HSPA1B PE=1 SV=1	HSPA1B	P0DMV9	37.705	22	11	11	119	8	641	70	5.66	0.390978	-0.317513	25.1358	24.7702	25.5701	25.2844	25.0681	24.8933	24.7546	23.7873	25.1105	25.6954
Ras GTPase-activating protein 3 OS=Homo sapiens OX=9606 GN=RASA3 PE=1 SV=3	RASA3	Q14644	37.551	18	10	10	43	10	834	95.6	7.15	0.541472	-0.264777	26.628	25.2925	24.1943	26.4716	26.2094	25.6386	25.9104	25.1079	24.9743	25.8408
Integrin-linked protein kinase OS=Homo sapiens OX=9606 GN=ILK PE=1 SV=2	ILK	Q13418	37.498	30	8	8	81	8	452	51.4	8.07	0.925305	-0.047912	27.8141	26.3817	24.8492	27.6975	27.6225	27.5011	27.1313	26.637	25.8993	26.9568
Complement C1s subcomponent OS=Homo sapiens OX=9606 GN=C1S PE=1 SV=1	C1S	P09871	37.275	20	9	9	36	8	688	76.6	4.96	0.278227	1.62025	24.4634	25.8363	22.9055	17.9641	26.5527	25.4272	23.8713	26.4447	28.8465	21.2335
Platelet factor 4 OS=Homo sapiens OX=9606 GN=PF4 PE=1 SV=2	PF4	P02776	37.181	40	8	8	155	4	101	10.8	8.62	0.302336	0.53425	29.0643	29.1408	28.9326	28.5362	29.1307	28.3153	28.7245	29.0962	31.2951	30.0448
Tubulin alpha-8 chain OS=Homo sapiens OX=9606 GN=TUBA8 PE=1 SV=1	TUBA8	Q9NY65	36.89	17	5	5	92	1	449	50.1	5.06	0.0878277	-1.06044	23.6175	23.0981		23.5889	22.764	21.4916	22.6298	22.0535	21.1663	23.6922
Ras-related protein Rab-1B OS=Homo sapiens OX=9606 GN=RAB1B PE=1 SV=1	RAB1B	Q9H0U4	36.501	45	7	7	72	1	201	22.2	5.73	0.196431	-1.08374	23.3621			23.5908	23.7448	23.4954	23.6328	21.6119	21.449	22.2218
Serum amyloid A-1 protein OS=Homo sapiens OX=9606 GN=SAA1 PE=1 SV=1	SAA1	P0DJI8	36.446	66	6	6	32	4	122	13.5	6.79	0.0288198	1.9895	24.233	22.4761	24.527	23.2204	23.0728	25.1292	24.7711	23.5444	29.5832	24.4488
Alpha-1-antitrypsin OS=Homo sapiens OX=9606 GN=SERPINA1 PE=1 SV=3	SERPINA1	P01009	36.326	16	10	10	49	10	418	46.7	5.59	0.810837	0.0976122	29.7341	28.6611	28.5174	29.9195	30.0003	29.455	28.7519	30.5473	29.0353	29.531
Inter-alpha-trypsin inhibitor heavy chain H2 OS=Homo sapiens OX=9606 GN=ITIH2 PE=1 SV=2	ITIH2	P19823	36.028	14	9	9	13	9	946	106.4	6.86	0.154849	1.33057	21.4995	21.8155	23.7535	23.1587	21.7212	21.3645	23.6174	28.1261	21.9164	23.5768
Platelet glycoprotein IX OS=Homo sapiens OX=9606 GN=GP9 PE=1 SV=3	GP9	P14770	35.803	31	5	5	132	5	177	19	6.34	0.701827	0.169787	27.9839	27.1562	25.8766	28.3298	28.7404	27.8979	28.3085	27.1844	27.8189	27.7261
Cytoplasmic FMR1-interacting protein 1 OS=Homo sapiens OX=9606 GN=CYFIP1 PE=1 SV=1	CYFIP1	Q7L576	35.594	8	9	9	95	9	1253	145.1	6.9	0.942382	-0.0315491	27.167	25.861	24.974	26.9971	27.5464	26.9657	26.905	25.8566	26.0223	26.6382
Programmed cell death 6-interacting protein OS=Homo sapiens OX=9606 GN=PDCD6IP PE=1 SV=1	PDCD6IP	Q8WUM4	35.019	19	10	10	43	10	868	96	6.52	0.374191	0.389852	25.6304	23.759	25.3819	24.5364	24.9726	25.4757	25.0238	24.713	24.8198	26.1972
Endoplasmic reticulum chaperone BiP OS=Homo sapiens OX=9606 GN=HSPA5 PE=1 SV=2	HSPA5	P11021	34.943	15	8	8	78	6	654	72.3	5.16	0.994594	0.00253303	24.898	24.5705	23.5693	25.4476	25.8206	24.8024	25.175	24.1242	24.9002	25.3168
Multimerin-1 OS=Homo sapiens OX=9606 GN=MMRN1 PE=1 SV=3	MMRN1	Q13201	34.852	12	10	10	41	10	1228	138	7.93	0.838399	0.12281	26.5132	23.9757		24.1445	26.1653	24.25	25.8525	26.0684	24.7601	25.6814
Ras-related protein Rab-1A OS=Homo sapiens OX=9606 GN=RAB1A PE=1 SV=3	RAB1A	P62820	34.85	44	7	7	69	1	205	22.7	6.21	0.998844	0.000619424	26.8326	25.8403	25.0205	26.6501	26.7667	26.8154	26.4578	24.938	26.3795	26.5225
Ras suppressor protein 1 OS=Homo sapiens OX=9606 GN=RSU1 PE=1 SV=3	RSU1	Q15404	34.616	26	7	7	76	7	277	31.5	8.65	0.409419	0.448892	27.389	26.2315	24.0706	26.7966	26.6673	27.6163	27.197	26.1147	25.8166	26.6549
Intelectin-2 OS=Homo sapiens OX=9606 GN=ITLN2 PE=2 SV=1	ITLN2	Q8WWU7	34.492	22	4	4	114	1	325	36.2	8.28	0.769444	-0.315928	25.768	27.251			23.8422	25.8812		24.7278
Annexin A7 OS=Homo sapiens OX=9606 GN=ANXA7 PE=1 SV=3	ANXA7	P20073	34.277	16	7	7	97	7	488	52.7	5.68	0.628028	0.255294	27.0711	26.4103	25.345	27.4684	28.4407	28.4775	27.12	26.9314	27.1155	26.3676
Immunoglobulin lambda variable 1-51 OS=Homo sapiens OX=9606 GN=IGLV1-51 PE=1 SV=2	IGLV1-51	P01701	34.182	18	4	4	76	4	117	12.2	7.03	0.161889	3.13423	22.4541	26.3001	22.8629	22.1201	18.6766	28.1011	24.5593	33.511	21.8729	20.0407
Alpha-1-antichymotrypsin OS=Homo sapiens OX=9606 GN=SERPINA3 PE=1 SV=2	SERPINA3	P01011	34.073	18	6	6	38	6	423	47.6	5.52	0.301701	0.840863	22.4756	24.3043	25.3409	25.1016	22.8061	22.4507	24.8922	28.2427	24.114	24.5332
Aquaporin-1 OS=Homo sapiens OX=9606 GN=AQP1 PE=1 SV=3	AQP1	P29972	34.053	23	4	4	61	4	269	28.5	7.42	0.293319	0.629112	24.2361	23.4162	26.8564	25.4286	25.0975	25.5588	26.3393	24.4247	25.7108	26.1466
POTE ankyrin domain family member J OS=Homo sapiens OX=9606 GN=POTEJ PE=3 SV=1	POTEJ	P0CG39	33.703	8	6	6	179	2	1038	117.3	5.97	0.208093	-0.761585	23.49			23.3732	23.2319	21.6008	23.3429			22.8666
Prolow-density lipoprotein receptor-related protein 1 OS=Homo sapiens OX=9606 GN=LRP1 PE=1 SV=2	LRP1	Q07954	33.343	2	9	9	33	9	4544	504.3	5.39	0.215769	1.02622	24.9748	22.1581	23.3668	24.4403	20.5892	25.1975	23.9398	23.6302	22.5789	25.314
Keratin, type I cytoskeletal 13 OS=Homo sapiens OX=9606 GN=KRT13 PE=1 SV=4	KRT13	P13646	33.056	20	9	9	39	5	458	49.6	4.96	0.0321645	3.79368	20.1543		21.8501	21.1165	21.8388	21.5665	27.0959	32.3286	22.8129	21.3642
Platelet glycoprotein Ib beta chain OS=Homo sapiens OX=9606 GN=GP1BB PE=1 SV=1	GP1BB	P13224	32.791	29	8	8	184	8	206	21.7	9.31	0.851746	0.080612	29.7619	28.9311	27.6612	30.0223	30.3499	29.5208	30.0596	28.714	29.3035	29.5316
Guanine nucleotide-binding protein G(q) subunit alpha OS=Homo sapiens OX=9606 GN=GNAQ PE=1 SV=4	GNAQ	P50148	32.664	23	6	6	71	6	359	42.1	5.68	0.486764	-0.23878	26.6911	25.9016	25.3437	26.8386	26.8555	26.3007	26.415	25.4009	25.9314	26.3886
Guanine nucleotide-binding protein G(i) subunit alpha OS=Homo sapiens OX=9606 GN=GNAI3 PE=1 SV=3	GNAI3	P08754	32.397	24	6	6	99	2	354	40.5	5.69	0.563242	-0.272189	23.6682	21.9693	24.0734	23.3322	23.2109	22.5836	23.2834	21.6501	23.5128	23.8631
Apolipoprotein(a) OS=Homo sapiens OX=9606 GN=LPA PE=1 SV=1	LPA	P08519	32.382	28	10	10	121	10	4548	501	5.88	0.827054	-0.10963	27.092	28.183	30.1199	27.3819	28.0631	27.7937	27.1926	28.3883	27.9494	28.9677
Platelet factor 4 variant OS=Homo sapiens OX=9606 GN=PF4V1 PE=1 SV=1	PF4V1	P10720	32.324	53	6	6	160	2	104	11.5	9.1	0.945636	0.0358354	24.9888	24.262	25.7849	24.5903	25.3348	23.6878	24.9309	24.1305	26.374	26.017
Ras-related protein Rab-10 OS=Homo sapiens OX=9606 GN=RAB10 PE=1 SV=1	RAB10	P61026	32.257	38	7	7	69	4	200	22.5	8.38	0.860042	-0.062141	25.968	25.0957	24.3342	25.6505	25.9104	25.8924	25.6168	24.5356	25.3349	25.2684
Myc target protein 1 OS=Homo sapiens OX=9606 GN=MYCT1 PE=1 SV=1	MYCT1	Q8N699	31.545	27	8	8	98	8	235	26.6	9.83	0.363173	0.528082	28.1435	24.9368	27.678	26.9248	27.4118	28.0616	27.3555	27.2427	26.4699	28.6057
Transforming protein RhoA OS=Homo sapiens OX=9606 GN=RHOA PE=1 SV=1	RHOA	P61586	31.522	40	6	6	79	1	193	21.8	6.1	0.299074	0.991819	23.3563	22.0945		19.342	20.413	23.2511	22.4624	21.2568	22.2028
Guanine nucleotide-binding protein subunit beta-4 OS=Homo sapiens OX=9606 GN=GNB4 PE=1 SV=3	GNB4	Q9HAV0	31.248	30	7	7	85	3	340	37.5	6	0.46333	-0.274085	24.9078	24.086	22.8181	24.4299	24.3678	24.2993	24.2284	23.3165	24.0175	23.3774
Syntaxin-7 OS=Homo sapiens OX=9606 GN=STX7 PE=1 SV=4	STX7	O15400	31.026	32	6	6	80	6	261	29.8	5.55	0.176296	0.494067	26.375	25.7797	27.435	26.5335	26.7364	27.0482	27.2032	26.3448	27.2231	27.5106
14-3-3 protein epsilon OS=Homo sapiens OX=9606 GN=YWHAE PE=1 SV=1	YWHAE	P62258	30.995	22	6	6	83	5	255	29.2	4.74	0.820503	-0.0936775	26.907	25.691	25.1104	27.3096	27.3376	26.4675	26.7329	25.8284	26.2246	26.6337
Immunoglobulin heavy variable 3-23 OS=Homo sapiens OX=9606 GN=IGHV3-23 PE=1 SV=2	IGHV3-23	P01764	30.881	45	5	5	30	4	117	12.6	8.28	0.932321	0.109232	24.1267	25.5695	25.6179	22.0593		27.558	21.3434	25.7532	23.1558
Coactosin-like protein OS=Homo sapiens OX=9606 GN=COTL1 PE=1 SV=3	COTL1	Q14019	30.844	61	8	8	79	8	142	15.9	5.67	0.804324	-0.1783	27.4845	26.7966	22.4009	26.7053	27.066	26.3151	26.6673	25.6862	25.0309	25.8624
Rho-related GTP-binding protein RhoC OS=Homo sapiens OX=9606 GN=RHOC PE=1 SV=1	RHOC	P08134	30.638	34	6	6	77	1	193	22	6.58	0.355688	-0.338626	27.1198	26.7195	25.9847	27.3323	27.198	26.7041	27.0008	25.588	26.5883	26.78
Carbonic anhydrase 1 OS=Homo sapiens OX=9606 GN=CA1 PE=1 SV=2	CA1	P00915	30.489	28	5	5	65	5	261	28.9	7.12	0.403068	0.477156	23.2245	24.6765	26.158	25.3004	24.3932	24.4076	25.8266	24.3574	25.0172	26.5294
Copine-1 OS=Homo sapiens OX=9606 GN=CPNE1 PE=1 SV=1	CPNE1	Q99829	30.432	15	6	6	42	6	537	59	5.83	0.1064	1.1498	22.9101	23.6266	21.1319	23.4531	25.6435	26.0755	24.5317	24.1428	24.4316	23.3325
Keratin, type II cytoskeletal 75 OS=Homo sapiens OX=9606 GN=KRT75 PE=1 SV=2	KRT75	O95678	30.265	11	8	8	45	1	551	59.5	7.74										23.3427	21.8919
Keratin, type I cytoskeletal 16 OS=Homo sapiens OX=9606 GN=KRT16 PE=1 SV=4	KRT16	P08779	30.199	22	10	10	54	1	473	51.2	5.05	0.8537	0.219993		23.3202	20.0939				21.9835			21.8706
14-3-3 protein beta/alpha OS=Homo sapiens OX=9606 GN=YWHAB PE=1 SV=3	YWHAB	P31946	29.8	28	7	7	75	4	246	28.1	4.83	0.376619	-0.357973	25.4421	23.7141	24.5378	25.7805	25.9586	25.1889	24.4911	24.1829	24.7846	24.9958
Sodium/potassium-transporting ATPase subunit alpha-1 OS=Homo sapiens OX=9606 GN=ATP1A1 PE=1 SV=1	ATP1A1	P05023	29.122	12	8	8	44	8	1023	112.8	5.49	0.106523	-0.80936	25.217	25.5804	26.4629	24.9244	24.6761	24.0111	25.3138	23.1504	24.8542	25.4843
Fibronectin OS=Homo sapiens OX=9606 GN=FN1 PE=1 SV=5	FN1	P02751	29.075	6	10	10	17	10	2477	272.2	5.5	0.612038	0.403088	24.9777	22.3285	23.6873	22.2495	22.1302	22.6412	22.6135	26.251	22.4398	23.4431
Ras-related C3 botulinum toxin substrate 2 OS=Homo sapiens OX=9606 GN=RAC2 PE=1 SV=1	RAC2	P15153	28.954	41	8	8	113	4	192	21.4	7.61	0.454856	-0.238115	28.0688	27.2106	27.6416	28.145	28.5127	27.631	27.6137	27.0712	27.9341	28.138
Thymosin beta-4 OS=Homo sapiens OX=9606 GN=TMSB4X PE=1 SV=2	TMSB4X	P62328	28.412	55	4	4	63	4	44	5.1	5.06	0.134985	-0.550082	27.1843	25.9212	26.0622	27.1096	27.2472	26.4862	25.5735	25.7142	26.1107	26.8894
Transthyretin OS=Homo sapiens OX=9606 GN=TTR PE=1 SV=1	TTR	P02766	28.392	69	7	7	24	7	147	15.9	5.76	0.0643819	1.45058	24.5965	23.5111	22.8121	24.8486	21.727	24.5592	25.3874	27.3523	23.2768	24.1725
Ras-related C3 botulinum toxin substrate 1 OS=Homo sapiens OX=9606 GN=RAC1 PE=1 SV=1	RAC1	P63000	28.357	38	7	7	115	3	192	21.4	8.5	0.390054	-0.307205	26.1989	25.463	24.9913	26.0826	26.3835	25.658	25.98	24.7779	24.9611	26.2063
L-lactate dehydrogenase B chain OS=Homo sapiens OX=9606 GN=LDHB PE=1 SV=2	LDHB	P07195	28.356	31	8	8	79	7	334	36.6	6.05	0.57614	-0.206679	27.4356	26.8643	25.8455	27.6415	27.8827	27.058	26.6687	26.4419	27.0729	27.3946
14-3-3 protein gamma OS=Homo sapiens OX=9606 GN=YWHAG PE=1 SV=2	YWHAG	P61981	28.307	21	6	6	105	4	247	28.3	4.89	0.596744	-0.204022	26.5039	25.6919	24.9217	26.7003	26.9646	26.1344	25.7774	25.2772	26.0077	26.5656
Solute carrier family 2, facilitated glucose transporter member 3 OS=Homo sapiens OX=9606 GN=SLC2A3 PE=1 SV=1	SLC2A3	P11169	28.18	13	6	6	118	6	496	53.9	7.2	0.966929	-0.0168848	28.4939	27.0751	26.0166	27.8989	28.3036	28.0046	27.6485	26.9568	27.3161	27.7779
FH1/FH2 domain-containing protein 1 OS=Homo sapiens OX=9606 GN=FHOD1 PE=1 SV=3	FHOD1	Q9Y613	27.947	8	6	6	30	6	1164	126.5	6.39	0.601505	0.462476	25.9602	23.5061	19.9553	25.736	24.9489	24.9842	25.1002	23.8033	23.373	25.1582
Complement C1q subcomponent subunit C OS=Homo sapiens OX=9606 GN=C1QC PE=1 SV=3	C1QC	P02747	27.839	27	6	6	43	6	245	25.8	8.41	0.487763	0.925114	25.3387	25.7112	24.5016	22.4746	28.1027	26.2678	25.326	27.4979	30.1418	21.5209
Tetraspanin-9 OS=Homo sapiens OX=9606 GN=TSPAN9 PE=1 SV=1	TSPAN9	O75954	27.697	17	3	3	60	3	239	26.8	7.68	0.180334	0.71567	26.7689	23.8485	24.9273	25.9152	26.1544	27.1638	26.3674	25.8231	25.2076	26.6308
Ubiquitin-60S ribosomal protein L40 OS=Homo sapiens OX=9606 GN=UBA52 PE=1 SV=2	UBA52	P62987	27.386	37	5	5	134	5	128	14.7	9.83	0.560047	0.228698	28.1433	26.9775	28.5525	27.4584	28.2798	28.593	27.8597	27.5667	27.7803	28.7551
Oncoprotein-induced transcript 3 protein OS=Homo sapiens OX=9606 GN=OIT3 PE=1 SV=2	OIT3	Q8WWZ8	26.979	15	7	7	33	7	545	60	5.58	0.651117	-0.404703	27.0605	25.9615	25.9811	24.9228	24.9158	25.8726	23.5884	26.7337	25.2382	25.3853
Ras-related protein Rab-8A OS=Homo sapiens OX=9606 GN=RAB8A PE=1 SV=1	RAB8A	P61006	26.902	31	7	7	45	4	207	23.7	9.07	0.643377	-0.143727	27.0447	26.6411	26.0094	27.2873	27.2746	26.8582	26.8763	26.0157	26.5804	27.2078
PDZ and LIM domain protein 1 OS=Homo sapiens OX=9606 GN=PDLIM1 PE=1 SV=4	PDLIM1	O00151	26.681	21	7	7	45	7	329	36	7.02	0.900059	0.072529	25.9669	25.1854	23.0494	26.6703	27.2442	25.7065	26.4127	25.3558	25.0699	25.9338
cAMP-dependent protein kinase type I-alpha regulatory subunit OS=Homo sapiens OX=9606 GN=PRKAR1A PE=1 SV=1	PRKAR1A	P10644	26.388	25	6	6	33	6	381	43	5.35	0.406454	-0.506855	26.1175	24.1433	22.4389	25.5676	25.0508	24.4291	24.9783	22.457	23.8154	25.1039
Catalase OS=Homo sapiens OX=9606 GN=CAT PE=1 SV=3	CAT	P04040	26.344	18	6	6	20	6	527	59.7	7.39	0.193511	-0.954905	22.4778	24.2023	24.1311	25.7632	23.4514	22.4943	23.8851	22.7601	21.7514	24.3603
Guanine nucleotide-binding protein G(I)/G(S)/G(T) subunit beta-2 OS=Homo sapiens OX=9606 GN=GNB2 PE=1 SV=3	GNB2	P62879	26.046	24	7	7	81	2	340	37.3	6	0.413871	-0.267557	25.666	24.9412	26.1006	25.5047	25.6409	25.0928	24.9876	24.71	25.7492	25.976
Peroxiredoxin-6 OS=Homo sapiens OX=9606 GN=PRDX6 PE=1 SV=3	PRDX6	P30041	25.665	40	6	6	32	6	224	25	6.38	0.483493	-0.338965	25.3958	25.1055	23.324	26.212	26.2075	24.9391	25.8009	24.4511	24.3241	25.0347
Rab GDP dissociation inhibitor beta OS=Homo sapiens OX=9606 GN=GDI2 PE=1 SV=2	GDI2	P50395	25.511	17	5	5	32	2	445	50.6	6.47	0.194949	-0.445432	24.4526	24.736	23.188	24.631	24.5145	23.5551	24.1976	23.404	23.6472	24.491
Beta-2-microglobulin OS=Homo sapiens OX=9606 GN=B2M PE=1 SV=1	B2M	P61769	25.349	41	5	5	122	5	119	13.7	6.52	0.61551	-0.166927	27.8815	27.1169	27.3303	27.3918	27.5769	27.4798	27.2172	26.4749	27.6497	27.6412
Annexin A5 OS=Homo sapiens OX=9606 GN=ANXA5 PE=1 SV=2	ANXA5	P08758	25.314	21	4	4	56	4	320	35.9	5.05	0.702521	0.207713	24.738	24.6366	22.7567	25.2082	25.9151	25.5624	24.7337	24.2801	24.7029	25.0143
Superoxide dismutase [Cu-Zn] OS=Homo sapiens OX=9606 GN=SOD1 PE=1 SV=2	SOD1	P00441	25.133	36	3	3	30	3	154	15.9	6.13	0.00592017	-2.44113	25.0137	22.9197		25.6913	24.9278	23.465	23.7656	20.5382	20.1398	23.0763
Syntaxin-11 OS=Homo sapiens OX=9606 GN=STX11 PE=1 SV=1	STX11	O75558	25.126	23	6	6	40	6	287	33.2	6.55	0.452493	-0.266488	25.8235	25.1124	24.3765	25.958	26.1503	25.2822	25.671	24.3783	25.1513	25.6054
Receptor-type tyrosine-protein phosphatase C OS=Homo sapiens OX=9606 GN=PTPRC PE=1 SV=3	PTPRC	P08575	25.047	9	8	8	65	8	1306	147.4	6.15	0.512281	-0.236404	26.2823	25.7313	26.9022	25.6853	25.4584	25.7964	25.7597	24.9121	26.2986	26.1107
Complement factor H-related protein 5 OS=Homo sapiens OX=9606 GN=CFHR5 PE=1 SV=1	CFHR5	Q9BXR6	24.829	17	8	8	50	8	569	64.4	7.06	0.878688	0.0821844	25.967	26.0677	28.0647	25.7574	24.7837	27.1842	25.7931	25.0348	26.4774	26.562
Tyrosine-protein kinase Lyn OS=Homo sapiens OX=9606 GN=LYN PE=1 SV=3	LYN	P07948	24.676	18	7	7	53	7	512	58.5	7.11	0.429542	-0.252374	26.2712	25.6792	25.2921	26.1741	26.0926	26.1436	25.3495	25.1393	25.7763	25.8387
Zyxin OS=Homo sapiens OX=9606 GN=ZYX PE=1 SV=1	ZYX	Q15942	24.538	15	6	6	60	6	572	61.2	6.67	0.983727	-0.0124843	26.3165	24.0465	23.1493	26.3194	26.581	25.8061	24.6995	25.3484	24.6158	25.8804
Cysteine and glycine-rich protein 1 OS=Homo sapiens OX=9606 GN=CSRP1 PE=1 SV=3	CSRP1	P21291	24.403	32	4	4	26	4	193	20.6	8.57	0.0624168	-1.6186	25.0795	23.5199		25.2163	25.7456	24.246	24.27	22.9555	21.5252	23.3619
Megakaryocyte and platelet inhibitory receptor G6b OS=Homo sapiens OX=9606 GN=MPIG6B PE=1 SV=1	MPIG6B	O95866	24.357	21	4	4	75	4	241	26.1	9.61	0.798596	-0.101199	27.4073	26.8636	26.4373	27.2068	26.9986	27.4456	27.6634	26.5875	25.8097	26.9012
Annexin A6 OS=Homo sapiens OX=9606 GN=ANXA6 PE=1 SV=3	ANXA6	P08133	24.25	17	7	7	23	7	673	75.8	5.6	0.252645	-0.513528	24.1946	24.1151	24.2619	24.411	24.6828	24.4813	24.1708	22.0803	24.2526	24.1127
Pituitary tumor-transforming gene 1 protein-interacting protein OS=Homo sapiens OX=9606 GN=PTTG1IP PE=1 SV=1	PTTG1IP	P53801	23.972	17	2	2	158	2	180	20.3	8.79	0.243304	0.545676	28.0739	25.8373	26.7174	27.6497	28.0078	28.7515	27.8752	27.3507	26.9663	28.0706
Apolipoprotein C-II OS=Homo sapiens OX=9606 GN=APOC2 PE=1 SV=1	APOC2	P02655	23.889	50	3	4	44	3	101	11.3	4.72	0.719184	0.258927	26.0694	25.8595	24.3075	25.8218	25.0002	26.245	26.3318	24.5735	27.1008	24.1019
Rab GDP dissociation inhibitor alpha OS=Homo sapiens OX=9606 GN=GDI1 PE=1 SV=2	GDI1	P31150	23.809	26	6	6	22	3	447	50.6	5.14	0.983919	-0.015369	25.4229	24.1939	20.6004	25.3128	24.9122	24.4845	24.6121	23.792	23.3716	24.1053
Beta-2-glycoprotein 1 OS=Homo sapiens OX=9606 GN=APOH PE=1 SV=3	APOH	P02749	23.278	22	5	5	67	5	345	38.3	7.97	0.613517	0.42259	23.4644	25.8269	26.1764	25.3703	23.9188	21.8776	27.0506	26.765	25.3447	25.8319
Erythrocyte membrane protein band 4.2 OS=Homo sapiens OX=9606 GN=EPB42 PE=1 SV=3	EPB42	P16452	22.938	16	7	7	30	7	691	77	8.09	0.933864	-0.0733928	20.7	24.3407	24.8434	25.2719	23.3227	22.4079	25.0851	23.0452	22.8796	24.694
Rho-related GTP-binding protein RhoG OS=Homo sapiens OX=9606 GN=RHOG PE=1 SV=1	RHOG	P84095	22.694	44	5	5	48	4	191	21.3	8.12	0.346319	-0.535031	24.9179	22.5242	23.1068	24.1499	24.3442	23.3419	23.3613	21.8298	23.5378	24.2969
Sorcin OS=Homo sapiens OX=9606 GN=SRI PE=1 SV=1	SRI	P30626	22.576	28	4	4	75	4	198	21.7	5.59	0.473592	0.297204	26.7042	25.9269	25.6279	27.1068	28.023	27.8958	26.8422	26.5229	26.9551	26.6589
Complement C1q subcomponent subunit B OS=Homo sapiens OX=9606 GN=C1QB PE=1 SV=3	C1QB	P02746	22.566	18	5	5	25	5	253	26.7	8.63	0.149286	1.72094	22.9447	24.1657	21.8051	21.2539	26.7385	24.7453	24.0091	25.5805	28.3328	22.845
Isoform 1 of Four and a half LIM domains protein 1 OS=Homo sapiens OX=9606 GN=FHL1	FHL1	Q13642-1	22.425	33	7	7	33	7	280	31.9	8.32	0.045792	-1.19375	25.547	24.6573	22.83	24.6251	25.7486	23.6966	24.1506	22.1435	22.6669	24.7816
Isoform 2 of Mannan-binding lectin serine protease 1 OS=Homo sapiens OX=9606 GN=MASP1	MASP1	P48740-2	21.963	13	7	7	17	6	728	81.8	5.12	0.0552831	-2.04828	25.622	23.8483	22.6978	24.3581	25.7267	21.3788	24.3218	20.8525	21.1112	24.3471
Matrix Gla protein OS=Homo sapiens OX=9606 GN=MGP PE=1 SV=2	MGP	P08493	21.864	24	3	4	95	3	103	12.3	9.67	0.346506	-0.576848	28.5153	29.0903	30.4357	27.0817	27.1599	27.3808	27.2119	27.7313	27.8183	29.2564
Protein disulfide-isomerase A3 OS=Homo sapiens OX=9606 GN=PDIA3 PE=1 SV=4	PDIA3	P30101	21.775	20	7	7	47	7	505	56.7	6.35	0.787037	0.182048	25.0838	23.9143	21.1793	25.5471	25.7452	25.3638	24.7099	23.3247	24.5593	24.4222
Transgelin-2 OS=Homo sapiens OX=9606 GN=TAGLN2 PE=1 SV=3	TAGLN2	P37802	21.726	36	7	7	63	7	199	22.4	8.25	0.896984	-0.0621651	26.4757	25.378	24.1988	26.6313	26.8435	26.704	26.2287	25.1519	25.2071	25.9247
Actin-related protein 2 OS=Homo sapiens OX=9606 GN=ACTR2 PE=1 SV=1	ACTR2	P61160	21.588	11	3	3	39	3	394	44.7	6.74	0.735114	-0.160972	25.4624	23.9363	23.8233	25.4962	25.5715	25.0372	25.5417	24.3275	23.7771	24.8014
Heat shock protein HSP 90-alpha OS=Homo sapiens OX=9606 GN=HSP90AA1 PE=1 SV=5	HSP90AA1	P07900	21.383	13	8	8	26	5	732	84.6	5.02	0.365037	-0.384478	24.7482	24.3042	23.4687	25.4687	25.3037	24.3549	24.294	23.3244	24.6464	24.7514
Copine-3 OS=Homo sapiens OX=9606 GN=CPNE3 PE=1 SV=1	CPNE3	O75131	21.381	13	4	4	17	4	537	60.1	5.85	0.896532	0.0574015	24.2132	22.6887	23.4501	24.182	24.836	24.9625	24.0376	23.3928	23.2752	23.9889
Serum paraoxonase/arylesterase 1 OS=Homo sapiens OX=9606 GN=PON1 PE=1 SV=3	PON1	P27169	21.178	23	6	6	88	6	355	39.7	5.22	0.464072	-0.313475	26.6235	26.6809	28.3169	26.5827	26.6314	26.2212	26.6902	26.7364	26.017	27.6033
P2X purinoceptor 1 OS=Homo sapiens OX=9606 GN=P2RX1 PE=1 SV=1	P2RX1	P51575	20.978	22	5	5	39	5	399	45	8.47	0.645792	0.205073	25.3205	24.0071	22.5504	24.8308	24.9802	25.0622	24.6008	24.0246	24.1539	24.873
Immunoglobulin heavy variable 3-15 OS=Homo sapiens OX=9606 GN=IGHV3-15 PE=3 SV=1	IGHV3-15	A0A0B4J1V0	20.831	30	5	5	101	1	119	12.9	8.62	0.885161	-0.196742	22.458		21.858	18.0088		21.552	19.1601	21.7989		19.8017
Secreted phosphoprotein 24 OS=Homo sapiens OX=9606 GN=SPP2 PE=1 SV=1	SPP2	Q13103	20.781	23	5	5	50	5	211	24.3	8.32	0.439286	-0.378141	25.7844	26.9177	27.6321	25.506	26.5538	27.2368	26.2551	25.5854	25.2045	26.2216
Alpha-1B-glycoprotein OS=Homo sapiens OX=9606 GN=A1BG PE=1 SV=4	A1BG	P04217	20.596	19	7	7	10	7	495	54.2	5.86	0.316047	0.555046	24.2734	25.8905	26.6656	24.8381	24.9081	25.1053	25.421	27.8244	25.468	25.5322
Annexin A1 OS=Homo sapiens OX=9606 GN=ANXA1 PE=1 SV=2	ANXA1	P04083	20.589	19	4	4	18	4	346	38.7	7.02	0.637005	0.264594	23.4661	22.8893	24.4947	23.7152	22.9574	23.8614	24.0276	23.1797	24.2731	23.5039
Protein 4.1 OS=Homo sapiens OX=9606 GN=EPB41 PE=1 SV=4	EPB41	P11171	20.557	11	6	6	26	6	864	97	5.58	0.450166	-0.604004	22.6782	23.9692	24.9395	25.3148	23.2492	23.6378	24.7854	21.984	21.808	24.9157
Isoform 3 of FYN-binding protein 1 OS=Homo sapiens OX=9606 GN=FYB1	FYB1	O15117-3	20.339	10	6	6	32	6	839	91.6	6.9	0.943448	-0.0244311	26.9837	26.8217	27.3772	26.4824	26.0297	26.8666	26.7865	25.6852	26.981	27.2534
Glycophorin-C OS=Homo sapiens OX=9606 GN=GYPC PE=1 SV=1	GYPC	P04921	20.245	21	2	2	39	2	128	13.8	4.84	0.69374	0.252081	23.416	24.6472	25.7033	24.9671	24.3461	23.2241	25.3603	24.082	25.5916	26.082
Flotillin-2 OS=Homo sapiens OX=9606 GN=FLOT2 PE=1 SV=2	FLOT2	Q14254	20.191	15	6	6	36	6	428	47	5.25	0.273634	0.843855	24.1229	22.2885	25.1635	24.9848	24.6281	24.7818	25.3892	23.1559	25.8916	26.1888
L-lactate dehydrogenase A chain OS=Homo sapiens OX=9606 GN=LDHA PE=1 SV=2	LDHA	P00338	20.025	20	5	5	43	4	332	36.7	8.27	0.490516	-0.272972	25.0231	24.6686	23.9837	25.4122	25.8642	24.3551	24.732	24.3275	24.885	25.2872
Guanine nucleotide-binding protein G(z) subunit alpha OS=Homo sapiens OX=9606 GN=GNAZ PE=1 SV=3	GNAZ	P19086	20.022	19	5	5	35	5	355	40.9	7.61	0.986193	-0.00907067	25.6323	24.8131	22.4037	25.7155	25.4945	25.1224	25.3541	24.0847	24.3538	25.0987
14-3-3 protein theta OS=Homo sapiens OX=9606 GN=YWHAQ PE=1 SV=1	YWHAQ	P27348	19.936	29	7	7	68	4	245	27.7	4.78	0.702459	-0.14396	24.7547	24.0086	23.9317	25.2665	25.2258	24.6528	24.6961	23.6092	24.5451	24.9643
Calmodulin-3 OS=Homo sapiens OX=9606 GN=CALM3 PE=1 SV=1	CALM3	P0DP25	19.931	22	2	2	58	2	149	16.8	4.22	0.100084	-0.488601	26.4053	26.1771	26.1159	26.696	26.9983	25.9432	26.1814	25.434	25.9155	26.4754
N-acetylmuramoyl-L-alanine amidase OS=Homo sapiens OX=9606 GN=PGLYRP2 PE=1 SV=1	PGLYRP2	Q96PD5	19.543	18	5	5	15	5	576	62.2	7.55	0.0311469	1.62523	22.0559	22.8032	23.529	21.6009	20.5669	22.9917	24.9588	25.9694	22.4223	22.3398
Microtubule-associated protein RP/EB family member 2 OS=Homo sapiens OX=9606 GN=MAPRE2 PE=1 SV=1	MAPRE2	Q15555	19.487	15	3	3	13	3	327	37	5.57	0.984014	-0.0191261	25.4835	25.0048	19.1931	25.6962	25.0277	24.1026	24.4677	23.3898	22.9726	25.377
CD59 glycoprotein OS=Homo sapiens OX=9606 GN=CD59 PE=1 SV=1	CD59	P13987	19.209	26	4	4	63	4	128	14.2	6.48	0.730617	0.159577	25.4764	26.1175	28.1318	26.5426	26.5254	26.3046	26.8919	25.8936	26.8542	27.6473
Vasodilator-stimulated phosphoprotein OS=Homo sapiens OX=9606 GN=VASP PE=1 SV=3	VASP	P50552	19.11	17	5	5	31	5	380	39.8	8.94	0.252421	-0.588866	25.2777	24.1101		25.4053	25.4593	24.7908	24.8188	24.3505	23.3115	25.0996
Glutathione S-transferase P OS=Homo sapiens OX=9606 GN=GSTP1 PE=1 SV=2	GSTP1	P09211	19.015	30	4	4	35	4	210	23.3	5.64	0.453012	-0.333814	25.0713	25.0108	23.5425	25.4628	25.7364	25.0479	24.8234	23.4867	24.4387	25.3581
F-actin-capping protein subunit beta OS=Homo sapiens OX=9606 GN=CAPZB PE=1 SV=4	CAPZB	P47756	18.999	18	3	3	13	3	277	31.3	5.59	0.496924	-0.310918	25.3117	24.6035	23.0793	25.2902	25.2468	24.4992	25.2981	23.5298	23.6727	24.9772
Solute carrier family 2, facilitated glucose transporter member 1 OS=Homo sapiens OX=9606 GN=SLC2A1 PE=1 SV=2	SLC2A1	P11166	18.987	15	6	6	83	6	492	54	8.72	0.413632	0.448519	26.0124	27.4197	28.7964	27.8249	27.0862	27.1094	28.2225	27.0175	27.9988	29.0339
Integrin beta-2 OS=Homo sapiens OX=9606 GN=ITGB2 PE=1 SV=2	ITGB2	P05107	18.943	9	5	5	39	5	769	84.7	6.95	0.299529	-0.533337	24.4579	23.3915	25.4034	23.7342	23.7677	23.747	22.858	22.3496	24.2944	24.8391
Transitional endoplasmic reticulum ATPase OS=Homo sapiens OX=9606 GN=VCP PE=1 SV=4	VCP	P55072	18.768	17	7	7	28	7	806	89.3	5.26	0.849095	-0.0931141	24.1898	24.9956	22.7111	25.3728	24.7509	24.2276	24.4717	23.7838	24.5067	24.5648
P-selectin OS=Homo sapiens OX=9606 GN=SELP PE=1 SV=3	SELP	P16109	18.655	6	3	3	29	3	830	90.8	6.6	0.892499	0.0626852	25.363	24.2146	24.5338	25.7005	26.6685	25.8783	25.9061	25.149	24.2746	25.5858
Fructose-bisphosphate aldolase C OS=Homo sapiens OX=9606 GN=ALDOC PE=1 SV=2	ALDOC	P09972	18.554	15	4	4	28	2	364	39.4	6.87	0.378804	-0.558142	24.7248	24.2197	21.358	24.5465	24.6744	23.9646	23.662	21.1409	23.6833	24.2819
Actin-related protein 2/3 complex subunit 4 OS=Homo sapiens OX=9606 GN=ARPC4 PE=1 SV=3	ARPC4	P59998	18.55	28	5	5	67	5	168	19.7	8.43	0.805354	0.136841	27.0717	26.0072	23.9553	27.6043	27.8181	26.8198	27.1467	26.0286	26.2366	26.9091
Plasminogen OS=Homo sapiens OX=9606 GN=PLG PE=1 SV=2	PLG	P00747	18.478	12	6	6	12	6	810	90.5	7.24	0.6229	0.331947	22.9103	25.0536	24.5463	24.0858	21.7671	23.1879	23.0473	26.4871	23.9207	23.3798
Myosin light polypeptide 6 OS=Homo sapiens OX=9606 GN=MYL6 PE=1 SV=2	MYL6	P60660	17.825	30	4	4	52	4	151	16.9	4.65	0.569661	-0.223971	25.9623	25.848	24.8376	26.4965	26.6672	25.9737	25.9141	24.8928	26.0138	25.8973
ATP-binding cassette sub-family B member 6, mitochondrial OS=Homo sapiens OX=9606 GN=ABCB6 PE=1 SV=1	ABCB6	Q9NP58	17.792	9	5	5	17	5	842	93.8	8.48	0.154651	0.699465	22.7306	23.1183	24.2148	24.2872	23.7014	24.0397	24.8118	23.0196	24.6544	25.0241
EH domain-containing protein 1 OS=Homo sapiens OX=9606 GN=EHD1 PE=1 SV=2	EHD1	Q9H4M9	17.776	11	4	4	28	3	534	60.6	6.83	0.687137	-0.238258	24.6191	22.7902	22.0686	24.8811	24.9219	24.8983	23.7786	23.6178	23.1814	22.6136
Keratin, type II cuticular Hb4 OS=Homo sapiens OX=9606 GN=KRT84 PE=2 SV=2	KRT84	Q9NSB2	17.571	11	5	5	5	4	600	64.8	7.56
Histidine-rich glycoprotein OS=Homo sapiens OX=9606 GN=HRG PE=1 SV=1	HRG	P04196	17.219	15	6	6	16	6	525	59.5	7.5	0.10897	1.01682	23.0736	23.6913	23.0844	22.5975	22.0365	23.1022	23.7384	26.3247	23.4266	22.9754
ADP-ribosylation factor 3 OS=Homo sapiens OX=9606 GN=ARF3 PE=1 SV=2	ARF3	P61204	17.127	24	3	3	24	3	181	20.6	7.43	0.703748	-0.412499	25.1598	23.5306		25.4647	25.3094	25.3886	25.4874	23.8681	24.2256	23.2985
Immunoglobulin kappa variable 3-20 OS=Homo sapiens OX=9606 GN=IGKV3-20 PE=1 SV=2	IGKV3-20	P01619	16.794	47	4	4	22	4	116	12.5	4.96	0.993625	-0.00664742	26.7504	26.5176	26.1352	26.8446	26.8859	26.6271	27.7426	27.4572	26.2391	25.0344
Inverted formin-2 OS=Homo sapiens OX=9606 GN=INF2 PE=1 SV=2	INF2	Q27J81	16.677	4	4	4	25	4	1249	135.5	5.38	0.192389	-1.05896	23.5137	22.4843		23.7411	23.9101	23.7601	23.0926	21.6655	21.445	21.8034
Calreticulin OS=Homo sapiens OX=9606 GN=CALR PE=1 SV=1	CALR	P27797	16.586	18	5	5	16	5	417	48.1	4.44	0.839105	-0.117164	23.9273	23.62	21.2747	24.6501	24.9451	24.3695	23.8581	22.2435	23.6503	23.7099
Annexin A2 OS=Homo sapiens OX=9606 GN=ANXA2 PE=1 SV=2	ANXA2	P07355	16.558	20	5	5	19	5	339	38.6	7.75	0.907233	-0.0508516	23.3946	23.9006	25.3321	23.0566	23.5694	23.8084	23.8688	22.972	24.0569	24.2929
F-actin-capping protein subunit alpha-1 OS=Homo sapiens OX=9606 GN=CAPZA1 PE=1 SV=3	CAPZA1	P52907	16.544	19	3	3	34	3	286	32.9	5.69	0.82334	-0.114572	26.2062	25.4371	23.7336	26.2603	26.1353	25.7394	25.6528	24.9967	25.1043	25.7064
Carbonic anhydrase 2 OS=Homo sapiens OX=9606 GN=CA2 PE=1 SV=2	CA2	P00918	16.472	27	5	5	28	5	260	29.2	7.4	0.44343	-0.357429	25.6442	24.6064	24.3424	26.0414	25.6734	25.2921	25.1951	23.2536	24.643	26.1369
Flotillin-1 OS=Homo sapiens OX=9606 GN=FLOT1 PE=1 SV=3	FLOT1	O75955	16.321	14	5	5	39	5	427	47.3	7.49	0.779597	0.207097	23.7827	23.0185	24.6168	23.9903	23.9621	24.7601	24.5409	20.7957	25.0802	25.2289
Immunoglobulin superfamily member 8 OS=Homo sapiens OX=9606 GN=IGSF8 PE=1 SV=1	IGSF8	Q969P0	16.174	13	6	6	32	6	613	65	8	0.0732217	0.789182	24.8349	24.5156	25.9232	24.7259	24.9881	25.9605	25.418	24.7433	25.5053	27.3065
EH domain-containing protein 3 OS=Homo sapiens OX=9606 GN=EHD3 PE=1 SV=2	EHD3	Q9NZN3	15.886	10	5	5	21	4	535	60.8	6.57	0.93534	-0.0408715	24.846	23.4814	22.2497	25.3222	25.2363	24.5081	24.7117	23.4999	24.0175	24.1939
Rho-related GTP-binding protein RhoB OS=Homo sapiens OX=9606 GN=RHOB PE=1 SV=1	RHOB	P62745	15.88	26	3	3	51	1	196	22.1	5.24			18.5873					17.8544	22.5762	21.5563
Actin-related protein 2/3 complex subunit 2 OS=Homo sapiens OX=9606 GN=ARPC2 PE=1 SV=1	ARPC2	O15144	15.815	14	3	3	50	3	300	34.3	7.36	0.911734	0.0629871	25.7217	24.6518	22.6211	26.2953	26.407	25.2669	25.603	24.7244	24.7338	25.6836
Twinfilin-2 OS=Homo sapiens OX=9606 GN=TWF2 PE=1 SV=2	TWF2	Q6IBS0	15.694	17	3	3	11	3	349	39.5	6.84	0.233805	-1.45189	24.2963	19.4674		24.6025	24.2421	23.6745	24.2863	18.4615	19.2716	22.8071
Calpain-1 catalytic subunit OS=Homo sapiens OX=9606 GN=CAPN1 PE=1 SV=1	CAPN1	P07384	15.677	8	5	5	22	5	714	81.8	5.67	0.413995	-0.34899	25.3076	23.8429	24.6971	25.5586	25.8639	24.9729	25.0041	23.4188	24.9486	25.1808
Destrin OS=Homo sapiens OX=9606 GN=DSTN PE=1 SV=3	DSTN	P60981	15.386	30	4	4	23	4	165	18.5	7.85	0.751789	-0.269207	25.8512	23.6721		25.6135	25.5257	25.02	25.8137	22.5237	25.7366	25.3881
Isoform 2 of Triosephosphate isomerase OS=Homo sapiens OX=9606 GN=TPI1	HEL-S-49; LOC117800142; TPI1	P60174-1	15.29	19	4	4	26	4	249	26.7	6.9	0.111898	-0.723785	24.4642	23.6403	23.6033	24.8483	25.1873	23.2183	23.2427	23.2237	23.5559	24.8838
HLA class I histocompatibility antigen, alpha chain E OS=Homo sapiens OX=9606 GN=HLA-E PE=1 SV=4	HLA-E	P13747	15.27	16	5	5	36	2	358	40	5.83	0.681807	0.534104	19.0854	24.3974	24.5097	20.5993	18.8805		21.1827	23.6015	21.7486	21.5814
Drebrin-like protein OS=Homo sapiens OX=9606 GN=DBNL PE=1 SV=1	DBNL	Q9UJU6	15.218	8	3	3	11	3	430	48.2	5.05	0.140535	-1.31776	24.102	24.8592		24.2058	22.8762	23.1545	22.9939			21.9307
Ras-related protein Rab-8B OS=Homo sapiens OX=9606 GN=RAB8B PE=1 SV=2	RAB8B	Q92930	15.043	18	4	4	7	1	207	23.6	9.07	0.580351	-0.368598	23.0386		21.6586	22.617		22.7979		20.22	22.9975	22.2624
Immunoglobulin lambda variable 8-61 OS=Homo sapiens OX=9606 GN=IGLV8-61 PE=3 SV=7	IGLV8-61	A0A075B6I0	14.98	20	3	3	20	3	122	12.8	4.55	0.882101	0.6188		27.9899	22.5479			30.779	20.9964
Ficolin-2 OS=Homo sapiens OX=9606 GN=FCN2 PE=1 SV=2	FCN2	Q15485	14.973	20	4	4	5	4	313	34	6.77	0.00856543	-6.21116			21.4559		25.5963		17.5932			17.0367
High affinity immunoglobulin epsilon receptor subunit gamma OS=Homo sapiens OX=9606 GN=FCER1G PE=1 SV=1	FCER1G	P30273	14.742	28	4	4	45	4	86	9.7	7.12	0.792477	-0.102531	25.9875	24.5196	25.5478	25.4622	26.1112	26.0072	24.6581	25.3983	25.2292	25.8228
Immunoglobulin heavy variable 3-73 OS=Homo sapiens OX=9606 GN=IGHV3-73 PE=3 SV=1	IGHV3-73	A0A0B4J1V6	14.73	24	4	4	81	1	119	12.8	9.17	0.542443	0.849123		22.2308	22.6125	19.8454				22.412
Immunoglobulin kappa variable 2-30 OS=Homo sapiens OX=9606 GN=IGKV2-30 PE=3 SV=2	IGKV2-30	P06310	14.705	20	3	3	24	2	120	13.2	8.51	0.408182	-0.70039	25.3764	26.1224	27.7589	23.0086	23.0574	24.2142	24.8873	26.0861	23.5043	23.1298
Tetraspanin-14 OS=Homo sapiens OX=9606 GN=TSPAN14 PE=1 SV=1	TSPAN14	Q8NG11	14.668	14	4	4	37	4	270	30.7	6.84	0.385236	0.459413	26.2816	23.3554	25.5179	26.0403	26.5922	27.1228	25.2112	25.7894	25.6524	26.3088
Ras-related protein Rab-6B OS=Homo sapiens OX=9606 GN=RAB6B PE=1 SV=1	RAB6B	Q9NRW1	14.361	16	4	4	23	1	208	23.4	5.53	0.734797	-0.204504	22.6546			22.9467	23.2373	23.6491	22.3734		22.5813	22.363
Keratin, type II cytoskeletal 1b OS=Homo sapiens OX=9606 GN=KRT77 PE=2 SV=3	KRT77	Q7Z794	14.313	7	4	4	18	2	578	61.9	5.99	0.798698	-0.518664			18.9793						18.8293	18.0918
Sushi domain-containing protein 3 OS=Homo sapiens OX=9606 GN=SUSD3 PE=2 SV=1	SUSD3	Q96L08	14.042	19	3	3	16	3	255	27.1	10.21	0.50858	0.421262	23.6464		23.3393	22.4925	22.6793	24.6867	23.8873	22.7892	22.0886	23.8516
Chloride intracellular channel protein 1 OS=Homo sapiens OX=9606 GN=CLIC1 PE=1 SV=4	CLIC1	O00299	13.939	24	5	5	24	5	241	26.9	5.17	0.876536	-0.0713853	25.3359	24.1526	22.9106	25.2914	25.3865	24.9478	24.1948	24.553	24.2085	24.8161
Tyrosine-protein phosphatase non-receptor type 6 OS=Homo sapiens OX=9606 GN=PTPN6 PE=1 SV=1	PTPN6	P29350	13.843	15	6	6	15	6	595	67.5	7.78	0.64127	-0.312933	24.9906	21.3298	21.3189	24.7688	24.1789	23.9017	22.7775	22.0248	22.4237	23.8947
Keratin, type II cytoskeletal 4 OS=Homo sapiens OX=9606 GN=KRT4 PE=1 SV=4	KRT4	P19013	13.842	8	4	4	12	2	534	57.3	6.61	0.573058	0.493276	20.975		21.1252	22.6183			24.4684		20.5832	21.1467
Basal cell adhesion molecule OS=Homo sapiens OX=9606 GN=BCAM PE=1 SV=2	BCAM	P50895	13.782	11	5	5	14	5	628	67.4	5.81	0.0609055	1.94934	20.1706	19.8483	24.1935	22.6285	22.9021	21.3627	25.2178	24.003	24.0669	24.8394
Ras-related protein Rab-27B OS=Homo sapiens OX=9606 GN=RAB27B PE=1 SV=4	RAB27B	O00194	13.662	20	4	4	61	4	218	24.6	5.52	0.673048	-0.160818	27.1582	26.7003	25.5624	27.0379	27.4086	27.0787	26.9101	25.9563	26.0991	27.0191
Transforming growth factor beta activator LRRC32 OS=Homo sapiens OX=9606 GN=LRRC32 PE=1 SV=1	LRRC32	Q14392	13.662	5	2	2	14	2	662	71.9	6.13	0.825188	0.163413	23.2826	21.1436		23.011	23.0373	24.2723	22.1492	21.0429		23.6638
Lymphocyte antigen 6 complex locus protein G6f OS=Homo sapiens OX=9606 GN=LY6G6F PE=1 SV=2	LY6G6F	Q5SQ64	13.572	21	3	3	20	3	297	32.4	8.56	0.516844	0.509182	24.7441	20.2313	21.3659	23.4876	23.782	24.4789	23.9754	23.6703	20.9163	23.1159
Isoform 2 of V-type proton ATPase 116 kDa subunit a isoform 1 OS=Homo sapiens OX=9606 GN=ATP6V0A1	ATP6V0A1	Q93050-1	13.537	7	5	5	49	5	831	95.7	6.65	0.418611	0.359598	24.6348	24.9907	26.0887	25.4699	25.4822	25.1102	26.0203	24.6551	26.1678	26.5109
Ras-related protein Ral-B OS=Homo sapiens OX=9606 GN=RALB PE=1 SV=1	RALB	P11234	13.507	25	4	4	24	4	206	23.4	6.62	0.126735	-0.562535	24.6124	24.5398	24.0741	24.8737	25.3104	24.3173	24.9485	22.8549	23.9453	24.5315
Protein/nucleic acid deglycase DJ-1 OS=Homo sapiens OX=9606 GN=PARK7 PE=1 SV=2	PARK7	Q99497	13.507	34	4	4	20	4	189	19.9	6.79	0.686276	-0.240187	24.7706	24.1453	20.9997	25.1314	25.0397	23.645	23.5053	23.4765	23.7385	24.5206
Desmoglein-1 OS=Homo sapiens OX=9606 GN=DSG1 PE=1 SV=2	DSG1	Q02413	13.361	6	4	4	5	4	1049	113.7	5.03	0.17071	1.03775	23.1832	24.1382	21.6452	24.78	23.0389	22.5782	25.2393	27.0794	22.9471	24.1302
Claudin-5 OS=Homo sapiens OX=9606 GN=CLDN5 PE=2 SV=1	CLDN5	O00501	13.356	12	2	2	46	2	218	23.1	7.91	0.70204	0.176934	25.9158	24.3652	24.0642	25.6083	25.9416	25.7658	25.4011	24.5649	25.1939	25.8541
Apolipoprotein L1 OS=Homo sapiens OX=9606 GN=APOL1 PE=1 SV=5	APOL1	O14791	13.311	12	4	4	48	4	398	43.9	5.81	0.740293	0.171064	25.1611	25.5274	26.3829	23.8094	23.5235	25.0052	25.6444	24.8398	24.9527	24.8176
Abl interactor 1 OS=Homo sapiens OX=9606 GN=ABI1 PE=1 SV=4	ABI1	Q8IZP0	13.044	7	4	4	25	4	508	55	7.06	0.840697	-0.0878507	25.1568	23.346	24.6341	25.3533	25.7443	25.0218	25.2409	23.903	24.2552	25.3743
Ras-related protein Rab-6A OS=Homo sapiens OX=9606 GN=RAB6A PE=1 SV=3	RAB6A	P20340	12.946	16	4	4	25	1	208	23.6	5.54	0.577205	-0.209953	23.8426	23.1656	22.719	24.085	24.3486	23.7102	23.7862	22.81	23.1025	23.7022
Afamin OS=Homo sapiens OX=9606 GN=AFM PE=1 SV=1	AFM	P43652	12.826	9	4	4	5	4	599	69	5.9	0.189309	1.71707			22.2194	20.6397	17.8272		19.6478	24.9808		21.2088
Complement C1q subcomponent subunit A OS=Homo sapiens OX=9606 GN=C1QA PE=1 SV=2	C1QA	P02745	12.765	14	3	3	14	3	245	26	9.11	0.486013	0.678966	24.3027	24.4447	24.2259	21.8857	26.2869	24.4876	23.8245	25.3307	28.5916	22.3063
Actin-related protein 2/3 complex subunit 5 OS=Homo sapiens OX=9606 GN=ARPC5 PE=1 SV=3	ARPC5	O15511	12.707	23	2	2	15	2	151	16.3	5.67	0.0713501	-0.867806	23.6785			23.8773	23.7704	23.6218	22.9512	22.3666	22.446	23.1523
Equilibrative nucleoside transporter 1 OS=Homo sapiens OX=9606 GN=SLC29A1 PE=1 SV=3	SLC29A1	Q99808	12.645	8	3	3	38	3	456	50.2	8.29	0.235867	0.59433	22.2421	24.1881	23.5864	23.5979	22.7793	23.0792	24.5532	23.3557	24.4858	23.8915
Basigin OS=Homo sapiens OX=9606 GN=BSG PE=1 SV=2	BSG	P35613	12.444	11	3	3	31	3	385	42.2	5.66	0.508796	0.20063	24.9406	24.4281	25.4714	24.7897	25.0055	24.9254	25.213	24.5254	25.5094	25.4651
Brain acid soluble protein 1 OS=Homo sapiens OX=9606 GN=BASP1 PE=1 SV=2	BASP1	P80723	12.406	39	4	4	26	4	227	22.7	4.63	0.567221	0.454185	24.1933	20.7893	25.4573	23.4378	22.9672	23.2704	22.9824	22.6837	25.1921	24.9871
Suprabasin OS=Homo sapiens OX=9606 GN=SBSN PE=1 SV=2	SBSN	Q6UWP8	12.006	15	2	2	4	2	590	60.5	7.01	0.672379	0.365077	19.4013	19.3464	20.4785	19.4752	19.5811	21.1594	18.1346	18.5409	20.8007	21.4723
Caveolae-associated protein 2 OS=Homo sapiens OX=9606 GN=CAVIN2 PE=1 SV=3	CAVIN2	O95810	11.994	9	3	3	40	3	425	47.1	5.21	0.687639	0.276026	24.9524	24.4472	20.8155	25.481	25.9678	24.9675	24.6452	23.5837	25.1903	24.6574
Protein AMBP OS=Homo sapiens OX=9606 GN=AMBP PE=1 SV=1	AMBP	P02760	11.891	13	4	4	25	4	352	39	6.25	0.273577	0.923754	21.8664	23.5769	24.3126	23.7647	21.272	21.8324	24.375	27.4358	21.8265	23.9415
Ras-related protein Rab-21 OS=Homo sapiens OX=9606 GN=RAB21 PE=1 SV=3	RAB21	Q9UL25	11.833	19	3	3	11	3	225	24.3	7.94	0.0149488	1.59915	22.4032	21.5369	23.6937	22.95	22.9295	22.4731	24.4564	26.3455	23.6534	24.5807
Tubulin beta-8 chain OS=Homo sapiens OX=9606 GN=TUBB8 PE=1 SV=2	TUBB8	Q3ZCM7	11.826	12	3	3	12	1	444	49.7	4.89			21.8779			21.818	20.8608					21.4235
Myotrophin OS=Homo sapiens OX=9606 GN=MTPN PE=1 SV=2	MTPN	P58546	11.733	31	2	2	7	2	118	12.9	5.52	0.0795245	-0.809869	24.3704	23.5505		24.898	24.7951	23.7857	23.9104	22.4743	23.5105	24.2872
Serum amyloid A-2 protein OS=Homo sapiens OX=9606 GN=SAA2 PE=1 SV=1	SAA2	P0DJI9	11.495	37	3	3	10	1	122	13.5	9.14	0.423522	1.09218	20.3189		22.4051		22.2321	21.4358			26.1353	20.6614
Synaptosomal-associated protein 23 OS=Homo sapiens OX=9606 GN=SNAP23 PE=1 SV=1	SNAP23	O00161	11.472	21	3	3	32	3	211	23.3	5.01	0.405298	-0.235156	24.7336	24.0863	24.0236	24.5628	24.4509	24.4306	24.3013	23.69	23.6674	24.5922
Myosin regulatory light chain 12B OS=Homo sapiens OX=9606 GN=MYL12B PE=1 SV=2	MYL12B	O14950	11.403	24	3	3	10	3	172	19.8	4.84	0.577296	-0.254187	23.9844	23.7598	22.5868	24.6948	24.7586	24.4118	23.7363	22.8218	23.8768	23.6669
Immunoglobulin heavy variable 3-74 OS=Homo sapiens OX=9606 GN=IGHV3-74 PE=3 SV=1	IGHV3-74	A0A0B4J1X5	11.382	25	3	3	32	1	117	12.8	8.66	0.276119	-1.85369	23.4271	23.636				24.5403	19.6068	22.6927		19.8716
Hemoglobin subunit gamma-1 OS=Homo sapiens OX=9606 GN=HBG1 PE=1 SV=2	HBG1	P69891	11.197	16	2	2	64	1	147	16.1	7.2	0.354925	-1.13322	21.9233		26.126	21.3202	21.6612	19.9396		22.4879		22.4459
Phosphatidylinositol 5-phosphate 4-kinase type-2 alpha OS=Homo sapiens OX=9606 GN=PIP4K2A PE=1 SV=2	PIP4K2A	P48426	11.124	5	2	2	12	2	406	46.2	6.99	0.833221	-0.266171	23.8655	19.6349	22.0033	24.034	24.04	24.0791	23.7801	17.3647	23.4614	23.5615
Platelet glycoprotein Ib alpha chain OS=Homo sapiens OX=9606 GN=GP1BA PE=1 SV=2	GP1BA	P07359	11.045	7	4	4	48	4	652	71.5	6.29	0.758161	0.13588	26.7149	26.0307	24.6639	27.0534	27.4453	26.6498	26.8085	26.0672	26.4413	26.6207
Src kinase-associated phosphoprotein 2 OS=Homo sapiens OX=9606 GN=SKAP2 PE=1 SV=1	SKAP2	O75563	10.976	9	3	3	12	3	359	41.2	4.69	0.85825	-0.169934	25.5753	22.7446	21.8153	25.9542	25.1796	25.0115	25.1786	24.414	20.3972	25.418
CD109 antigen OS=Homo sapiens OX=9606 GN=CD109 PE=1 SV=2	CD109	Q6YHK3	10.761	5	4	4	10	4	1445	161.6	5.85	0.117723	-1.33598	22.8115		22.7957	22.9065	24.7146	22.2261	22.3379		20.0639	23.2565
Inter-alpha-trypsin inhibitor heavy chain H1 OS=Homo sapiens OX=9606 GN=ITIH1 PE=1 SV=3	ITIH1	P19827	10.544	3	2	2	3	2	911	101.3	6.79	0.168334	1.04485		21.3009	21.672	22.1606	21.0746	20.7621	22.1958	25.5574	21.9836	22.4857
SH3 domain-binding glutamic acid-rich-like protein OS=Homo sapiens OX=9606 GN=SH3BGRL PE=1 SV=1	SH3BGRL	O75368	10.465	36	3	3	14	3	114	12.8	5.25	0.489012	-0.357642	24.4645	23.0128	22.1468	24.5944	24.4716	23.7275	23.6187	21.9594	23.4001	24.196
Alpha-soluble NSF attachment protein OS=Homo sapiens OX=9606 GN=NAPA PE=1 SV=3	NAPA	P54920	10.45	13	3	3	10	3	295	33.2	5.36	0.590163	0.28572	23.0932	23.2704	23.6737	24.4505	23.6724	23.902	24.4634	22.518	24.0954	24.6099
Protein unc-13 homolog D OS=Homo sapiens OX=9606 GN=UNC13D PE=1 SV=1	UNC13D	Q70J99	10.366	4	3	3	22	3	1090	123.2	6.65	0.136833	-0.851324	22.5586	24.921	22.5455	23.6295	23.5059	22.6894	23.0199	21.3396	22.4013	23.4537
Endothelial cell-selective adhesion molecule OS=Homo sapiens OX=9606 GN=ESAM PE=1 SV=1	ESAM	Q96AP7	10.353	15	3	3	15	3	390	41.2	9.32	0.331311	0.611863	23.6707	21.1609	22.0073	23.8582	24.0121	24.0578	23.9841	21.9795	23.3633	24.3837
Anoctamin-6 OS=Homo sapiens OX=9606 GN=ANO6 PE=1 SV=2	ANO6	Q4KMQ2	10.196	4	2	2	14	2	910	106.1	7.77	0.866607	-0.0889588	22.3636			21.9324	22.244	22.7103	21.6019			21.9611
Secretory carrier-associated membrane protein 2 OS=Homo sapiens OX=9606 GN=SCAMP2 PE=1 SV=2	SCAMP2	O15127	10.196	6	1	1	6	1	329	36.6	6.1	0.41958	0.504789	22.3199		20.0193	21.9797	22.2628	23.1483	22.2155	20.976		22.2611
Ras-related protein Rab-11A OS=Homo sapiens OX=9606 GN=RAB11A PE=1 SV=3	RAB11A	P62491	10.148	15	3	3	29	3	216	24.4	6.57	0.877278	0.0452745	26.0109	25.2404	25.6235	26.2431	26.3359	25.7792	26.1376	25.6991	25.7103	26.3541
Heparanase OS=Homo sapiens OX=9606 GN=HPSE PE=1 SV=2	HPSE	Q9Y251	10.066	7	4	4	28	4	543	61.1	9.28	0.241578	0.702909	24.5689	23.2758	21.5278	24.1307	23.3249	24.1552	24.4497	23.2172	25.1887	23.3318
Heat shock protein HSP 90-beta OS=Homo sapiens OX=9606 GN=HSP90AB1 PE=1 SV=4	HSP90AB1	P08238	10.044	8	4	4	13	1	724	83.2	5.03	0.847911	-0.0924774	21.1481			21.7241	20.9572	20.9609			21.0554	21.5356
Intercellular adhesion molecule 2 OS=Homo sapiens OX=9606 GN=ICAM2 PE=1 SV=2	ICAM2	P13598	9.84	15	3	3	26	3	275	30.6	7.43	0.715068	-0.148357	24.8806	24.1619	23.6044	24.8682	25.0177	25.0499	24.6662	23.4179	23.9106	24.7466
Ras-related protein Rap-2b OS=Homo sapiens OX=9606 GN=RAP2B PE=1 SV=1	RAP2B	P61225	9.792	14	3	3	21	3	183	20.5	4.81	0.295882	-0.39546	24.2616	23.4111	23.3454	24.267	24.0886	23.739	24.1806	22.7207	22.653	24.1031
55 kDa erythrocyte membrane protein OS=Homo sapiens OX=9606 GN=MPP1 PE=1 SV=2	MPP1	Q00013	9.763	8	3	3	22	3	466	52.3	7.37	0.305964	-0.5363	23.3014	23.842	22.2721	24.5398	23.7447	23.1299	23.1448	21.8809	22.586	24.2768
Alpha-synuclein OS=Homo sapiens OX=9606 GN=SNCA PE=1 SV=1	SNCA	P37840	9.761	26	2	2	13	2	140	14.5	4.7	0.697488	-0.213947	21.7834	22.6545	24.0441	22.9434	22.1882	21.2801	23.8318	21.408	22.5565	23.4675
SH3 domain-binding glutamic acid-rich-like protein 3 OS=Homo sapiens OX=9606 GN=SH3BGRL3 PE=1 SV=1	SH3BGRL3	Q9H299	9.695	67	3	3	26	3	93	10.4	4.93	0.765506	0.161472	26.4039	23.0366	24.6576	25.8778	26.7313	25.6004	26.0056	24.6469	25.3516	25.9101
Immunoglobulin heavy variable 1-8 OS=Homo sapiens OX=9606 GN=IGHV1-8 PE=3 SV=1	IGHV1-8	P0DP01	9.579	22	2	2	7	2	117	13	9.17	0.0355614	-2.34789	26.5859	23.8808	23.7636	21.6371	21.7908	19.8355	23.1538	23.6083	20.1155	19.2057
Immunoglobulin kappa variable 2-40 OS=Homo sapiens OX=9606 GN=IGKV2-40 PE=3 SV=2	IGKV2-40	A0A087WW87	9.572	17	2	2	19	1	121	13.3	4.61	0.365022	-0.929502	21.9276	24.6679	26.4096	20.9687	22.9419	21.8936	21.6206	25.4816		20.8188
Myosin regulatory light polypeptide 9 OS=Homo sapiens OX=9606 GN=MYL9 PE=1 SV=4	MYL9	P24844	9.54	17	2	2	6	2	172	19.8	4.92	0.106611	-1.13051	21.8524	21.2456		23.6565	23.7938	22.63	21.5155	21.0711		20.8097
GTPase KRas OS=Homo sapiens OX=9606 GN=KRAS PE=1 SV=1	KRAS	P01116	9.505	34	4	4	30	4	189	21.6	6.77	0.159245	-0.548695	24.6473	24.3532	24.29	24.8019	24.779	24.1335	24.6337	22.4173	24.2195	24.7241
Serum amyloid A-4 protein OS=Homo sapiens OX=9606 GN=SAA4 PE=1 SV=2	SAA4	P35542	9.467	19	2	2	31	2	130	14.7	9.07	0.818519	0.1446	25.0366	24.1991	26.8261	24.9161	26.2769	24.2709	25.3802	25.4702	26.4855	26.3711
Fibrinogen alpha chain OS=Homo sapiens OX=9606 GN=FGA PE=1 SV=2	FGA	P02671	9.441	5	4	4	19	4	866	94.9	6.01	0.0144832	1.48042	24.1615	20.7969	22.1012	23.2058	24.0892	24.6605	23.8949	24.5744	24.452	24.175
Alpha-1-acid glycoprotein 1 OS=Homo sapiens OX=9606 GN=ORM1 PE=1 SV=1	HEL-S-153w	P02763	9.353	7	1	1	3	1	201	23.5	5.02	0.0774758	1.89129			20.4563	20.5117			20.8009	23.9497
Collectin-11 OS=Homo sapiens OX=9606 GN=COLEC11 PE=1 SV=1	COLEC11	Q9BWP8	9.259	8	3	3	6	3	271	28.6	5.41	0.477297	0.620132	24.2069	19.3954	20.6913	21.9093	21.6705	22.7007	20.2367	23.4374	22.1062	22.4931
Integrin alpha-L OS=Homo sapiens OX=9606 GN=ITGAL PE=1 SV=3	ITGAL	P20701	9.249	4	3	3	11	3	1170	128.7	5.63	0.172478	-0.504095	23.6052	22.8284	23.5945	23.4618	23.3608	23.0238	23.3154	21.6824	22.9068	23.4018
Arachidonate 12-lipoxygenase, 12S-type OS=Homo sapiens OX=9606 GN=ALOX12 PE=1 SV=4	ALOX12	P18054	9.221	5	2	2	8	2	663	75.6	6.21	0.841738	0.15357	23.8027	22.6383	19.7371	23.1108	23.6478	23.4276	23.7303	20.9832		22.8224
CD226 antigen OS=Homo sapiens OX=9606 GN=CD226 PE=1 SV=2	CD226	Q15762	9.185	11	2	2	13	2	336	38.6	7.94	0.740089	-0.348617	24.1342	23.4303		23.2525	23.0269	23.8767	23.5183	21.93	23.9657	22.2713
Beta-arrestin-1 OS=Homo sapiens OX=9606 GN=ARRB1 PE=1 SV=2	ARRB1	P49407	9.147	13	3	3	16	3	418	47	6.2	0.296025	0.728677	23.6029	21.9324	19.3517	23.7412	23.3361	23.8313	23.4446		22.1683	23.042
Ficolin-1 OS=Homo sapiens OX=9606 GN=FCN1 PE=1 SV=2	FCN1	O00602	8.936	12	2	2	4	2	326	35.1	6.86	0.905933	0.0794366	22.8031	20.0781	21.2047	22.3951	20.6026	23.4146	20.4653	21.1519	21.2604	21.1885
Neutral amino acid transporter B(0) OS=Homo sapiens OX=9606 GN=SLC1A5 PE=1 SV=2	SLC1A5	Q15758	8.928	6	2	2	24	2	541	56.6	5.48	0.739031	0.309928	21.3679	24.1127	25.7416	23.6907	22.0692	21.842	23.7724	23.724	24.2944	24.8988
Immunoglobulin kappa variable 3-15 OS=Homo sapiens OX=9606 GN=IGKV3-15 PE=1 SV=2	IGKV3-15	P01624	8.84	26	2	2	6	2	115	12.5	5.19	0.208527	1.19844	23.1012	25.0204	22.8188	21.8715	22.4014	23.3948	23.7719	26.8997		22.898
High affinity cationic amino acid transporter 1 OS=Homo sapiens OX=9606 GN=SLC7A1 PE=1 SV=1	SLC7A1	P30825	8.739	6	3	3	20	3	629	67.6	5.43	0.0769367	0.875523	22.4924	23.2266	23.4645	23.0674	21.6934	23.0647	24.3015	23.4813	24.1643	23.3103
Platelet glycoprotein VI OS=Homo sapiens OX=9606 GN=GP6 PE=1 SV=4	GP6	Q9HCN6	8.469	5	1	1	8	1	339	36.8	9.2	0.866379	-0.15118		24.0944	22.4		25.5601	24.6204			23.1136
Platelet-derived growth factor C OS=Homo sapiens OX=9606 GN=PDGFC PE=1 SV=2	PDGFC	Q9NRA1	8.442	11	2	2	19	2	345	39	6.14	0.714545	0.155273	24.4908	22.4682	25.0522	23.6583	24.2522	24.2569	23.055	24.271	24.4292	24.686
Leukocyte surface antigen CD47 OS=Homo sapiens OX=9606 GN=CD47 PE=1 SV=1	CD47	Q08722	8.408	9	3	3	54	3	323	35.2	7.21	0.666265	-0.13496	27.5325	27.285	28.4908	27.4729	27.7664	27.2296	27.6999	27.0854	27.645	28.2129
Src substrate cortactin OS=Homo sapiens OX=9606 GN=CTTN PE=1 SV=2	CTTN	Q14247	8.402	6	3	3	14	3	550	61.5	5.4	0.923914	0.0550459	24.7105	22.7348	23.2767	25.2835	24.7378	24.3582	24.1626			24.0904
Integrin alpha-5 OS=Homo sapiens OX=9606 GN=ITGA5 PE=1 SV=2	ITGA5	P08648	8.4	4	2	2	10	2	1049	114.5	5.77	0.840936	-0.138745	23.5671			23.0162	23.3756	23.485	23.6932			22.3645
Dermcidin OS=Homo sapiens OX=9606 GN=DCD PE=1 SV=2	DCD	P81605	8.385	23	3	3	6	3	110	11.3	6.54	0.0875759	1.24494	23.4812	19.917	22.3374	22.7757	22.3902	22.2378	23.3171	22.6787	23.866	25.0265
Nck-associated protein 1 OS=Homo sapiens OX=9606 GN=NCKAP1 PE=1 SV=1	NCKAP1	Q9Y2A7	8.358	4	3	3	12	3	1128	128.7	6.62	0.270179	1.03449	24.0806	19.4261	19.5882	24.007	24.1083	24.3008	24.4671	22.14	22.4389	23.0359
6-phosphogluconate dehydrogenase, decarboxylating OS=Homo sapiens OX=9606 GN=PGD PE=1 SV=3	PGD	P52209	8.356	17	4	4	14	4	483	53.1	7.23	0.0684897	-2.04248	23.5255	20.9663		23.6593	23.5529	21.3938	22.4706	17.4489	19.9686	23.1357
SH3 domain-binding glutamic acid-rich-like protein 2 OS=Homo sapiens OX=9606 GN=SH3BGRL2 PE=1 SV=2	SH3BGRL2	Q9UJC5	8.351	25	2	2	13	2	107	12.3	6.71	0.0156633	-1.93117	23.9744	23.0541		24.2845	23.6455	22.8326	23.5785	21.0359	20.1739	21.4213
Rho GDP-dissociation inhibitor 1 OS=Homo sapiens OX=9606 GN=ARHGDIA PE=1 SV=3	ARHGDIA	P52565	8.315	16	2	2	24	2	204	23.2	5.11	0.0330571	-1.30105	24.2651	22.9479	22.875	24.2809	24.2088	20.4949	23.5835	21.1122	22.7351	24.1467
Guanine nucleotide-binding protein subunit alpha-13 OS=Homo sapiens OX=9606 GN=GNA13 PE=1 SV=2	GNA13	Q14344	8.232	12	3	3	36	2	377	44	8	0.94532	-0.0303667	22.7091	20.2971	21.6293	22.4588	22.4563	22.4538	22.063	20.9404	22.2076	21.7341
Immunoglobulin kappa variable 2-29 OS=Homo sapiens OX=9606 GN=IGKV2-29 PE=3 SV=2	IGKV2-29	A2NJV5	8.153	17	2	2	14	1	120	13.1	7.28	0.367606	-1.65867		24.9358			19.391	19.0123		23.0826		19.4193
Keratinocyte proline-rich protein OS=Homo sapiens OX=9606 GN=KPRP PE=1 SV=1	KPRP	Q5T749	8.116	4	2	2	5	2	579	64.1	8.27	0.304385	-2.78156		20.4242					18.13		17.3316	17.4664
Vesicle-associated membrane protein 7 OS=Homo sapiens OX=9606 GN=VAMP7 PE=1 SV=3	VAMP7	P51809	8.083	15	2	2	12	2	220	24.9	8.6	0.684044	-0.264824	23.3286	21.3413		23.0679	22.8235	23.6563	23.4428	20.6824	21.4682	22.6279
Sarcoplasmic/endoplasmic reticulum calcium ATPase 3 OS=Homo sapiens OX=9606 GN=ATP2A3 PE=1 SV=2	ATP2A3	Q93084	8.067	5	3	3	6	3	1043	113.9	5.57	0.290579	-0.655297	23.515	21.5313		23.6745	23.6291	23.2716	23.154	20.7739	21.6497	23.3117
Tissue factor pathway inhibitor OS=Homo sapiens OX=9606 GN=TFPI PE=1 SV=1	TFPI	P10646	8.047	17	4	4	9	4	304	35	8.25	0.868042	-0.118643	23.4505	21.8634	21.5036	22.8051	23.6825	22.1457	22.7971	23.3461	20.2205	24.2025
Dual specificity protein phosphatase 3 OS=Homo sapiens OX=9606 GN=DUSP3 PE=1 SV=1	DUSP3	P51452	8.041	22	3	3	9	3	185	20.5	7.8	0.307987	1.23423	22.7848	21.5661		23.0065	23.1419	29.0633	22.5102	21.9776		21.8851
Sushi domain-containing protein 1 OS=Homo sapiens OX=9606 GN=SUSD1 PE=1 SV=1	SUSD1	Q6UWL2	7.934	3	2	2	16	2	747	82.7	6.43	0.555107	0.317071	22.7581		21.1813	23.1901	24.244	23.5141	23.5813	22.5505	22.8675	23.289
Immunoglobulin kappa variable 3D-11 OS=Homo sapiens OX=9606 GN=IGKV3D-11 PE=3 SV=6	IGKV3D-11	A0A0A0MRZ8	7.894	26	2	2	20	2	115	12.6	5.29	0.475041	0.478955	23.1907	24.1933	22.2952	22.5907	21.4122	21.9858	22.8026	25.1088	23.7476	22.432
Microtubule-associated protein RP/EB family member 1 OS=Homo sapiens OX=9606 GN=MAPRE1 PE=1 SV=3	MAPRE1	Q15691	7.798	11	2	2	10	2	268	30	5.14	0.138736	-0.760113	23.3758	22.4693	23.6719	23.1373	23.2877	23.1674	22.4518	20.3979	22.6123	23.512
Heparin cofactor 2 OS=Homo sapiens OX=9606 GN=SERPIND1 PE=1 SV=3	SERPIND1	P05546	7.749	6	3	3	12	3	499	57	6.9	0.114994	1.13414	21.2626	22.6748	22.9384	22.5889	20.0093	21.0564	23.7177	24.8476	22.9845	22.5385
Keratin, type II cytoskeletal 7 OS=Homo sapiens OX=9606 GN=KRT7 PE=1 SV=5	KRT7	P08729	7.741	5	2	2	7	1	469	51.4	5.48
Transaldolase OS=Homo sapiens OX=9606 GN=TALDO1 PE=1 SV=2	TALDO1	P37837	7.71	7	2	2	8	2	337	37.5	6.81	0.0153332	-1.01262	23.6872	24.1151		24.5095	24.1418	23.3822	23.4283	22.4248	22.4015	23.8672
Leukocyte elastase inhibitor OS=Homo sapiens OX=9606 GN=SERPINB1 PE=1 SV=1	SERPINB1	P30740	7.601	10	3	3	15	3	379	42.7	6.28	0.139497	-0.73411	23.9906	22.685	23.0289	24.6019	24.4231	23.1367	23.2192	21.4435	23.3808	23.8787
Pleckstrin homology domain-containing family B member 2 OS=Homo sapiens OX=9606 GN=PLEKHB2 PE=1 SV=1	PLEKHB2	Q96CS7	7.512	10	2	2	11	2	222	24.7	5.39	0.5111	0.457563	23.4939	20.3903	23.8856	21.9729	22.7687	23.3172	22.3044	22.4271	22.2909	24.4596
Immunoglobulin heavy variable 3-43D OS=Homo sapiens OX=9606 GN=IGHV3-43D PE=3 SV=1	IGHV3-43D	P0DP04	7.496	19	2	2	11	2	118	13	5.41	0.132157	1.83791	22.118	22.3904	21.026	21.7341	21.9383	27.2823	22.9138	23.2449		21.2761
Crk-like protein OS=Homo sapiens OX=9606 GN=CRKL PE=1 SV=1	CRKL	P46109	7.493	14	3	3	10	3	303	33.8	6.74	0.00211942	-2.38866	24.1591	23.5405	24.681	24.378	23.8061	22.2734	21.7188	19.5758	21.2138	23.8397
Phospholipid transfer protein OS=Homo sapiens OX=9606 GN=PLTP PE=1 SV=1	PLTP	P55058	7.438	5	2	2	17	2	493	54.7	7.01	0.812877	0.0958065	23.7565	23.4438	23.4628	22.5133	21.9863	23.6916	22.7529	22.1086	23.6185	23.4702
Golgi-associated plant pathogenesis-related protein 1 OS=Homo sapiens OX=9606 GN=GLIPR2 PE=1 SV=3	GLIPR2	Q9H4G4	7.405	17	2	2	5	2	154	17.2	9.41	0.905478	0.0496727	24.4169	23.7741	25.4144	23.8174	23.6623	23.7246	23.8561	23.8102	25.0092	24.9334
Wiskott-Aldrich syndrome protein family member 2 OS=Homo sapiens OX=9606 GN=WASF2 PE=1 SV=3	WASF2	Q9Y6W5	7.366	6	2	2	19	2	498	54.3	5.53	0.34858	-0.31903	23.9343	23.4033	23.8986	23.804	24.0861	23.4222	23.8753	22.4117	23.9332	23.8888
Cathelicidin antimicrobial peptide OS=Homo sapiens OX=9606 GN=CAMP PE=1 SV=1	CAMP	P49913	7.263	12	2	2	18	2	170	19.3	9.41	0.453033	0.349444	24.3218	22.6763	25.3362	24.0916	23.4895	24.1939	23.8461	24.0722	24.7197	24.8305
Galectin-related protein OS=Homo sapiens OX=9606 GN=LGALSL PE=1 SV=2	LGALSL	Q3ZCW2	7.217	28	3	3	21	3	172	19	5.35	0.654861	-0.263609	24.1971	23.3118	20.7989	24.5537	24.0504	22.8227	23.3522	22.7689	22.2856	24.3645
Antithrombin-III OS=Homo sapiens OX=9606 GN=SERPINC1 PE=1 SV=1	SERPINC1	P01008	7.171	11	3	3	14	3	464	52.6	6.71	0.132481	1.01945	21.2235	22.2753	22.7067	21.6744	20.6449	21.6618	20.6362	25.6295	23.3352	22.3594
Coronin-1B OS=Homo sapiens OX=9606 GN=CORO1B PE=1 SV=1	CORO1B	Q9BR76	7.162	10	3	3	4	3	489	54.2	5.88	0.0343714	-1.66388	22.33			22.5218	22.3339	22.0549	19.816			20.323
Dihydropyrimidinase-related protein 2 OS=Homo sapiens OX=9606 GN=DPYSL2 PE=1 SV=1	DPYSL2	Q16555	7.098	8	2	2	8	2	572	62.3	6.38	0.10436	-1.6271	24.2471			23.8814	23.1555	22.524	22.5303	20.0434		23.439
Toll-interacting protein OS=Homo sapiens OX=9606 GN=TOLLIP PE=1 SV=1	TOLLIP	Q9H0E2	7.038	12	2	2	2	2	274	30.3	5.97	0.56626	-0.313242	21.9486			21.7587	22.0045	22.4324	21.9181	20.383	21.5047	21.7155
Lipopolysaccharide-binding protein OS=Homo sapiens OX=9606 GN=LBP PE=1 SV=3	LBP	P18428	6.97	5	2	2	3	2	481	53.4	6.7	0.010723	2.10053	18.8856	20.497		21.3429	20.8667		23.147	21.1614	23.1873
Septin-2 OS=Homo sapiens OX=9606 GN=SEPTIN2 PE=1 SV=1	SEPTIN2	Q15019	6.929	12	3	3	7	3	361	41.5	6.6	0.607166	-0.364333	24.2547	22.5673	20.0222	24.0427	23.6105	22.1237	23.3449	20.9083	22.8631	23.4358
Bridging integrator 2 OS=Homo sapiens OX=9606 GN=BIN2 PE=1 SV=3	BIN2	Q9UBW5	6.917	5	2	2	7	2	565	61.8	5.15	0.68107	-0.346437	21.9635	18.6132		23.4094	23.2835	21.9354	21.6694	19.1841	22.3468	22.2191
Immunoglobulin lambda variable 1-47 OS=Homo sapiens OX=9606 GN=IGLV1-47 PE=1 SV=2	IGLV1-47	P01700	6.878	11	1	1	40	1	117	12.3	5.91	0.88615	0.202598	28.9289	30.2947	27.0829	26.9924	24.9384	29.5915	29.7031	30.0671	25.3495	24.539
Short transient receptor potential channel 6 OS=Homo sapiens OX=9606 GN=TRPC6 PE=1 SV=1	TRPC6	Q9Y210	6.773	4	2	2	7	2	931	106.3	6.67	0.98041	0.0110347	22.7309	21.0715	20.422	22.7457	22.5421	22.0775	22.2147	21.6738	21.0522	22.5492
Actin-related protein 2/3 complex subunit 3 OS=Homo sapiens OX=9606 GN=ARPC3 PE=1 SV=3	ARPC3	O15145	6.658	9	2	2	10	2	178	20.5	8.59	0.660893	0.341438	23.8157	22.6615	19.0505	24.0635	24.0399	23.5699	23.6917	22.689	22.1449	23.2427
Erythroid membrane-associated protein OS=Homo sapiens OX=9606 GN=ERMAP PE=1 SV=1	ERMAP	Q96PL5	6.65	5	2	2	7	2	475	52.6	8.47	0.183936	1.15353	19.8709	21.1745	22.7277	21.8078	20.5428	19.8602	22.7974		23.3356	23.5198
Angiogenin OS=Homo sapiens OX=9606 GN=ANG PE=1 SV=1	ANG	P03950	6.584	20	2	2	5	2	147	16.5	9.64	0.932641	-0.0440848	23.3746	23.1712	23.8297	22.9052	21.0036	22.7268	22.9462	22.402	21.9455	24.0435
Growth factor receptor-bound protein 2 OS=Homo sapiens OX=9606 GN=GRB2 PE=1 SV=1	GRB2	P62993	6.528	12	3	3	17	3	217	25.2	6.32	0.511543	-0.252725	24.8636	23.8338	23.1921	24.7974	24.8391	24.3078	23.8247	23.7832	23.6963	24.6504
Vesicle-associated membrane protein 3 OS=Homo sapiens OX=9606 GN=VAMP3 PE=1 SV=3	VAMP3	Q15836	6.484	24	1	1	14	1	100	11.3	8.79	0.100607	0.632339	26.3342	25.7785	24.9847	25.6496	25.8618	26.4577	25.6871	25.8744	26.9883	26.763
Guanine nucleotide-binding protein G(s) subunit alpha isoforms XLas OS=Homo sapiens OX=9606 GN=GNAS PE=1 SV=2	GNAS	Q5JWF2	6.464	3	2	2	17	1	1037	111	5.03	0.73029	-0.145878	21.3591	20.9339	23.1173	21.4218	21.4989	21.1421	21.4945	20.564	21.9286	22.4724
Elongation factor 1-alpha 2 OS=Homo sapiens OX=9606 GN=EEF1A2 PE=1 SV=1	EEF1A2	Q05639	6.32	6	2	2	10	2	463	50.4	9.03	0.43872	-0.361765	23.0064	22.838	23.1209	22.9355	22.8098	21.2007	23.2564	21.6507	23.4576	23.3362
Desmoplakin OS=Homo sapiens OX=9606 GN=DSP PE=1 SV=3	DSP	P15924	6.306	1	3	3	7	3	2871	331.6	6.81	0.0613465	2.13237	19.6874		19.3718	20.1791	19.7184		22.2178			21.5252
Retinol-binding protein 4 OS=Homo sapiens OX=9606 GN=RBP4 PE=1 SV=3	RBP4	P02753	6.299	14	2	2	2	2	201	23	6.07	0.149805	2.36596				21.6135				23.9795
Beta-adducin OS=Homo sapiens OX=9606 GN=ADD2 PE=1 SV=3	ADD2	P35612	6.297	4	2	2	3	2	726	80.8	5.92	0.354776	1.06831		20.4299	20.9962	21.8817	18.9945		21.5757			21.7121
Transforming growth factor beta-1 proprotein OS=Homo sapiens OX=9606 GN=TGFB1 PE=1 SV=2	TGFB1	P01137	6.267	12	2	2	7	2	390	44.3	8.53	0.186066	0.647886	22.4531	21.0269	22.0637	22.0308	22.2817	23.841	22.1417	21.417	22.6972	22.9987
Low affinity immunoglobulin gamma Fc region receptor III-A OS=Homo sapiens OX=9606 GN=FCGR3A PE=1 SV=2	FCGR3A	P08637	6.052	9	2	2	9	2	254	29.1	8.07	0.755808	0.222074	23.4809		22.1944	22.2955	22.1348	22.0309	23.0771		23.2043	22.6814
Receptor-type tyrosine-protein phosphatase alpha OS=Homo sapiens OX=9606 GN=PTPRA PE=1 SV=3	PTPRA	P18433	5.798	3	2	2	14	2	802	90.7	6.65	0.562342	-0.29944	24.2004	22.5607	21.9034	23.5839	23.1299	23.0946	23.313	21.962	22.116	23.3956
LHFPL tetraspan subfamily member 2 protein OS=Homo sapiens OX=9606 GN=LHFPL2 PE=2 SV=2	LHFPL2	Q6ZUX7	5.678	16	2	2	6	2	228	24.5	6.49	0.182069	-0.80579	22.6189	23.6267	20.7775	22.81	22.9964	22.5475	22.2828	21.2188	20.9954	21.7561
Solute carrier family 43 member 3 OS=Homo sapiens OX=9606 GN=SLC43A3 PE=1 SV=2	SLC43A3	Q8NBI5	5.665	3	1	1	23	1	491	54.5	8.53	0.78753	-0.102533	23.8183	23.5866	24.8962	23.9426	24.165	23.7534	24.0638	22.9697	24.4019	24.7072
Immunoglobulin heavy variable 4-34 OS=Homo sapiens OX=9606 GN=IGHV4-34 PE=1 SV=2	IGHV4-34	P06331	5.664	13	1	1	1	1	123	13.8	9.33										24.0773
Isoform 4 of Caldesmon OS=Homo sapiens OX=9606 GN=CALD1	CALD1	Q05682-4	5.62	5	2	2	5	2	538	62.6	6.37	0.0635746	-1.18536	21.2111	18.8578		22.1023	22.6741	21.1252	19.2345	19.5561	19.5998	20.6144
Glucose-6-phosphate isomerase OS=Homo sapiens OX=9606 GN=GPI PE=1 SV=4	GPI	P06744	5.584	7	3	3	8	3	558	63.1	8.32	0.48923	-0.272298	22.5684	20.7075	21.7102	22.5086	22.607	22.1382	21.0955	21.221	22.0618	22.2236
F-actin-capping protein subunit alpha-2 OS=Homo sapiens OX=9606 GN=CAPZA2 PE=1 SV=3	CAPZA2	P47755	5.539	8	2	2	13	2	286	32.9	5.85	0.833191	-0.0839068	24.0356	23.4175	22.0838	23.9723	23.8723	23.777	23.604	22.769	23.1095	23.7026
Plasma kallikrein OS=Homo sapiens OX=9606 GN=KLKB1 PE=1 SV=1	KLKB1	P03952	5.498	4	2	2	3	2	638	71.3	8.22	0.879023	0.157546	22.9178	22.4239		21.7103	23.6411	21.5304	22.3302	24.632
Protein eva-1 homolog B OS=Homo sapiens OX=9606 GN=EVA1B PE=1 SV=1	EVA1B	Q9NVM1	5.425	32	2	2	4	2	165	18.4	4.73	0.78627	0.171275	23.1767		21.8953	21.8011	21.4508	23.5653	21.3696	22.0596	20.6616	23.6051
Trem-like transcript 1 protein OS=Homo sapiens OX=9606 GN=TREML1 PE=1 SV=2	TREML1	Q86YW5	5.33	12	2	2	6	2	311	32.7	6.05	0.0753557	1.08276	22.6172	21.9825	21.8131	21.9782	22.9909	23.232	23.0769			23.7685
Transketolase OS=Homo sapiens OX=9606 GN=TKT PE=1 SV=3	TKT	P29401	5.319	4	1	1	5	1	623	67.8	7.66	0.966824	-0.0334398	21.9744	20.4578		22.1243	22.4661	20.9681				22.4763
Thymidine phosphorylase OS=Homo sapiens OX=9606 GN=TYMP PE=1 SV=2	TYMP	P19971	5.261	7	2	2	2	2	482	49.9	5.53	0.847652	-0.154064	20.1717	20.2649	21.4747	22.9554	20.7389	19.524	22.6878		20.0501	21.6063
Cytochrome b-245 heavy chain OS=Homo sapiens OX=9606 GN=CYBB PE=1 SV=2	CYBB	P04839	5.214	5	2	2	5	2	570	65.3	8.63	0.68427	0.201899	22.5438	21.869	21.3403	22.0014	20.3575	21.8784	20.9096	21.2614	22.6217	22.4505
Immunoglobulin kappa variable 1-27 OS=Homo sapiens OX=9606 GN=IGKV1-27 PE=3 SV=1	IGKV1-27	A0A075B6S5	5.158	14	1	1	9	1	117	12.7	8.29	0.514558	-0.582885	19.6643	20.7203	22.2737		22.7439	22.834	19.7434	22.2909	19.8154	19.1545
Synaptic vesicular amine transporter OS=Homo sapiens OX=9606 GN=SLC18A2 PE=1 SV=2	SLC18A2	Q05940	5.024	3	1	1	2	1	514	55.7	6.04	0.258165	0.920229	19.4861		17.7754	20.7244	20.7199	22.2134	20.6677	20.2672	19.8964	19.9386
Septin-6 OS=Homo sapiens OX=9606 GN=SEPTIN6 PE=1 SV=4	SEPTIN6	Q14141	4.996	11	3	3	8	2	434	49.7	6.67	0.616965	-0.403601	23.5513	22.6203	19.1599	23.8361	23.8373	22.5333	22.378	21.7374	20.9038	23.4345
Protein S100-A8 OS=Homo sapiens OX=9606 GN=S100A8 PE=1 SV=1	S100A8	P05109	4.962	12	1	1	25	1	93	10.8	7.03	0.850163	-0.100088	25.486	24.5766	26.4573	24.6569	24.836	24.1976	25.2852	24.1118	26.3264	25.5914
H(+)/Cl(-) exchange transporter 3 OS=Homo sapiens OX=9606 GN=CLCN3 PE=1 SV=2	CLCN3	P51790	4.817	2	2	2	4	2	818	90.9	6.28	0.781832	0.308871		21.8307	18.9756	18.1726	21.7675	19.0715	19.0396	19.1523	21.8396	23.3743
Desmocollin-1 OS=Homo sapiens OX=9606 GN=DSC1 PE=1 SV=2	DSC1	Q08554	4.813	3	2	2	4	2	894	99.9	5.43									19.6117
C4b-binding protein beta chain OS=Homo sapiens OX=9606 GN=C4BPB PE=1 SV=1	C4BPB	P20851	4.796	10	2	2	7	2	252	28.3	5.14	0.83291	0.11389	22.3429	22.1958	21.5387	20.4301	20.9009	21.5687	21.9058	21.5387		21.3692
Beta-parvin OS=Homo sapiens OX=9606 GN=PARVB PE=1 SV=1	PARVB	Q9HBI1	4.752	4	1	1	5	1	364	41.7	6.73	0.695392	-0.208849	23.5937	22.5131	20.6914	23.5665	23.3253	22.7468	22.8011	22.3067	21.5717	23.2194
Flavin reductase (NADPH) OS=Homo sapiens OX=9606 GN=BLVRB PE=1 SV=3	BLVRB	P30043	4.752	5	1	1	2	1	206	22.1	7.65	0.226272	0.857124	19.1341	20.7487	21.8516	20.5972	20.2533	20.262	21.4034		21.3433	22.4877
Septin-11 OS=Homo sapiens OX=9606 GN=SEPTIN11 PE=1 SV=3	SEPTIN11	Q9NVA2	4.742	7	2	2	7	1	429	49.4	6.81			20.5373			20.2837	19.7358					19.3271
Cytoplasmic protein NCK2 OS=Homo sapiens OX=9606 GN=NCK2 PE=1 SV=2	NCK2	O43639	4.697	3	1	1	6	1	380	42.9	6.95	0.200785	-0.617858	21.9398		20.3451	22.3216	22.042	21.4771	21.5464	20.2439	20.231	21.723
Small integral membrane protein 1 OS=Homo sapiens OX=9606 GN=SMIM1 PE=1 SV=1	SMIM1	B2RUZ4	4.687	21	1	1	17	1	78	8.7	9.03	0.206143	0.544463	22.0827	22.2381	24.2405	22.3034	22.7222	23.3497	23.1702	22.2543	23.6184	23.9167
BRO1 domain-containing protein BROX OS=Homo sapiens OX=9606 GN=BROX PE=1 SV=1	BROX	Q5VW32	4.67	5	1	1	1	1	411	46.4	7.65	0.646677	0.473119	21.0296			21.4819			21.4046			22.0531
Glutathione S-transferase omega-1 OS=Homo sapiens OX=9606 GN=GSTO1 PE=1 SV=2	GSTO1	P78417	4.649	19	2	2	4	2	241	27.5	6.6	0.58065	-0.253207	23.8603	22.9278	21.2225	23.3513	24.2228	23.2692	23.396	22.5493	22.0927	23.0115
Tetraspanin-4 OS=Homo sapiens OX=9606 GN=TSPAN4 PE=1 SV=1	TSPAN4	O14817	4.613	11	1	1	4	1	238	26.1	6.47	0.164726	0.949849	22.3786			20.9917	21.0504	22.7472	22.0997
Monoglyceride lipase OS=Homo sapiens OX=9606 GN=MGLL PE=1 SV=2	MGLL	Q99685	4.535	15	2	2	7	2	303	33.2	6.99	0.147588	-1.26501	22.8993			23.3673	22.9509	22.6441	21.949			20.8294
Fibrocystin-L OS=Homo sapiens OX=9606 GN=PKHD1L1 PE=2 SV=2	PKHD1L1	Q86WI1	4.508	1	2	2	4	2	4243	465.4	6.11	0.591671	-0.340006	23.4495			22.6229	22.9014	22.5074	22.8254			22.621
Filaggrin-2 OS=Homo sapiens OX=9606 GN=FLG2 PE=1 SV=1	FLG2	Q5D862	4.449	1	2	2	2	2	2391	247.9	8.31	0.878702	-0.147271	20.3352					20.6245	19.7514
Peroxiredoxin-1 OS=Homo sapiens OX=9606 GN=PRDX1 PE=1 SV=1	PRDX1	Q06830	4.444	11	2	2	17	1	199	22.1	8.13	0.238896	-0.462545	22.2714		22.4564	23.0104	22.8554	21.8081	22.7493	21.1986	22.3239	22.8493
Unconventional myosin-Ig OS=Homo sapiens OX=9606 GN=MYO1G PE=1 SV=2	MYO1G	B0I1T2	4.412	3	2	2	12	2	1018	116.4	8.73	0.827088	-0.091786	22.538		23.2553	22.1189	22.2676	21.8115	22.4659		22.8382	22.6971
Disheveled-associated activator of morphogenesis 1 OS=Homo sapiens OX=9606 GN=DAAM1 PE=1 SV=2	DAAM1	Q9Y4D1	4.283	2	2	2	6	2	1078	123.4	7.23	0.0778299	-0.582569	23.0964	22.5092	22.5767	23.6745	23.3761	22.3255	22.6081	22.9729	21.9992	22.4144
Apolipoprotein A-V OS=Homo sapiens OX=9606 GN=APOA5 PE=1 SV=1	APOA5	Q6Q788	4.275	6	2	2	3	2	366	41.2	6.43	0.832137	-0.168259	22.0344	20.4968	23.3536	20.1089	22.0403	22.7608	18.2554	21.1036	22.3875	22.6852
V-type proton ATPase subunit d 1 OS=Homo sapiens OX=9606 GN=ATP6V0D1 PE=1 SV=1	ATP6V0D1	P61421	4.267	6	2	2	10	2	351	40.3	5	0.306149	0.521937	23.164	22.8344	25.3274	24.2273	24.2936	24.0152	24.3032	23.7025	25.2354	25.2
Junctional adhesion molecule C OS=Homo sapiens OX=9606 GN=JAM3 PE=1 SV=1	JAM3	Q9BX67	4.263	6	2	2	21	2	310	35	7.59	0.254747	-0.52128	24.3038	23.6107	22.4722	24.4003	24.5937	24.471	22.8821	22.313	23.1711	23.9371
Chloride intracellular channel protein 4 OS=Homo sapiens OX=9606 GN=CLIC4 PE=1 SV=4	CLIC4	Q9Y696	4.247	7	1	1	5	1	253	28.8	5.59	0.548464	-0.585458	22.3874	21.3079		21.5048	21.1314	22.4056	22.0526	21.1068	18.4248
Neutrophil defensin 1 OS=Homo sapiens OX=9606 GN=DEFA1 PE=1 SV=1	DEFA1; DEFA1B	P59665	4.226	19	2	2	4	2	94	10.2	6.99	0.965821	0.028146	22.9682	22.2401	22.8134	22.1593	20.6273	23.5073	20.362	21.5342	23.0074	22.5382
Immunoglobulin lambda variable 3-21 OS=Homo sapiens OX=9606 GN=IGLV3-21 PE=1 SV=2	IGLV3-21	P80748	4.194	14	1	1	1	1	117	12.4	5.29	0.0566383	1.96486				20.8949	19.9963		21.2163	23.6046
Hepcidin OS=Homo sapiens OX=9606 GN=HAMP PE=1 SV=2	HAMP	P81172	4.092	19	1	1	5	1	84	9.4	8.81	0.0517404	1.43664	22.5419		23.1638	21.2415	20.2582	22.1084	22.7558		24.5549	23.5329
Lysozyme C OS=Homo sapiens OX=9606 GN=LYZ PE=1 SV=1	LYZ	P61626	4.056	8	1	1	3	1	148	16.5	9.16	0.686324	-0.201274	23.9902	23.2188	23.9545	22.3134	22.3875	23.6133	23.119	22.3978	23.0116	22.7162
Putative ubiquitin-conjugating enzyme E2 N-like OS=Homo sapiens OX=9606 GN=UBE2NL PE=1 SV=1	UBE2NL	Q5JXB2	4.05	7	1	1	4	1	153	17.4	5.92	0.709778	-0.203715	23.5908	21.8633	24.3505	22.6374			22.4108	22.0627	22.9996	24.154
Platelet endothelial aggregation receptor 1 OS=Homo sapiens OX=9606 GN=PEAR1 PE=1 SV=1	PEAR1	Q5VY43	4.029	2	1	1	8	1	1037	110.6	6.81	0.831252	-0.0950116	21.0603		20.194	21.0424	21.6846	21.4458	20.0393		20.6126	21.5037
Ras-related protein Rab-5C OS=Homo sapiens OX=9606 GN=RAB5C PE=1 SV=2	RAB5C	P51148	4.005	11	2	2	8	1	216	23.5	8.41	0.743658	-0.116739	23.0927	22.7692	23.5975	23.492	23.6816	22.8881	23.4773	22.4489	23.3346	23.9004
Docking protein 3 OS=Homo sapiens OX=9606 GN=DOK3 PE=1 SV=2	DOK3	Q7L591	3.958	4	2	2	7	2	496	53.3	7.77	0.328085	-1.12661	22.7534	22.2332		22.9886	23.0142	22.7899	23.0011	17.6055	22.0365	22.6706
Ras-related protein Rab-5B OS=Homo sapiens OX=9606 GN=RAB5B PE=1 SV=1	RAB5B	P61020	3.953	11	2	2	6	1	215	23.7	8.13	0.601385	0.310648	21.4594	20.8056	22.269	22.3247	21.9757	22.3617	21.7604	20.7432	21.8089	23.7134
Endothelin-converting enzyme 1 OS=Homo sapiens OX=9606 GN=ECE1 PE=1 SV=2	ECE1	P42892	3.917	2	1	1	8	1	770	87.1	5.88	0.862307	0.0779436	21.7059	21.7812	19.6553	21.5634	21.7377	21.5343	21.5916	20.2007	21.2633	22.2433
Complement C2 OS=Homo sapiens OX=9606 GN=C2 PE=1 SV=2	C2	P06681	3.893	6	2	2	2	2	752	83.2	7.42
Ras-related protein Rab-32 OS=Homo sapiens OX=9606 GN=RAB32 PE=1 SV=3	RAB32	Q13637	3.878	5	1	1	9	1	225	25	6.54	0.866712	0.0544479	23.8825	23.1481	23.0323	22.8241	23.5554	23.4648	23.4139	22.799	22.9595	24.0774
Kinesin-like protein KIF2A OS=Homo sapiens OX=9606 GN=KIF2A PE=1 SV=3	KIF2A	O00139	3.872	3	2	2	2	2	706	79.9	6.68	0.0190734	-1.20581	23.5468	22.973		23.4114	23.2529	22.1284	22.2702	21.2618	21.8559	22.9346
Keratin, type I cuticular Ha6 OS=Homo sapiens OX=9606 GN=KRT36 PE=2 SV=1	KRT36	O76013	3.863	5	2	2	14	1	467	52.2	4.94
Immunoglobulin lambda variable 5-45 OS=Homo sapiens OX=9606 GN=IGLV5-45 PE=3 SV=1	IGLV5-45	A0A087WSX0	3.859	14	1	1	3	1	123	13.2	7.2	0.346716	0.935788	23.4429	20.1681	19.9291		22.6366		23.2829	20.3824	23.7745
Heat shock protein beta-1 OS=Homo sapiens OX=9606 GN=HSPB1 PE=1 SV=2	HSPB1	P04792	3.836	8	1	1	3	1	205	22.8	6.4	0.824889	-0.102001	23.0967	21.2457	21.6716	22.7937	22.5629	21.6535	23.3976	21.2492	21.7747	22.7856
Putative protein FAM10A4 OS=Homo sapiens OX=9606 GN=ST13P4 PE=5 SV=1	ST13P4	Q8IZP2	3.815	6	1	1	8	1	240	27.4	5.08	0.259102	-0.676285		23.967	24.8333	23.3848	24.1721	22.205	24.1931	21.6399	24.8303	24.1968
Leukosialin OS=Homo sapiens OX=9606 GN=SPN PE=1 SV=1	SPN	P16150	3.787	2	1	1	8	1	400	40.3	5.1	0.748276	0.121381	24.116	22.5192	24.152	23.8167	23.9774	24.0556	23.6004	23.2066	24.0778	24.2478
Nucleosome assembly protein 1-like 1 OS=Homo sapiens OX=9606 GN=NAP1L1 PE=1 SV=1	NAP1L1	P55209	3.741	4	1	1	11	1	391	45.3	4.46	0.212977	-0.56585	22.1707	22.3626		22.5559	22.7056	21.7658	21.9033		21.8788	21.9835
Ubiquitin-associated and SH3 domain-containing protein B OS=Homo sapiens OX=9606 GN=UBASH3B PE=1 SV=2	UBASH3B	Q8TF42	3.74	4	1	1	4	1	649	72.6	6.93	0.102872	-1.40591	22.3771			22.4825	22.2418	21.8733	21.7124	20.1178	20.2924	20.8103
Poly(rC)-binding protein 3 OS=Homo sapiens OX=9606 GN=PCBP3 PE=2 SV=2	PCBP3	P57721	3.707	3	1	1	12	1	371	39.4	8.07	0.325035	-0.407928	22.5448		21.458	22.7496	22.713	22.2051	21.6742	21.4426	21.8548	22.6155
Charged multivesicular body protein 6 OS=Homo sapiens OX=9606 GN=CHMP6 PE=1 SV=3	CHMP6	Q96FZ7	3.69	6	1	1	5	1	201	23.5	5.31	0.688454	-0.192845		22.0094		22.6992	23.0194	22.4708	22.3668		21.4717	23.2234
Skin-specific protein 32 OS=Homo sapiens OX=9606 GN=XP32 PE=1 SV=1	XP32	Q5T750	3.666	9	2	2	2	2	250	26.2	7.97									20.2138
Type-1 angiotensin II receptor-associated protein OS=Homo sapiens OX=9606 GN=AGTRAP PE=1 SV=1	AGTRAP	Q6RW13	3.654	14	1	1	1	1	159	17.4	6.14			20.6753		19.4782			22.1854
TBC1 domain family member 10B OS=Homo sapiens OX=9606 GN=TBC1D10B PE=1 SV=3	TBC1D10B	Q4KMP7	3.602	3	1	1	2	1	808	87.1	9.19	0.27432	-0.578513	21.2466	19.7467	20.2817	20.8131	21.0114	19.9653	19.0677			21.0911
cAMP-dependent protein kinase catalytic subunit alpha OS=Homo sapiens OX=9606 GN=PRKACA PE=1 SV=2	PRKACA	P17612	3.591	5	2	2	8	2	351	40.6	8.79	0.179907	-0.532646	23.7156	23.3429	22.2916	23.4523	23.5336	23.2374	22.8658	22.2886	22.1097	23.1714
4F2 cell-surface antigen heavy chain OS=Homo sapiens OX=9606 GN=SLC3A2 PE=1 SV=3	SLC3A2	P08195	3.59	3	1	1	8	1	630	68	5.01	0.354616	0.687686	21.4588	22.6942	22.9271	20.3618	20.2652		22.4889	21.2718	22.9526	22.203
Lysosome-associated membrane glycoprotein 1 OS=Homo sapiens OX=9606 GN=LAMP1 PE=1 SV=3	LAMP1	P11279	3.536	3	1	1	6	1	417	44.9	8.75	0.555331	0.227829	23.3429	21.9893	23.3417	23.6441	23.9534	23.9301	23.0196	22.761	23.6745	24.0254
Calcium and integrin-binding protein 1 OS=Homo sapiens OX=9606 GN=CIB1 PE=1 SV=4	CIB1	Q99828	3.456	13	2	2	9	2	191	21.7	4.78	0.540057	0.401729	23.6257	19.3716	22.8158	21.2627	22.0821	23.2969	22.103	21.8405	20.8856	23.0407
Thrombospondin-1 OS=Homo sapiens OX=9606 GN=THBS1 PE=1 SV=2	THBS1	P07996	3.41	1	1	1	1	1	1170	129.3	4.94										21.585
Dual adapter for phosphotyrosine and 3-phosphotyrosine and 3-phosphoinositide OS=Homo sapiens OX=9606 GN=DAPP1 PE=1 SV=1	DAPP1	Q9UN19	3.327	4	1	1	8	1	280	32.2	7.8	0.267379	-0.651791	21.5492	20.0256		21.282	21.321	20.9281	20.9612		19.4062	20.2751
Leukocyte antigen CD37 OS=Homo sapiens OX=9606 GN=CD37 PE=1 SV=2	CD37	P11049	3.304	8	1	1	2	1	281	31.7	7.94	0.780847	-0.167225	21.6141			20.628	20.311	22.0735	20.4714	20.0156	21.2206	19.6378
Protein kinase C beta type OS=Homo sapiens OX=9606 GN=PRKCB PE=1 SV=4	PRKCB	P05771	3.28	4	2	2	3	2	671	76.8	7.01	0.669997	-0.246515	21.1341	20.2793		22.1057	22.3863	21.1547	22.4505	20.1372	21.1212	21.2857
Protein-L-isoaspartate(D-aspartate) O-methyltransferase OS=Homo sapiens OX=9606 GN=PCMT1 PE=1 SV=4	PCMT1	P22061	3.28	7	1	1	2	1	227	24.6	7.21						20.4986	20.5497		20.6526			20.7363
Hornerin OS=Homo sapiens OX=9606 GN=HRNR PE=1 SV=2	HRNR	Q86YZ3	3.273	2	1	1	4	1	2850	282.2	10.04	0.737337	-0.229991	20.6116	22.2438	21.4711		19.3896	21.8981	20.8015	20.4088	20.2734	20.1133
Immunoglobulin lambda-like polypeptide 1 OS=Homo sapiens OX=9606 GN=IGLL1 PE=1 SV=1	IGLL1	P15814	3.271	7	1	1	1	1	213	22.9	10.07										21.1516
Isoform B of Membrane cofactor protein OS=Homo sapiens OX=9606 GN=CD46	CD46	P15529-2	3.23	3	1	1	2	1	399	44.2	6.9	0.395141	-0.388166	21.7253		21.5327	20.8982	21.7954	22.2666	20.7445	19.793	21.1836	21.5107
Rho GDP-dissociation inhibitor 2 OS=Homo sapiens OX=9606 GN=ARHGDIB PE=1 SV=3	ARHGDIB	P52566	3.228	6	1	1	4	1	201	23	5.21	0.0808105	-0.839497	23.4474	22.3077	24.0585	23.8415	23.4327	22.1158	21.1	22.6594	23.2625	23.7527
Syntaxin-2 OS=Homo sapiens OX=9606 GN=STX2 PE=1 SV=3	STX2	P32856	3.212	3	1	1	6	1	288	33.3	6.28	0.518913	-0.228758	23.506	22.6927	23.054	23.358	23.7204	22.9753	22.7588			23.3783
RAS guanyl-releasing protein 2 OS=Homo sapiens OX=9606 GN=RASGRP2 PE=1 SV=1	RASGRP2	Q7LDG7	3.21	3	1	1	6	1	609	69.2	7.8	0.13234	-0.781758	22.6773	21.4841		22.9138	22.4543	21.6896	22.3005	20.3896		22.0229
Calpain small subunit 1 OS=Homo sapiens OX=9606 GN=CAPNS1 PE=1 SV=1	CAPNS1	P04632	3.206	4	1	1	9	1	268	28.3	5.2	0.578414	-0.212127	23.14	23.0688	21.7142	23.6383	23.8317	23.3148	22.8077	22.5151	22.5519	23.143
Guanine nucleotide-binding protein G(I)/G(S)/G(O) subunit gamma-11 OS=Homo sapiens OX=9606 GN=GNG11 PE=1 SV=1	GNG11	P61952	3.196	11	1	1	5	1	73	8.5	5.54	0.587903	-0.241294	23.0894	21.5215	21.8009	22.9897	23.308	22.77	21.6358	21.9718	22.1336	22.9917
CD44 antigen OS=Homo sapiens OX=9606 GN=CD44 PE=1 SV=3	CD44	P16070	3.167	3	2	2	5	2	742	81.5	5.33					21.1336	19.0356	19.0026
Cytosolic non-specific dipeptidase OS=Homo sapiens OX=9606 GN=CNDP2 PE=1 SV=2	CNDP2	Q96KP4	3.131	2	1	1	4	1	475	52.8	5.97	0.289199	-0.604253	20.9339			22.032	22.394	20.3196			21.9236	21.304
Immunoglobulin kappa variable 1D-33 OS=Homo sapiens OX=9606 GN=IGKV1D-33 PE=1 SV=2	IGKV1D-33	P01593	3.101	14	1	1	1	1	117	12.8	4.78
Protein disulfide-isomerase OS=Homo sapiens OX=9606 GN=P4HB PE=1 SV=3	P4HB	P07237	3.093	3	1	1	2	1	508	57.1	4.87	0.881523	0.0562717	21.5412	21.3642	21.0109	21.954	22.2376	21.7972		21.313	21.909	21.6922
Small membrane A-kinase anchor protein OS=Homo sapiens OX=9606 GN=C2orf88 PE=1 SV=2	C2orf88	Q9BSF0	3.068	20	1	1	6	1	95	11	4.87	0.114518	-0.795372	22.1186	21.443		22.264	21.2355	21.7396	21.6938	20.438	20.5528	20.4254
Peroxiredoxin-5, mitochondrial OS=Homo sapiens OX=9606 GN=PRDX5 PE=1 SV=4	PRDX5	P30044	3.042	8	1	1	8	1	214	22.1	8.7	0.0363864	-1.01501	21.223			22.0093	21.528	20.9763	21.3345	20.1638	20.3231	20.061
Apolipoprotein D OS=Homo sapiens OX=9606 GN=APOD PE=1 SV=1	APOD	P05090	3.006	12	2	2	13	2	189	21.3	5.15	0.474099	0.285638	24.4442	24.1124	24.8978	23.1632	23.1557	24.2842	23.2367	24.3416	24.7158	24.6232
Vacuolar protein sorting-associated protein 37C OS=Homo sapiens OX=9606 GN=VPS37C PE=1 SV=2	VPS37C	A5D8V6	2.995	3	1	1	2	1	355	38.6	5.21	0.376071	0.354787			21.3686	21.2651	20.9624	20.9424	21.4574		21.5313	22.283
V-type proton ATPase subunit d 2 OS=Homo sapiens OX=9606 GN=ATP6V0D2 PE=2 SV=1	ATP6V0D2	Q8N8Y2	2.988	5	1	1	1	1	350	40.4	5.3	0.551637	0.422934	21.6935			22.3586	22.2043	21.806	23.6465	21.9307	22.5189	22.6401
Glycerol-3-phosphate dehydrogenase, mitochondrial OS=Homo sapiens OX=9606 GN=GPD2 PE=1 SV=3	GPD2	P43304	2.918	5	1	1	2	1	727	80.8	7.69
Apolipoprotein M OS=Homo sapiens OX=9606 GN=APOM PE=1 SV=2	APOM	O95445	2.893	9	2	2	16	2	188	21.2	6.01	0.643766	-0.238193	25.5912	24.8627	26.9977	24.5509	25.4512	24.1271	25.3594	25.314	25.4059	26.0563
Proline-serine-threonine phosphatase-interacting protein 2 OS=Homo sapiens OX=9606 GN=PSTPIP2 PE=1 SV=4	PSTPIP2	Q9H939	2.892	4	1	1	6	1	334	38.8	8.48	0.160705	-0.722466	21.5237			21.6283	21.9926	21.4413	20.2527	21.5158	20.2717	21.4805
Choline transporter-like protein 2 OS=Homo sapiens OX=9606 GN=SLC44A2 PE=1 SV=3	SLC44A2	Q8IWA5	2.882	1	1	1	7	1	706	80.1	8.57	0.971711	0.0164814	22.3105	20.3737	21.1716	22.0823	22.9722	23.0053	21.4725	21.5221	21.1728	21.8201
V-type immunoglobulin domain-containing suppressor of T-cell activation OS=Homo sapiens OX=9606 GN=VSIR PE=1 SV=3	VSIR	Q9H7M9	2.86	5	1	1	1	1	311	33.9	6.95	0.909991	0.0626145	20.425			20.1236	21.0761	20.5223	21.5378		20.6444	19.7123
Immunoglobulin epsilon heavy chain OS=Homo sapiens OX=9606 PE=1 SV=1	IGE	P0DOX4	2.827	2	1	1	1	1	547	60.3	7.99	0.707484	-0.655193	21.8371							21.1819
Nck-associated protein 1-like OS=Homo sapiens OX=9606 GN=NCKAP1L PE=1 SV=3	NCKAP1L	P55160	2.816	1	1	1	2	1	1127	128.1	6.86	0.788542	-0.132321	20.8007			21.201	21.3529	20.1991	21.1829			21.5757
GTP-binding protein SAR1a OS=Homo sapiens OX=9606 GN=SAR1A PE=1 SV=1	SAR1A	Q9NR31	2.812	6	1	1	7	1	198	22.4	6.68	0.904339	-0.0819977	21.7071	22.577	20.5852	22.3459	22.8543	21.0913	23.79		21.4115	21.4348
Immunoglobulin kappa variable 1-16 OS=Homo sapiens OX=9606 GN=IGKV1-16 PE=1 SV=2	IGKV1-16	P04430	2.795	14	1	1	1	1	117	12.6	8.16	0.221605	-1.78685	20.8368	24.2686	21.1601			20.6175		19.9857
Transmembrane protein C16orf54 OS=Homo sapiens OX=9606 GN=C16orf54 PE=1 SV=1	C16orf54	Q6UWD8	2.795	13	1	1	2	1	224	24.3	6.19	0.481212	-0.632814	22.1868		23.6689			22.5122			21.1388	23.2341
Sodium/potassium-transporting ATPase subunit beta-3 OS=Homo sapiens OX=9606 GN=ATP1B3 PE=1 SV=1	ATP1B3	P54709	2.79	4	1	1	7	1	279	31.5	8.35	0.268468	-0.425956	21.6787	21.0951	21.8028	21.1877	21.2488	20.5924	20.8566	19.9384	21.5188	21.9772
Translationally-controlled tumor protein OS=Homo sapiens OX=9606 GN=TPT1 PE=1 SV=1	TPT1	P13693	2.786	9	1	1	2	1	172	19.6	4.93	0.26373	-0.57247	20.9271			21.4058	21.0217		19.9476			21.1439
Acetylcholinesterase OS=Homo sapiens OX=9606 GN=ACHE PE=1 SV=1	ACHE	P22303	2.78	2	1	1	8	1	614	67.8	6.29	0.931453	-0.0565245			20.775	20.8022	21.2856	19.8259	21.4812	19.5634	21.9141	21.7041
Keratin-associated protein 11-1 OS=Homo sapiens OX=9606 GN=KRTAP11-1 PE=2 SV=1	KRTAP11-1	Q8IUC1	2.773	6	1	1	1	1	163	17.1	7.9
Immunoglobulin lambda variable 2-14 OS=Homo sapiens OX=9606 GN=IGLV2-14 PE=1 SV=2	IGLV2-14	P01704	2.727	13	1	1	3	1	120	12.6	6.49					21.5853	22.4796
Glutathione peroxidase 1 OS=Homo sapiens OX=9606 GN=GPX1 PE=1 SV=4	GPX1	P07203	2.724	6	1	1	19	1	203	22.1	6.55	0.61364	-0.253558	21.9388	22.0036	20.6029	23.2453	23.5406	21.6794	22.6452	21.3244	21.5779	22.8365
UTP--glucose-1-phosphate uridylyltransferase OS=Homo sapiens OX=9606 GN=UGP2 PE=1 SV=5	UGP2	Q16851	2.718	6	2	2	2	2	508	56.9	8.15	0.672494	-0.185619	21.8961	21.3359	20.4497	22.2623	22.26	21.2543	21.5562			21.555
Ras-related protein R-Ras OS=Homo sapiens OX=9606 GN=RRAS PE=1 SV=1	RRAS	P10301	2.653	9	1	1	4	1	218	23.5	6.93	0.880427	0.0800639	21.4136	20.78		20.995	21.8008		21.6586			20.9963
Autophagy-related protein 9A OS=Homo sapiens OX=9606 GN=ATG9A PE=1 SV=3	ATG9A	Q7Z3C6	2.607	1	1	1	2	1	839	94.4	6.67	0.114759	0.725464			19.8062	20.1422	19.8005		20.6397		20.6103	20.6754
Isocitrate dehydrogenase [NADP] cytoplasmic OS=Homo sapiens OX=9606 GN=IDH1 PE=1 SV=2	IDH1	O75874	2.59	3	1	1	2	1	414	46.6	7.01	0.571788	-0.260417	19.9938	19.0281	19.004	20.2027	20.9485	19.6756	19.3288		19.1608	20.1348
Programmed cell death protein 6 OS=Homo sapiens OX=9606 GN=PDCD6 PE=1 SV=1	PDCD6	O75340	2.572	6	1	1	2	1	191	21.9	5.4	0.671157	0.193266	20.7742	21.0253	19.4246	21.6401	22.2064	21.7893	21.4158	20.6884	20.9361
Serglycin OS=Homo sapiens OX=9606 GN=SRGN PE=1 SV=3	SRGN	P10124	2.567	9	1	1	5	1	158	17.6	4.96	0.165785	0.433864	21.7115	21.9273	22.2108	22.3897	21.9198	22.539	22.1174	22.0733	22.6822	22.9165
Ragulator complex protein LAMTOR5 OS=Homo sapiens OX=9606 GN=LAMTOR5 PE=1 SV=1	LAMTOR5	O43504	2.537	22	1	1	1	1	91	9.6	4.87	0.795873	-0.115582	22.7564	21.2696	21.9136	23.3886	23.4181	22.8917	22.7679	21.3153	22.2166	22.9768
Na(+)/H(+) exchange regulatory cofactor NHE-RF1 OS=Homo sapiens OX=9606 GN=SLC9A3R1 PE=1 SV=4	SLC9A3R1	O14745	2.534	3	1	1	10	1	358	38.8	5.77	0.0834338	-0.718746	21.9674	20.628	22.2175	21.9812	22.0811	21.4557	20.2979	20.8279	21.05	21.6501
Macrophage migration inhibitory factor OS=Homo sapiens OX=9606 GN=MIF PE=1 SV=4	MIF	P14174	2.498	8	1	1	16	1	115	12.5	7.88	0.267581	-0.382269	24.1917	23.9151	23.2438	24.7018	24.6803	23.8305	24.1713	22.8843	23.5091	24.4262
Keratin-associated protein 4-4 OS=Homo sapiens OX=9606 GN=KRTAP4-4 PE=1 SV=1	KRTAP4-4	Q9BYR3	2.456	7	1	1	1	1	166	18	7.91
Tetraspanin-18 OS=Homo sapiens OX=9606 GN=TSPAN18 PE=2 SV=1	TSPAN18	Q96SJ8	2.405	6	1	1	2	1	248	27.7	4.96						23.3469				24.5146
Junction plakoglobin OS=Homo sapiens OX=9606 GN=JUP PE=1 SV=3	JUP	P14923	2.404	2	1	1	1	1	745	81.7	6.14
Purine nucleoside phosphorylase OS=Homo sapiens OX=9606 GN=PNP PE=1 SV=2	PNP	P00491	2.397	3	1	1	13	1	289	32.1	6.95	0.814815	-0.127448	23.4391	22.9439	20.72	23.8698	23.944	23.6109	23.2431	21.9905	22.3313	23.1037
Thioredoxin OS=Homo sapiens OX=9606 GN=TXN PE=1 SV=3	TXN	P10599	2.396	9	1	1	8	1	105	11.7	4.92	0.358989	-0.550791	22.7144			22.6454	23.2977	22.2529			22.18	22.5721
Alpha-adducin OS=Homo sapiens OX=9606 GN=ADD1 PE=1 SV=2	ADD1	P35611	2.375	2	1	1	5	1	737	80.9	5.83	0.971484	0.0282066		20.9717	21.3957	22.247	20.7629		21.0808			21.6642
Keratin-associated protein 13-1 OS=Homo sapiens OX=9606 GN=KRTAP13-1 PE=2 SV=2	KRTAP13-1	Q8IUC0	2.375	8	1	1	1	1	172	18.3	8.12
Trypsin-3 OS=Homo sapiens OX=9606 GN=PRSS3 PE=1 SV=2	PRSS3	P35030	2.335	4	1	1	1	1	304	32.5	7.49	0.83908	-0.0938674	21.9685	22.3476	23.7115	21.7307	22.0087	21.7002	21.4047		22.8684	23.0649
Ubiquitin carboxyl-terminal hydrolase MINDY-1 OS=Homo sapiens OX=9606 GN=MINDY1 PE=1 SV=2	MINDY1	Q8N5J2	2.329	2	1	1	1	1	469	51.7	4.86	0.778587	-0.188378	21.8173	20.8843	20.1972	21.0042	20.9761	21.2081				20.3668
Transforming growth factor beta-1-induced transcript 1 protein OS=Homo sapiens OX=9606 GN=TGFB1I1 PE=1 SV=2	TGFB1I1	O43294	2.318	2	1	1	1	1	461	49.8	7.03	0.207203	-0.607074	20.9959	20.4939		21.0874	21.3616	21.257	20.7257	19.5866	20.3973	19.9213
Protein S100-A6 OS=Homo sapiens OX=9606 GN=S100A6 PE=1 SV=1	S100A6	P06703	2.267	9	1	1	6	1	90	10.2	5.48	0.736151	-0.143713	23.7363	22.8935	23.816	24.3867	24.5289	24.5693	23.256	22.8501	23.8984	24.0691
Plastin-2 OS=Homo sapiens OX=9606 GN=LCP1 PE=1 SV=6	LCP1	P13796	2.252	1	1	1	6	1	627	70.2	5.43	0.651772	0.304863	20.1047	17.7314	20.6967	20.5898	20.6381	22.5273	18.8796	19.0686	20.2792	20.5303
Immunoglobulin lambda variable 1-36 OS=Homo sapiens OX=9606 GN=IGLV1-36 PE=1 SV=5	IGLV1-36	A0A0B4J1U3	2.187	14	1	1	1	1	117	12.5	4.78
Proteolipid protein 2 OS=Homo sapiens OX=9606 GN=PLP2 PE=1 SV=1	PLP2	Q04941	2.143	9	1	1	2	1	152	16.7	7.24	0.666075	-0.148764	25.9272	25.201	24.8415	25.9185	26.3959	25.6974	24.8945	25.1156	25.8987	25.934
SLAM family member 5 OS=Homo sapiens OX=9606 GN=CD84 PE=1 SV=1	CD84	Q9UIB8	2.138	6	1	1	2	1	345	38.8	7.06	0.941519	-0.0425554	21.7044			20.6404	21.9196	21.2417				21.5161
Tetraspanin-33 OS=Homo sapiens OX=9606 GN=TSPAN33 PE=1 SV=1	TSPAN33	Q86UF1	2.122	4	1	1	2	1	283	31.5	7.17	0.856291	-0.102495	20.7449			20.701	21.5493	21.8751	20.1084			20.7043
Sorting nexin-3 OS=Homo sapiens OX=9606 GN=SNX3 PE=1 SV=3	SNX3	O60493	2.118	7	1	1	2	1	162	18.8	8.66	0.280354	1.03381	17.61	16.8399	19.2564	17.4936	18.2705				18.7343	19.1214
Integrin alpha-M OS=Homo sapiens OX=9606 GN=ITGAM PE=1 SV=2	ITGAM	P11215	2.117	1	1	1	2	1	1152	127.1	7.23	0.429577	0.545899	20.7881		21.5905	20.8829	19.3721	21.1676			21.2457	21.1995
Adenylate cyclase type 5 OS=Homo sapiens OX=9606 GN=ADCY5 PE=1 SV=3	ADCY5	O95622	2.087	1	1	1	1	1	1261	138.8	7.24			22.277			22.2681	22.1633
Type 2 phosphatidylinositol 4,5-bisphosphate 4-phosphatase OS=Homo sapiens OX=9606 GN=PIP4P2 PE=1 SV=1	PIP4P2	Q8N4L2	2.078	10	1	1	2	1	257	28.1	8.68	0.177992	0.685017	21.5568			20.5761	21.1348	21.9788	21.7542	21.6969		21.6672
2',3'-cyclic-nucleotide 3'-phosphodiesterase OS=Homo sapiens OX=9606 GN=CNP PE=1 SV=2	CNP	P09543	2.07	6	1	1	1	1	421	47.5	9.07			22.3556			21.5712	21.2485					20.2152
ADP-ribosylation factor-like protein 8A OS=Homo sapiens OX=9606 GN=ARL8A PE=1 SV=1	ARL8A	Q96BM9	2.067	5	1	1	1	1	186	21.4	7.77	0.826391	-0.104012	20.8104			20.7267	21.205	21.1975	20.181			21.0515
Keratin-associated protein 2-4 OS=Homo sapiens OX=9606 GN=KRTAP2-4 PE=1 SV=1	KRTAP2-4	Q9BYR9	2.065	18	1	1	1	1	128	13.5	7.87
C5a anaphylatoxin chemotactic receptor 1 OS=Homo sapiens OX=9606 GN=C5AR1 PE=1 SV=2	C5AR1	P21730	2.061	3	1	1	1	1	350	39.3	9.01	0.843707	-0.0908742	24.9312	25.517	26.7093	24.7505	24.4617	24.9437	24.6408	24.3345	26.2107	25.7857
Thromboxane-A synthase OS=Homo sapiens OX=9606 GN=TBXAS1 PE=1 SV=3	TBXAS1	P24557	2.057	2	1	1	3	1	533	60.5	7.62	0.176778	-0.727952	21.0597			20.5154	21.5318	20.8317	19.7238		20.0965	20.5787
Septin-7 OS=Homo sapiens OX=9606 GN=SEPTIN7 PE=1 SV=2	SEPTIN7	Q16181	2.054	4	1	1	2	1	437	50.6	8.63	0.333024	-0.643809	22.1288			22.3989	21.9574	21.1231				21.9127
Myosin light chain kinase, smooth muscle OS=Homo sapiens OX=9606 GN=MYLK PE=1 SV=4	MYLK	Q15746	2.052	1	1	1	2	1	1914	210.6	6.15	0.338943	-0.503674	21.381	20.1712		21.8389	22.1329	20.5226	21.3774	19.8865	20.6459	21.9542
Low affinity immunoglobulin gamma Fc region receptor II-c OS=Homo sapiens OX=9606 GN=FCGR2C PE=1 SV=1	FCGR2C	P31995	2.035	3	1	1	11	1	323	35.6	6.9	0.351154	-0.503793	22.0104	21.2993	21.5086	22.2174	22.445	21.8305	20.4054	21.3362		21.9973
Myeloid-associated differentiation marker OS=Homo sapiens OX=9606 GN=MYADM PE=1 SV=2	MYADM	Q96S97	2.028	8	1	1	1	1	322	35.3	8.15									20.9843
Heme-binding protein 2 OS=Homo sapiens OX=9606 GN=HEBP2 PE=1 SV=1	HEBP2	Q9Y5Z4	2.015	6	1	1	2	1	205	22.9	4.63	0.564788	-0.453628	20.5612			20.1862	20.5774	21.7373	20.5949	19.5781	18.3908	19.6387
Protein BRICK1 OS=Homo sapiens OX=9606 GN=BRK1 PE=1 SV=1	BRK1	Q8WUW1	1.998	11	1	1	1	1	75	8.7	5.45	0.394466	-0.36986	23.8337	22.7588		23.6761	24.2427	23.8413	23.5496	22.8011	22.4051	23.6926
Syntaxin-4 OS=Homo sapiens OX=9606 GN=STX4 PE=1 SV=2	STX4	Q12846	1.982	4	1	1	5	1	297	34.2	6.28	0.903423	-0.0470562	23.0076	22.03	22.8458	22.879	23.0653	21.8829	22.8237		22.9519	23.2154
Kinesin-like protein KIF14 OS=Homo sapiens OX=9606 GN=KIF14 PE=1 SV=1	KIF14	Q15058	1.957	1	1	1	3	1	1648	186.4	7.91	0.0980137	-0.618348	20.2051	19.5851	20.1025	19.5421	19.8058	19.4508	19.5451	18.607	19.1503	19.3958
Short stature homeobox protein 2 OS=Homo sapiens OX=9606 GN=SHOX2 PE=2 SV=4	SHOX2	O60902	1.936	4	1	1	4	1	331	34.9	8.82	0.543891	0.290067	27.5006	27.8352	28.6306	26.5938	27.0087	27.3772	26.7424	27.4715	29.6753	27.7528
Cathepsin D OS=Homo sapiens OX=9606 GN=CTSD PE=1 SV=1	CTSD	P07339	1.933	2	1	1	1	1	412	44.5	6.54	0.742697	-0.205478	21.4284		22.0408	20.236	20.9892	20.7407	20.0078		21.6597	21.4643
P-selectin glycoprotein ligand 1 OS=Homo sapiens OX=9606 GN=SELPLG PE=1 SV=1	SELPLG	Q14242	1.911	2	1	1	2	1	412	43.2	4.4	0.96505	-0.0376442	19.5713		22.9604			21.0476		21.0941	21.1182	21.6528
Immunoglobulin lambda variable 3-10 OS=Homo sapiens OX=9606 GN=IGLV3-10 PE=3 SV=2	IGLV3-10	A0A075B6K4	1.908	9	1	1	1	1	115	12.4	4.83	0.907033	-0.0709871	21.6743	22.9965		20.5917	22.5398	21.9324	21.3621	22.6525		21.5714
Putative tetraspanin-19 OS=Homo sapiens OX=9606 GN=TSPAN19 PE=5 SV=1	TSPAN19	P0C672	1.853	4	1	1	8	1	248	28.4	7.64	0.384966	0.530268	24.6436	24.6482	24.8623	22.7561	23.6292	25.3733	24.5967	24.2049	25.9391	23.0766
Dematin OS=Homo sapiens OX=9606 GN=DMTN PE=1 SV=3	DMTN	Q08495	1.844	2	1	1	8	1	405	45.5	8.88	0.419515	-0.436138	21.3977	21.5395	20.3703	22.5219	22.4891	21.049	21.9084		20.1923	21.7605
Neuronal PAS domain-containing protein 2 OS=Homo sapiens OX=9606 GN=NPAS2 PE=1 SV=3	NPAS2	Q99743	1.842	2	1	1	2	1	824	91.7	6.81			29.6921	30.2645	30.5251	24.9807	24.7787
Peflin OS=Homo sapiens OX=9606 GN=PEF1 PE=1 SV=1	PEF1	Q9UBV8	1.835	4	1	1	1	1	284	30.4	6.54	0.257925	0.712726		18.4267		19.3935		21.0298	19.4591	18.8963	19.872	18.857
Tetraspanin-2 OS=Homo sapiens OX=9606 GN=TSPAN2 PE=1 SV=2	TSPAN2	O60636	1.829	5	1	1	5	1	221	24.1	7.77	0.71341	0.178306	21.6392	19.5037	19.988	20.2908	21.9527	22.0696	19.6779	21.0553	20.3327	21.1304
C-C motif chemokine 18 OS=Homo sapiens OX=9606 GN=CCL18 PE=1 SV=1	CCL18	P55774	1.828	25	1	1	2	1	89	9.8	8.75	0.291698	0.827995	20.9939		22.6976	20.9734			22.5501			22.2158
Isoform 5 of cAMP-specific 3',5'-cyclic phosphodiesterase 4D OS=Homo sapiens OX=9606 GN=PDE4D	PDE4D	Q08499-6	1.825	1	1	1	20	1	745	84.4	5.17	0.399432	-0.404803	24.3987	25.0308	26.3734	24.1329	24.1701	23.7952	23.3381	24.5002	24.9857	25.4627
Plexin-A4 OS=Homo sapiens OX=9606 GN=PLXNA4 PE=1 SV=4	PLXNA4	Q9HCM2	1.816	1	1	1	1	1	1894	212.3	6.86	0.274388	-0.682419	21.2855			20.7734	20.5915	20.4397	20.3478	21.1793	18.7828	20.2555
Elongation factor 1-gamma OS=Homo sapiens OX=9606 GN=EEF1G PE=1 SV=3	EEF1G	P26641	1.796	3	1	1	3	1	437	50.1	6.67	0.986806	-0.00680966	21.0601	21.0544	21.1948	21.9216	21.7377	21.2122	21.2237			21.7248
Vesicle-associated membrane protein 8 OS=Homo sapiens OX=9606 GN=VAMP8 PE=1 SV=1	VAMP8	Q9BV40	1.779	14	1	1	2	1	100	11.4	7.34	0.534423	0.305326	22.795	20.3305	23.0233	22.6331	23.3413	22.7208	23.1477	21.8591	22.5646	23.3577
Isoform 2 of Fanconi anemia group J protein OS=Homo sapiens OX=9606 GN=BRIP1	BRIP1	Q9BX63-2	1.779	1	1	1	1	1	994	112.4	8.21	0.639507	0.618592	22.4502	25.399	23.73			24.2601	22.7828	27.4372	23.4333
Serine/threonine-protein kinase TAO1 OS=Homo sapiens OX=9606 GN=TAOK1 PE=1 SV=1	TAOK1	Q7L7X3	1.772	1	1	1	1	1	1001	116	7.65	0.774985	-0.177865	20.8005	20.8457		21.0132	21.3293					20.8193
Protein kinase C and casein kinase substrate in neurons protein 2 OS=Homo sapiens OX=9606 GN=PACSIN2 PE=1 SV=2	PACSIN2	Q9UNF0	1.765	2	1	1	1	1	486	55.7	5.2
Phosphatidylinositide phosphatase SAC1 OS=Homo sapiens OX=9606 GN=SACM1L PE=1 SV=2	SACM1L	Q9NTJ5	1.764	2	1	1	1	1	587	66.9	7.12	0.656273	-0.226041	20.8703			20.2765	21.0543	20.5872	20.2755			20.6603
T-complex protein 1 subunit delta OS=Homo sapiens OX=9606 GN=CCT4 PE=1 SV=4	CCT4	P50991	1.756	3	1	1	2	1	539	57.9	7.83	0.649308	-0.349386	21.0953			21.4914	21.6404					21.0596
Villin-like protein OS=Homo sapiens OX=9606 GN=VILL PE=2 SV=3	VILL	O15195	1.736	2	1	2	6	1	856	95.8	7.02	0.495315	0.498434	23.2709	24.6825	25.4301	25.2081	23.1337	23.5534	24.8419	27.9767	23.4257	24.4199
CD151 antigen OS=Homo sapiens OX=9606 GN=CD151 PE=1 SV=3	CD151	P48509	1.731	3	1	1	5	1	253	28.3	7.47	0.516658	0.4336	20.3228	17.2878	19.0689	20.0325	21.565	21.1638	18.7962	19.4806	19.9766	21.0279
HLA class II histocompatibility antigen, DR alpha chain OS=Homo sapiens OX=9606 GN=HLA-DRA PE=1 SV=1	HLA-DRA	P01903	1.722	2	1	1	3	1	254	28.6	5	0.413456	-0.447046	20.141	20.2663	22.0667	19.5771	19.6671	19.4979	19.6784	19.4351	19.9225	20.949
Ras-related protein Rab-19 OS=Homo sapiens OX=9606 GN=RAB19 PE=2 SV=2	RAB19	A4D1S5	1.718	5	1	1	1	1	217	24.4	6.52	0.981567	-0.00874295	22.7222	22.0773	21.3599	22.9389	23.0087	22.1406	22.4017		22.201	22.9072
Rho GTPase-activating protein 18 OS=Homo sapiens OX=9606 GN=ARHGAP18 PE=1 SV=3	ARHGAP18	Q8N392	1.718	3	1	1	2	1	663	74.9	6.44	0.563541	0.426729	22.0015	19.1728	18.8119	21.7531	21.1859	21.4631	21.2176		20.5335	20.8328
Kelch-like protein 31 OS=Homo sapiens OX=9606 GN=KLHL31 PE=2 SV=1	KLHL31	Q9H511	1.71	3	1	1	1	1	634	70.2	6.73	0.616384	0.34285	24.4286	26.444	25.6888	23.0469	23.5202	25.5546	25.5685	24.6355	25.3278	23.7563
Retinoid-inducible serine carboxypeptidase OS=Homo sapiens OX=9606 GN=SCPEP1 PE=1 SV=1	SCPEP1	Q9HB40	1.701	7	1	1	1	1	452	50.8	5.81	0.112855	-0.940549				23.409	23.3322	22.4252	22.0411	22.2008	23.0531
Galectin-3 OS=Homo sapiens OX=9606 GN=LGALS3 PE=1 SV=5	LGALS3	P17931	1.696	6	1	1	1	1	250	26.1	8.56									21.6088			21.8103
Sarcoplasmic/endoplasmic reticulum calcium ATPase 1 OS=Homo sapiens OX=9606 GN=ATP2A1 PE=1 SV=1	ATP2A1	O14983	1.688	2	1	1	2	1	1001	110.2	5.16	0.098578	-0.899876	20.7936			20.9013	20.9929	20.5285			19.2849	20.1748
S-formylglutathione hydrolase OS=Homo sapiens OX=9606 GN=ESD PE=1 SV=2	ESD	P10768	1.683	6	1	1	1	1	282	31.4	7.02	0.536425	-0.467729	20.3821			20.8508	21.0621		21.0025			19.5921
Histone deacetylase 7 OS=Homo sapiens OX=9606 GN=HDAC7 PE=1 SV=2	HDAC7	Q8WUI4	1.679	2	1	1	9	1	952	102.9	7.58	0.276461	-0.532539	26.2054	25.4736	24.3073	26.7408	26.6472	25.5973	25.8272	25.2355	23.786	26.2656
Guanine nucleotide-binding protein G(I)/G(S)/G(O) subunit gamma-12 OS=Homo sapiens OX=9606 GN=GNG12 PE=1 SV=3	GNG12	Q9UBI6	1.642	15	1	1	1	1	72	8	8.97	0.838078	-0.194922	18.3377		20.3555			17.9385			19.677	19.8397
Cytochrome b reductase 1 OS=Homo sapiens OX=9606 GN=CYBRD1 PE=1 SV=1	CYBRD1	Q53TN4	1.632	3	1	1	2	1	286	31.6	8.76	0.460258	0.403904	21.3388	21.2624	23.5089	21.9288	21.4545	21.4486	21.8558	21.9783	22.6901	23.5401
Bone marrow stromal antigen 2 OS=Homo sapiens OX=9606 GN=BST2 PE=1 SV=1	BST2	Q10589	1.629	6	1	1	1	1	180	19.8	5.6					22.8054							21.0441
YEATS domain-containing protein 2 OS=Homo sapiens OX=9606 GN=YEATS2 PE=1 SV=2	YEATS2	Q9ULM3	1.625	1	1	1	3	1	1422	150.7	8.98	0.44638	1.11087	19.3197	21.8981	19.7849		22.2435	21.6277		22.2171
Pre-mRNA-processing factor 19 OS=Homo sapiens OX=9606 GN=PRPF19 PE=1 SV=1	PRPF19	Q9UMS4	1.603	2	1	1	4	1	504	55.1	6.61	0.107406	-0.79823	21.3728	20.5997		21.6273	21.8654	20.5032	20.4651	20.2423	19.8685	21.7612
Thrombopoietin receptor OS=Homo sapiens OX=9606 GN=MPL PE=1 SV=1	MPL	P40238	1.603	3	1	1	2	1	635	71.2	6.48	0.644523	0.347293	20.681			19.4815	19.8488	20.9293				19.7729
Kell blood group glycoprotein OS=Homo sapiens OX=9606 GN=KEL PE=1 SV=2	KEL	P23276	1.57	1	1	1	1	1	732	82.8	7.9	0.265337	0.7553			21.1215	19.3271	19.4311		20.5828		21.2333	20.3295
WW domain-binding protein 2 OS=Homo sapiens OX=9606 GN=WBP2 PE=1 SV=1	WBP2	Q969T9	1.567	4	1	1	2	1	261	28.1	5.91	0.920186	0.0462907	21.5578		21.5235	21.641	22.0323	21.1753			21.6097	22.4198
Immunoglobulin lambda variable 3-19 OS=Homo sapiens OX=9606 GN=IGLV3-19 PE=1 SV=2	IGLV3-19	P01714	1.563	8	1	1	1	1	112	12	4.96									20.734	23.1005
Aflatoxin B1 aldehyde reductase member 2 OS=Homo sapiens OX=9606 GN=AKR7A2 PE=1 SV=3	AKR7A2	O43488	1.547	4	1	1	2	1	359	39.6	7.17	0.327502	-0.537586	21.4274			21.7171	21.839	21.5683	21.1419			20.6604
Exosome complex component RRP42 OS=Homo sapiens OX=9606 GN=EXOSC7 PE=1 SV=3	EXOSC7	Q15024	1.537	2	1	1	9	1	291	31.8	5.19	0.379324	-0.569873	21.7127	21.5974	23.824	20.573	20.914	20.9427	19.3927	21.5725	20.8563	23.0076
Protein S100-A9 OS=Homo sapiens OX=9606 GN=S100A9 PE=1 SV=1	S100A9	P06702	1.527	7	1	1	2	1	114	13.2	6.13	0.673881	0.221282	23.2056	24.1346	23.9693	21.7736	22.8618	23.4628	22.9342	22.5154	23.9926	24.1463
Guanine nucleotide-binding protein G(I)/G(S)/G(O) subunit gamma-5 OS=Homo sapiens OX=9606 GN=GNG5 PE=1 SV=3	GNG5	P63218	1.526	10	1	1	10	1	68	7.3	9.85	0.431326	-0.331224	22.6948	21.2537	22.1976	22.4068	22.74	22.472	21.3347	21.4006	21.8449	22.5845
Atypical chemokine receptor 1 OS=Homo sapiens OX=9606 GN=ACKR1 PE=1 SV=3	ACKR1	Q16570	1.519	7	1	1	6	1	336	35.5	6.58	0.287694	1.30827					20.5592		22.548	20.8243	22.2985	21.799
RING finger protein 11 OS=Homo sapiens OX=9606 GN=RNF11 PE=1 SV=1	RNF11	Q9Y3C5	1.512	8	1	1	1	1	154	17.4	4.78	0.18631	0.716388	21.015	21.057	23.1864	22.1137	21.5312	21.6565	22.3233		22.7779	23.2305
Isoform 2 of F-box DNA helicase 1 OS=Homo sapiens OX=9606 GN=FBH1	FBH1	Q8NFZ0-2	1.503	1	1	1	4	1	1094	123.3	8.1	0.791209	-0.17424	23.2698	22.576	20.1008	22.258	22.3015	21.9805	22.2555	21.1009		22.3711
C-X-C chemokine receptor type 4 OS=Homo sapiens OX=9606 GN=CXCR4 PE=1 SV=1	CXCR4	P61073	1.498	3	1	1	1	1	352	39.7	8.21	0.687536	0.197937	21.5115	19.798		20.8087	21.0176	21.3465	20.8598	20.4112		21.31
Aspartate--tRNA ligase, cytoplasmic OS=Homo sapiens OX=9606 GN=DARS PE=1 SV=2	DARS1	P14868	1.491	2	1	1	2	1	501	57.1	6.55	0.569388	-0.376358	20.2291			20.7921	20.9714					20.2878
Malate dehydrogenase, cytoplasmic OS=Homo sapiens OX=9606 GN=MDH1 PE=1 SV=4	MDH1	P40925	1.488	3	1	1	3	1	334	36.4	7.36	0.758135	-0.13946	21.7964	21.0234	20.4732	21.9997	22.3154	21.3993	20.7822		21.4619	21.8852
Unconventional prefoldin RPB5 interactor 1 OS=Homo sapiens OX=9606 GN=URI1 PE=1 SV=3	URI1	O94763	1.479	1	1	1	1	1	535	59.8	5.05	0.915239	-0.0907193	19.3931		19.9093	18.9937	19.1469	18.8621	18.4762		19.702	20.0398
Uncharacterized protein C22orf46 OS=Homo sapiens OX=9606 GN=C22orf46 PE=5 SV=1	C22orf46	C9J442	1.474	13	1	1	1	1	243	27.5	8.51	0.0688061	2.21937	21.6162			18.0108	18.2465	22.4268	20.2871	21.8177
Small integral membrane protein 5 OS=Homo sapiens OX=9606 GN=SMIM5 PE=1 SV=2	SMIM5	Q71RC9	1.473	12	1	1	4	1	77	8.5	7.96	0.473524	0.361333	24.0062	21.1732	23.1636	23.9892	24.2443	24.736	23.1125	23.2216	23.4472	23.8656
NEDD4-binding protein 1 OS=Homo sapiens OX=9606 GN=N4BP1 PE=1 SV=4	N4BP1	O75113	1.466	2	1	1	1	1	896	100.3	5.36							19.624	22.4848	21.0879	20.3711	21.2992
Blood group Rh(D) polypeptide OS=Homo sapiens OX=9606 GN=RHD PE=1 SV=3	RHD	Q02161	1.459	2	1	1	2	1	417	45.2	8.5	0.453709	0.58212	23.1404	22.6071	23.0668	24.1736			24.5816		23.4797	23.426
Collagen alpha-1(XIII) chain OS=Homo sapiens OX=9606 GN=COL13A1 PE=1 SV=1	COL13A1	Q5TAT6	1.449	2	1	1	1	1	717	69.9	9.17	0.847078	-0.222034		21.4044			21.6119		21.2861
CMT1A duplicated region transcript 15 protein OS=Homo sapiens OX=9606 GN=CDRT15 PE=2 SV=1	CDRT15	Q96T59	1.433	10	1	1	1	1	188	20.6	8.05
Ankyrin repeat and protein kinase domain-containing protein 1 OS=Homo sapiens OX=9606 GN=ANKK1 PE=2 SV=1	ANKK1	Q8NFD2	1.42	1	1	1	7	1	765	84.6	7.08	0.757885	-0.161658	22.6483	21.4222	20.0112	22.5932	23.142	22.5364	21.6419	21.3354	21.1426	22.3525
Isoform 4 of Protein phosphatase 1M OS=Homo sapiens OX=9606 GN=PPM1M	PPM1M	Q96MI6-4	1.419	10	1	1	1	1	247	27.9	5.63
V-type proton ATPase catalytic subunit A OS=Homo sapiens OX=9606 GN=ATP6V1A PE=1 SV=2	ATP6V1A	P38606	1.407	3	1	1	2	1	617	68.3	5.52	0.342558	-0.503489	19.9174			20.693	20.3423	20.3236	20.6749	19.2393	20.4	18.4325
Serine protease inhibitor Kazal-type 5 OS=Homo sapiens OX=9606 GN=SPINK5 PE=1 SV=2	SPINK5	Q9NQ38	1.388	1	1	1	4	1	1064	120.6	8.06	0.950338	-0.046688	23.59	25.1677	22.1288	23.1626	23.1612	21.6947	24.698	22.2853	24.1939	24.105
Spindle assembly abnormal protein 6 homolog OS=Homo sapiens OX=9606 GN=SASS6 PE=1 SV=1	SASS6	Q6UVJ0	1.376	1	1	1	2	1	657	74.4	7.55	0.592948	-0.279304	22.1704		22.175	22.5091	23.3685	23.3038		21.6923	22.3245	21.7852
Protein transport protein Sec23B OS=Homo sapiens OX=9606 GN=SEC23B PE=1 SV=2	SEC23B	Q15437	1.37	4	1	1	1	1	767	86.4	6.89
Angiotensinogen OS=Homo sapiens OX=9606 GN=AGT PE=1 SV=1	AGT	P01019	1.359	2	1	1	1	1	485	53.1	6.32										22.6189
Cyclic AMP-responsive element-binding protein 3-like protein 2 OS=Homo sapiens OX=9606 GN=CREB3L2 PE=1 SV=3	CREB3L2	Q70SY1	1.354	2	1	1	4	1	520	57.4	5.43	0.0828815	-0.842056	26.827	26.7928	28.3637		26.8123	26.1573	26.0555	26.1152	26.1444	27.312
Ubiquitin-like modifier-activating enzyme 1 OS=Homo sapiens OX=9606 GN=UBA1 PE=1 SV=3	UBA1	P22314	1.314	1	1	1	2	1	1058	117.8	5.76	0.412201	-0.568563	21.832			21.7695	22.0619					21.3193
Caspase-6 OS=Homo sapiens OX=9606 GN=CASP6 PE=1 SV=2	CASP6	P55212	1.172	3	1	1	3	1	293	33.3	6.93	0.167707	-0.557447	21.5379	21.2314		21.9936	21.7928	21.2259	21.1989		20.4925	21.4086
